# Supplementary material for: Artificial Intelligence-Based Human–Computer Interaction Technology Applied in Consumer Behavior Analysis and Experiential Education
Source: Front Psychol. 2022 Apr 6;13:784311. doi: 10.3389/fpsyg.2022.784311 (PMC9020504; doi:10.3389/fpsyg.2022.784311)
Supplement: Supplementary file 1 [file Table_1.XLSX]

## Sheet: Figure 2
Experimental results							Raw data	Gabor	Angry	Disgust	Scard	Happy	Sad	Surprised	Gray	Angry	Disgust	Scard	Happy	Sad	Surprised
Accuracy/%	Angry	Disgust	Scard	Happy	Sad	Surprised			0	0	0	0	0	0		0	0	0	0	0	0
Gabor	95.09	89.6	81.94	95.59	81.03	95.79			1	1	1	1	1	1		1	1	1	1	1	1
Gray	90.3	84.61	81.89	90.6	85.72	95.64			1	1	1	1	1	1		1	1	1	1	1	1
									1	1	2	1	4	1		1	2	2	1	1	1
									0	0	0	0	0	0		0	0	0	0	0	0
									0	0	0	0	0	0		0	0	0	0	0	0
									1	2	4	1	4	1		2	4	4	4	4	1
									1	1	1	1	1	1		1	1	1	1	1	1
Statistical results									1	1	4	1	4	1		1	4	4	1	4	1
TP 0	Angry	Disgust	Scard	Happy	Sad	Surprised			0	0	0	0	0	0		0	0	0	0	0	0
Gabor	82	82	109	99	89	107			2	4	4	4	4	1		4	4	4	4	4	2
Gray	97	92	114	102	80	94			1	1	1	1	1	1		1	1	1	1	1	1
TN 1	Angry	Disgust	Scard	Happy	Sad	Surprised			0	0	0	0	0	0		0	0	0	0	0	0
Gabor	121	109	66	105	84	97			1	1	1	1	1	1		1	1	1	1	1	1
Gray	95	88	60	91	103	110			1	1	0	0	0	0		0	0	0	0	1	0
FN 2	Angry	Disgust	Scard	Happy	Sad	Surprised			0	0	0	0	0	0		0	0	0	0	0	0
Gabor	6	7	15	1	1	8			1	1	0	0	1	0		0	0	0	0	1	0
Gray	10	3	9	3	7	5			0	0	0	0	0	0		0	0	0	0	0	0
FP 4	Angry	Disgust	Scard	Happy	Sad	Surprised			1	1	0	0	1	0		0	0	0	0	1	0
Gabor	4	15	23	8	39	1			1	1	1	1	1	1		1	1	0	1	1	1
Gray	11	30	30	17	23	4			1	1	0	1	1	0		1	1	0	1	1	1
									0	0	0	0	0	0		0	0	0	0	0	0
									1	1	1	1	1	1		1	1	1	1	1	1
									0	0	0	0	0	0		0	0	0	0	0	0
									1	1	0	0	1	0		0	1	0	0	1	0
									1	1	2	1	4	1		1	1	2	1	1	1
									0	0	0	0	0	0		0	0	0	0	0	0
									1	1	0	1	1	1		1	1	0	1	1	1
									1	2	4	1	4	1		2	4	4	4	4	1
									0	0	0	0	0	0		0	0	0	0	0	0
									1	1	1	1	1	1		1	1	1	1	1	1
									0	0	0	0	0	0		0	0	0	0	0	0
									0	0	0	0	0	0		0	0	0	0	0	0
									1	1	1	1	1	1		1	1	1	1	1	1
									0	0	0	0	0	0		0	0	0	0	0	0
									1	1	1	1	1	1		1	1	1	1	1	1
									1	1	1	1	1	1		1	1	1	1	1	1
									1	1	1	1	1	1		1	1	1	1	1	1
									0	0	0	0	0	0		0	0	0	0	0	0
									0	0	0	0	0	0		0	0	0	0	0	0
									1	1	1	1	1	1		1	1	1	1	1	1
									1	1	2	1	4	1		1	2	2	1	1	1
									0	0	0	0	0	0		0	0	0	0	0	0
									0	0	0	0	0	0		0	0	0	0	0	0
									0	0	0	0	0	0		0	0	0	0	0	0
									1	1	1	1	1	1		1	1	1	1	1	1
									1	1	1	1	1	1		1	1	1	1	1	1
									0	0	0	0	0	0		0	0	0	0	0	0
									0	0	0	0	0	0		0	0	0	0	0	0
									0	0	0	0	0	0		0	0	0	0	0	0
									0	0	0	0	0	0		0	0	0	0	0	0
									1	1	2	1	4	1		1	1	2	1	1	1
									1	1	1	1	1	1		1	1	1	1	1	1
									1	1	2	1	4	1		1	4	4	1	2	1
									0	0	0	0	0	0		0	0	0	0	0	0
									0	0	0	0	0	0		0	0	0	0	0	0
									0	0	0	0	0	0		0	0	0	0	0	0
									1	1	0	0	0	0		0	0	0	0	1	0
									1	2	4	1	4	1		2	4	4	2	4	1
									0	0	0	0	0	0		0	0	0	0	0	0
									1	1	1	1	1	1		1	1	1	1	1	1
									1	2	4	1	4	1		2	4	4	2	4	1
									1	1	0	0	1	0		1	1	0	0	1	1
									1	1	0	0	0	0		0	0	0	0	1	0
									4	4	4	4	4	4		4	4	4	4	4	4
									0	0	0	0	0	0		0	0	0	0	0	0
									1	1	1	1	1	1		1	1	1	1	1	1
									1	1	1	1	1	1		1	1	1	1	1	1
									0	0	0	0	0	0		0	0	0	0	0	0
									0	0	0	0	0	0		0	0	0	0	0	0
									1	1	0	0	1	0		0	1	0	0	1	1
									1	1	0	0	1	0		0	0	0	0	1	0
									1	1	0	0	1	0		0	1	0	0	1	0
									0	0	0	0	0	0		0	0	0	0	0	0
									0	0	0	0	0	0		0	0	0	0	0	0
									1	1	1	1	1	1		1	1	1	1	1	1
									1	1	0	0	0	0		0	0	0	0	1	0
									1	2	4	1	4	1		2	4	4	1	4	1
									1	1	1	1	1	1		1	1	1	1	1	1
									1	1	1	1	1	1		1	1	1	1	1	1
									1	1	1	1	1	1		1	1	1	1	1	1
									2	4	4	4	4	1		4	4	4	4	4	2
									0	0	0	0	0	0		0	0	0	0	0	0
									0	0	0	0	0	0		0	0	0	0	0	0
									0	0	0	0	0	0		0	0	0	0	0	0
									2	4	4	2	4	1		4	4	4	4	4	2
									0	0	0	0	0	0		0	0	0	0	0	0
									1	4	4	1	4	1		2	4	4	4	4	1
									1	1	2	1	4	1		1	4	4	1	2	1
									1	1	2	1	4	1		1	1	2	1	1	1
									0	0	0	0	0	0		0	0	0	0	0	0
									0	0	0	0	0	0		0	0	0	0	0	0
									1	1	1	1	1	1		1	1	1	1	1	1
									1	1	0	0	0	0		0	0	0	0	1	0
									0	0	0	0	0	0		0	0	0	0	0	0
									1	1	1	1	1	1		1	1	1	1	1	1
									1	1	1	1	1	1		1	1	1	1	1	1
									1	1	2	1	4	1		1	4	4	1	2	1
									0	0	0	0	0	0		0	0	0	0	0	0
									4	4	4	4	4	1		4	4	4	4	4	4
									1	1	1	1	1	1		1	1	1	1	1	1
									1	1	1	1	1	1		1	1	1	1	1	1
									0	0	0	0	0	0		0	0	0	0	0	0
									1	1	0	1	1	0		1	1	0	0	1	1
									1	1	1	1	1	1		1	1	1	1	1	1
									2	4	4	1	4	1		4	4	4	4	4	1
									1	1	1	1	1	1		1	1	1	1	1	1
									1	1	1	1	1	1		1	1	1	1	1	1
									0	0	0	0	0	0		0	0	0	0	0	0
									1	1	2	1	4	1		1	4	4	1	2	1
									0	0	0	0	0	0		0	0	0	0	0	0
									0	0	0	0	0	0		0	0	0	0	0	0
									1	1	0	1	1	0		1	1	0	1	1	1
									2	4	4	4	4	1		4	4	4	4	4	2
									1	1	1	1	1	1		1	1	1	1	1	1
									0	0	0	0	0	0		0	0	0	0	0	0
									0	0	0	0	0	0		0	0	0	0	0	0
									1	1	1	1	1	1		1	1	1	1	1	1
									1	1	1	1	1	1		1	1	0	1	1	1
									0	0	0	0	0	0		0	0	0	0	0	0
									0	0	0	0	0	0		0	0	0	0	0	0
									1	4	4	1	4	1		4	4	4	4	4	1
									0	0	0	0	0	0		0	0	0	0	0	0
									0	0	0	0	0	0		0	0	0	0	0	0
									1	1	0	1	1	0		1	1	0	1	1	1
									1	1	1	1	1	1		1	1	1	1	1	1
									1	1	1	1	1	1		1	1	1	1	1	1
									1	1	1	1	1	1		1	1	1	1	1	1
									0	0	0	0	0	0		0	0	0	0	0	0
									4	4	4	4	4	1		4	4	4	4	4	4
									0	0	0	0	0	0		0	0	0	0	0	0
									1	1	0	1	1	0		1	1	0	0	1	1
									1	1	0	1	1	0		1	1	0	1	1	1
									1	1	0	0	0	0		0	0	0	0	1	0
									1	1	1	1	1	1		1	1	1	1	1	1
									0	0	0	0	0	0		0	0	0	0	1	0
									1	1	1	1	1	1		1	1	1	1	1	1
									0	0	0	0	0	0		0	0	0	0	0	0
									0	0	0	0	0	0		0	0	0	0	1	0
									1	1	1	1	1	1		1	1	1	1	1	1
									0	0	0	0	0	0		0	0	0	0	0	0
									0	0	0	0	0	0		0	0	0	0	0	0
									0	0	0	0	0	0		0	0	0	0	0	0
									1	1	1	1	1	1		1	1	1	1	1	1
									1	1	2	1	4	1		1	1	2	1	1	1
									1	1	1	1	1	1		1	1	1	1	1	1
									1	1	1	1	1	1		1	1	1	1	1	1
									1	1	1	1	1	1		1	1	1	1	1	1
									1	1	0	1	1	1		1	1	0	1	1	1
									1	1	1	1	1	1		1	1	1	1	1	1
									1	1	1	1	1	1		1	1	1	1	1	1
									2	4	4	4	4	1		4	4	4	4	4	2
									1	1	0	0	1	0		0	1	0	0	1	1
									1	1	2	1	4	1		1	4	4	1	2	1
									0	0	0	0	0	0		0	0	0	0	0	0
									1	1	1	1	1	1		1	1	1	1	1	1
									0	0	0	0	0	0		0	0	0	0	0	0
									0	0	0	0	0	0		0	0	0	0	0	0
									1	4	4	1	4	1		2	4	4	4	4	1
									0	0	0	0	0	0		0	0	0	0	0	0
									0	0	0	0	0	0		0	0	0	0	0	0
									1	1	1	1	1	1		1	1	1	1	1	1
									1	1	1	1	4	1		1	1	2	1	1	1
									1	1	1	1	1	1		1	1	1	1	1	1
									1	1	0	0	1	0		1	1	0	0	1	1
									1	1	1	1	1	1		1	1	1	1	1	1
									1	1	2	1	4	1		1	4	4	1	2	1
									1	1	1	1	1	1		1	1	1	1	1	1
									1	1	1	1	1	1		1	1	1	1	1	1
									0	0	0	0	0	0		0	0	0	0	0	0
									0	0	0	0	0	0		0	0	0	0	0	0
									1	1	1	1	1	1		1	1	0	1	1	1
									0	0	0	0	0	0		0	0	0	0	0	0
									0	0	0	0	0	0		0	0	0	0	0	0
									1	1	1	1	1	1		1	1	1	1	1	1
									0	0	0	0	0	0		0	0	0	0	0	0
									1	1	1	1	1	1		1	1	1	1	1	1
									1	1	1	1	1	1		1	1	1	1	1	1
									1	1	1	1	1	1		1	1	1	1	1	1
									0	0	0	0	0	0		0	0	0	0	0	0
									1	1	0	1	1	0		1	1	0	0	1	1
									1	4	4	1	4	1		2	4	4	4	4	1
									1	1	1	1	1	1		1	1	1	1	1	1
									1	1	0	1	1	0		1	1	0	1	1	1
									1	1	1	1	1	1		1	1	0	1	1	1
									0	0	0	0	0	0		0	0	0	0	0	0
									1	1	0	0	1	0		0	1	0	0	1	1
									1	1	2	1	4	1		1	4	4	1	2	1
									0	0	0	0	0	0		0	0	0	0	0	0
									0	0	0	0	0	0		0	0	0	0	0	0
									1	1	2	1	4	1		1	1	2	1	1	1
									1	1	2	1	4	1		1	2	2	1	1	1
									0	0	0	0	0	0		0	0	0	0	0	0
									0	0	0	0	0	0		0	0	0	0	0	0
									1	1	1	1	1	1		1	1	1	1	1	1
									0	0	0	0	0	0		0	0	0	0	0	0
									1	1	1	1	1	1		1	1	1	1	1	1
									1	1	0	0	0	0		0	0	0	0	1	0
									1	1	1	1	1	1		1	1	1	1	1	1
									1	4	4	1	4	1		2	4	4	4	4	1
									1	1	1	1	2	1		1	1	1	1	1	1
									0	0	0	0	0	0		0	0	0	0	0	0
									1	2	4	1	4	1		2	4	4	2	4	1
									1	1	1	1	1	1		1	1	1	1	1	1
									0	0	0	0	0	0		0	0	0	0	0	0
									0	0	0	0	0	0		0	0	0	0	0	0
									0	0	0	0	0	0		0	0	0	0	0	0
									4	4	4	4	4	1		4	4	4	4	4	4
									0	0	0	0	0	0		0	0	0	0	0	0
									1	1	1	1	1	1		1	1	0	1	1	1
									1	2	4	1	4	1		1	4	4	1	4	1
									0	0	0	0	0	0		0	0	0	0	0	0
									0	0	0	0	0	0		0	0	0	0	0	0

## Sheet: Figure 3
Experimental results							Raw data	Logistic	Neural Networks	Random Forest	DNN	Rdnn	KmDNN
	Logistic	Neural Networks	Random Forest	DNN	Rdnn	KmDNN		1	2	1	1	1	1
AUC	1.31	1.06	1.06	0.82	1.07	1.32		0	0	0	0	0	0
F-Score	7.71	10.97	11.48	10.72	11.72	11.22		2	2	2	2	1	1
Accuracy	78.03	72.76	80.03	86.54	95.32	92.31		0	0	0	0	0	0
								0	0	0	0	0	0
								1	1	0	0	0	1
Statistical results								0	0	0	0	0	0
	Logistic	Neural Networks	Random Forest	DNN	Rdnn	KmDNN		0	0	0	0	0	0
TP0	67	60	102	94	116	52		2	2	2	1	1	1
FP4	6	8	5	7	7	7		0	0	0	0	0	0
TN1	99	95	68	90	87	145		1	1	1	1	4	1
FN2	41	50	38	22	3	9		0	0	0	0	0	0
								0	0	0	0	0	0
								0	0	0	0	0	0
								1	1	1	1	0	1
								0	0	0	0	0	4
								0	0	0	0	0	0
								0	4	0	0	0	1
								2	2	2	2	1	1
								1	1	0	0	0	1
								1	1	1	1	1	1
								2	2	2	1	1	1
								2	2	2	2	1	1
								1	1	1	1	0	1
								2	2	2	1	1	1
								0	0	0	0	0	0
								1	1	0	0	0	1
								1	1	1	1	1	1
								0	0	0	0	0	0
								1	1	1	1	1	1
								1	1	1	1	1	1
								1	1	1	1	1	1
								2	2	2	2	1	2
								1	1	1	1	1	1
								1	1	0	0	0	1
								0	0	0	0	0	4
								2	2	2	2	1	2
								1	1	1	1	0	1
								1	1	0	4	0	1
								0	0	0	0	0	0
								0	0	0	0	0	0
								1	1	1	1	1	1
								1	1	1	1	1	1
								0	0	0	0	0	0
								0	0	0	0	0	0
								1	1	1	1	1	1
								0	4	0	0	0	1
								1	1	0	0	0	1
								0	0	0	0	0	4
								0	0	0	0	0	0
								0	0	0	0	0	0
								4	4	0	0	0	1
								1	1	1	1	1	1
								2	2	1	1	1	1
								1	1	4	1	0	1
								1	1	0	4	0	1
								1	1	4	1	0	1
								1	1	1	1	1	1
								1	1	0	0	0	1
								1	1	4	1	0	1
								0	0	0	0	0	0
								1	1	1	1	4	1
								0	0	0	0	0	0
								2	2	2	1	1	1
								1	1	1	1	0	1
								2	2	2	1	1	1
								0	0	0	0	0	0
								0	0	0	0	0	0
								0	4	0	0	0	1
								2	2	2	1	1	1
								2	2	2	1	1	1
								1	1	0	0	0	1
								2	2	2	2	1	1
								1	1	1	1	0	1
								1	1	1	1	4	1
								2	2	2	2	2	2
								1	2	1	1	1	1
								1	1	1	1	0	1
								1	2	1	1	1	1
								0	0	0	0	0	0
								1	2	1	1	1	1
								0	0	0	0	0	0
								2	2	2	1	1	1
								1	1	0	0	0	1
								2	2	2	1	1	1
								0	0	0	0	0	0
								0	0	0	0	0	0
								2	2	2	2	1	1
								1	1	4	1	0	1
								2	2	2	1	1	1
								1	1	1	1	1	1
								1	1	1	1	1	1
								1	1	1	1	1	1
								1	1	1	1	4	1
								2	2	2	1	1	1
								0	4	0	0	0	1
								0	0	0	0	0	0
								0	0	0	0	0	0
								0	0	0	0	0	0
								1	1	0	4	0	1
								1	1	1	1	1	1
								0	0	0	0	0	4
								1	2	1	1	1	1
								0	0	0	0	0	0
								1	1	1	1	1	1
								1	2	1	1	1	1
								1	1	0	0	0	1
								0	0	0	0	0	0
								2	2	2	2	1	2
								1	1	1	1	1	1
								1	1	1	1	1	1
								0	0	0	0	0	0
								0	0	0	0	0	0
								0	0	0	0	0	0
								1	1	0	4	0	1
								1	1	1	1	1	1
								1	1	1	1	1	1
								1	1	1	1	1	1
								1	1	0	0	0	1
								1	1	0	0	0	1
								0	0	0	0	0	4
								1	1	1	1	1	1
								0	0	0	0	0	4
								0	0	0	0	0	0
								1	1	1	1	1	1
								2	2	1	1	1	1
								0	0	0	0	0	0
								2	2	2	2	1	1
								1	1	1	1	1	1
								2	2	2	2	1	2
								0	0	0	0	0	0
								1	1	0	0	0	1
								4	1	0	0	0	1
								1	1	1	1	1	1
								1	1	1	1	1	1
								1	1	1	1	1	1
								1	1	1	1	0	1
								1	1	1	1	1	1
								2	2	2	2	1	1
								1	1	1	1	0	1
								1	1	0	4	0	1
								1	1	1	1	4	1
								2	2	2	2	1	1
								1	1	0	4	0	1
								4	1	0	0	0	1
								0	0	0	0	0	0
								1	1	1	1	1	1
								1	1	0	0	0	1
								4	1	0	0	0	1
								0	0	0	0	0	0
								2	2	2	1	1	1
								1	1	0	4	0	1
								0	4	0	0	0	1
								0	0	0	0	0	0
								0	0	0	0	0	0
								1	1	0	0	0	1
								1	1	1	1	4	1
								0	4	0	0	0	1
								0	0	0	0	0	0
								0	0	0	0	0	0
								0	0	0	0	0	0
								1	2	1	1	1	1
								0	0	0	0	0	0
								1	2	1	1	1	1
								1	1	0	0	0	1
								0	0	0	0	0	0
								1	1	1	1	1	1
								1	1	0	0	0	1
								1	1	0	0	0	1
								2	2	2	1	1	1
								1	1	0	0	0	1
								2	2	2	2	1	1
								2	2	2	1	1	1
								0	0	0	0	0	0
								2	2	2	2	1	1
								1	1	1	1	1	1
								2	2	2	1	1	1
								0	0	0	0	0	0
								1	1	1	1	1	1
								1	1	1	1	0	1
								1	1	0	0	0	1
								2	2	2	2	1	2
								1	1	1	1	1	1
								2	2	2	2	1	1
								2	2	2	2	2	2
								1	1	1	1	1	1
								2	2	2	2	2	2
								1	1	1	1	1	1
								0	0	0	0	0	0
								2	2	2	1	1	1
								0	0	0	0	0	4
								0	0	0	0	0	0
								1	1	1	1	1	1
								0	0	0	0	0	1
								2	2	2	2	1	1
								1	1	1	1	1	1
								1	1	0	1	0	1
								1	1	1	1	1	1
								1	1	0	0	0	1
								2	2	2	2	1	2
								0	4	0	0	0	1
								1	1	1	1	1	1
								0	0	0	0	0	0
								1	1	1	1	4	1
								1	2	1	1	1	1
								1	1	1	1	1	1
								1	1	4	1	0	1
								2	2	2	2	1	1
								4	1	0	0	0	1
								4	1	0	0	0	1
								2	2	1	1	1	1
								0	0	0	0	0	0
								1	1	0	0	0	1

## Sheet: Figure 4
Raw data		DNN Training	DNN Testing	rDNN Tranining	rDNN Testing	KmDNN Tranining	KmDNN Testing
	0	0.701035	0.71003	0.707664	0.710855	0.707241	0.7058
	0.1	0.468701	0.475747	0.472728	0.476096	0.475243	0.478483
	0.2	0.227366	0.228512	0.231777	0.231838	0.236807	0.231338
	0.3	0.139395	0.144471	0.146415	0.143098	0.14179	0.146473
	0.4	0.12248	0.12688	0.127612	0.127364	0.127187	0.128748
	0.5	0.105565	0.109288	0.108809	0.111629	0.112583	0.111022
	0.6	0.0980567	0.103436	0.101702	0.105347	0.105362	0.103213
	0.7	0.0896764	0.0963573	0.0932214	0.0976204	0.0965821	0.0945743
	0.8	0.08304	0.091732	0.087487	0.092782	0.090919	0.087594
	0.9	0.072916	0.0822	0.076261	0.082168	0.079023	0.0772975
	1	0.062792	0.072668	0.065035	0.071554	0.067127	0.067001
	1.1	0.0622465	0.070745	0.0664225	0.0706927	0.0655007	0.0654742
	1.2	0.0611364	0.0685631	0.0666417	0.0689173	0.0641535	0.0638949
	1.3	0.0596744	0.066291	0.0660719	0.0667654	0.0629135	0.0622679
	1.4	0.0580436	0.0640616	0.0650231	0.0645523	0.0617308	0.0606457
	1.5	0.06061	0.064976	0.070585	0.068109	0.060622	0.060894
	1.6	0.057806	0.0620175	0.0672992	0.063591	0.0601117	0.059157
	1.7	0.0552883	0.0594747	0.0643626	0.0603097	0.0591933	0.0573869
	1.8	0.0531512	0.0573734	0.0618766	0.057913	0.058183	0.0557789
	1.9	0.0513494	0.0556419	0.0597854	0.056167	0.0571682	0.0543485
	2	0.049394	0.053142	0.057442	0.050037	0.058581	0.053946
	2.1	0.0477352	0.0518465	0.0555525	0.0504657	0.056438	0.0520765
	2.2	0.04674	0.0510692	0.0544188	0.050723	0.0551522	0.0509548
	2.3	0.0459438	0.0504474	0.0535118	0.0509288	0.0541236	0.0500574
	2.4	0.0453068	0.0499499	0.0527863	0.0510934	0.0533006	0.0493396
	2.5	0.042759	0.04796	0.049884	0.051752	0.050009	0.046468
	2.6	0.0477352	0.0518465	0.0555525	0.0504657	0.056438	0.0520765
	2.7	0.0477352	0.0518465	0.0555525	0.0504657	0.056438	0.0520765
	2.8	0.042759	0.04796	0.049884	0.051752	0.050009	0.046468
	2.9	0.0477352	0.0518465	0.0555525	0.0504657	0.056438	0.0520765
	3	0.042759	0.04796	0.049884	0.051752	0.050009	0.046468
	3.1	0.0422688	0.0471898	0.0488161	0.0503127	0.0487598	0.0462622
	3.2	0.0422075	0.0470935	0.0486826	0.0501327	0.0486036	0.0462365
	3.3	0.0421287	0.0469697	0.048511	0.0499014	0.0484029	0.0462034
	3.4	0.0420237	0.0468047	0.0482822	0.049593	0.0481352	0.0461593
	3.5	0.0418766	0.0465736	0.0479618	0.0491612	0.0477604	0.0460976
	3.6	0.041656	0.046227	0.0474812	0.0485135	0.0471982	0.046005
	3.7	0.0412883	0.0456493	0.0466803	0.047434	0.0462613	0.0458507
	3.8	0.040553	0.044494	0.0450785	0.045275	0.0443875	0.045542
	3.9	0.0401118	0.0438008	0.0441174	0.0439796	0.0432632	0.0453568
	4	0.038347	0.041028	0.040273	0.038798	0.038766	0.044616
	4.1	0.0383523	0.0418142	0.0410824	0.0389598	0.0398142	0.0440977
	4.2	0.038353	0.0419125	0.0411836	0.03898	0.0399453	0.0440329
	4.3	0.0383539	0.0420389	0.0413137	0.039006	0.0401137	0.0439496
	4.4	0.038355	0.0422073	0.0414872	0.0390407	0.0403383	0.0438385
	4.5	0.0383566	0.0424432	0.04173	0.0390892	0.0406528	0.043683
	4.6	0.038359	0.042797	0.0420942	0.039162	0.0411245	0.0434498
	4.7	0.038363	0.0433867	0.0427013	0.0392833	0.0419107	0.043061
	4.8	0.038371	0.044566	0.0439155	0.039526	0.043483	0.0422835
	4.9	0.0383758	0.0452736	0.044644	0.0396716	0.0444264	0.041817
	5	0.038395	0.048104	0.047558	0.040254	0.0482	0.039951
	5.1	0.038424	0.0481185	0.047668	0.0393615	0.046185	0.044188
	5.2	0.038453	0.048133	0.047778	0.038469	0.04417	0.048425
	5.3	0.0226433	0.02615	0.0264153	0.0239693	0.0251813	0.0288477
	5.4	0.0173734	0.0188223	0.0192944	0.0191361	0.0188518	0.0223219
	5.5	0.0156168	0.0163798	0.0169208	0.017525	0.0167419	0.0201466
	5.6	0.029477	0.030317	0.031468	0.033439	0.031374	0.038118
	5.7	0.0219317	0.0236163	0.022652	0.0245907	0.0241943	0.0254917
	5.8	0.0194166	0.0213828	0.0197133	0.0216412	0.0218011	0.0212829
	5.9	0.0185782	0.0206383	0.0187338	0.0206581	0.0210034	0.01988
	6	0.036318	0.040532	0.036488	0.040333	0.041209	0.038357
	6.1	0.0219737	0.0256167	0.0234593	0.0254567	0.0248637	0.025798
	6.2	0.0171922	0.0206449	0.0191164	0.0204979	0.0194152	0.0216117
	6.3	0.0155984	0.0189876	0.0176688	0.018845	0.0175991	0.0202162
	6.4	0.029603	0.036318	0.03389	0.036037	0.033382	0.039037
	6.5	0.0182493	0.0231333	0.0228503	0.0229783	0.020416	0.0222303
	6.6	0.0144648	0.0187384	0.0191704	0.0186254	0.016094	0.0166281
	6.7	0.0132033	0.0172735	0.0179438	0.0171745	0.0146533	0.0147607
	6.8	0.025145	0.033082	0.034661	0.032898	0.027866	0.027654
	6.9	0.0167807	0.02022	0.0221917	0.0215283	0.0202113	0.0179247
	7	0.0139926	0.0159327	0.0180352	0.0177384	0.0176598	0.0146816
	7.1	0.0130632	0.0145036	0.0166497	0.0164751	0.0168093	0.0136005
	7.2	0.025197	0.027578	0.031914	0.031687	0.032768	0.02612
	7.3	0.0183193	0.0210553	0.0209773	0.0226617	0.0228317	0.0216013
	7.4	0.0160268	0.0188811	0.0173318	0.0196532	0.0195196	0.0200951
	7.5	0.0152626	0.0181564	0.0161166	0.0186504	0.0184155	0.019593
	7.6	0.029761	0.035588	0.031018	0.036298	0.035727	0.038684
	7.7	0.019101	0.0234183	0.022509	0.0224967	0.0242547	0.024359
	7.8	0.0155477	0.0193618	0.0196727	0.0178962	0.0204306	0.019584
	7.9	0.0143632	0.0180096	0.0187272	0.0163627	0.0191559	0.0179923
	8	0.027542	0.034667	0.036509	0.031192	0.037037	0.034393
	8.1	0.0176237	0.022084	0.0211273	0.0191737	0.0238503	0.0230363
	8.2	0.0143176	0.0178897	0.0160001	0.0151676	0.0194548	0.0192508
	8.3	0.0132155	0.0164916	0.014291	0.0138322	0.0179896	0.0179889
	8.4	0.025329	0.031585	0.026873	0.026329	0.034514	0.034716
	8.5	0.0169053	0.0193973	0.0186777	0.0189	0.021261	0.02109
	8.6	0.0140974	0.0153348	0.0159459	0.0164237	0.0168433	0.016548
	8.7	0.0131615	0.0139806	0.0150353	0.0155982	0.0153708	0.015034
	8.8	0.025387	0.026607	0.02916	0.030371	0.029269	0.028554
	8.9	0.0169367	0.020077	0.0193857	0.021633	0.0195463	0.020533
	9	0.0141199	0.0179003	0.0161276	0.0187203	0.0163054	0.0178593
	9.1	0.013181	0.0171748	0.0150415	0.0177494	0.0152251	0.0169681
	9.2	0.025423	0.033624	0.028997	0.034528	0.02937	0.033045
	9.3	0.0169663	0.0226927	0.019019	0.0229557	0.021475	0.021958
	9.4	0.0141474	0.0190489	0.015693	0.0190982	0.0188433	0.0182623
	9.5	0.0132078	0.0178343	0.0145843	0.0178124	0.0179661	0.0170304
	9.6	0.025476	0.034454	0.02806	0.034339	0.035055	0.032829
	9.7	0.0170017	0.021191	0.017963	0.0224717	0.0233787	0.0225257
	9.8	0.0141769	0.01677	0.0145973	0.0185159	0.0194866	0.0190912
	9.9	0.0132353	0.0152963	0.0134754	0.0171973	0.0181892	0.0179464
	10	0.025529	0.029119	0.025829	0.033076	0.035081	0.034748
	10.1	0.0169527	0.0202347	0.0175673	0.0198017	0.0231983	0.0231547
	10.2	0.0140939	0.0172732	0.0148134	0.0153769	0.0192374	0.0192902
	10.3	0.013141	0.0162861	0.0138955	0.013902	0.0179171	0.0180021
	10.4	0.025329	0.031585	0.026873	0.026329	0.034514	0.034716
	10.5	0.0169053	0.0193973	0.0186777	0.0189	0.021261	0.02109
	10.6	0.0140974	0.0153348	0.0159459	0.0164237	0.0168433	0.016548
	10.7	0.0131615	0.0139806	0.0150353	0.0155982	0.0153708	0.015034
	10.8	0.025387	0.026607	0.02916	0.030371	0.029269	0.028554
	10.9	0.0132501	0.0148722	0.0159624	0.0155779	0.0161416	0.0155154
	11	0.00920443	0.0109606	0.0115632	0.0106469	0.0117658	0.0111693
	11.1	0.0155477	0.0193618	0.0196727	0.0178962	0.0204306	0.019584
	11.2	0.0143632	0.0180096	0.0187272	0.0163627	0.0191559	0.0179923
	11.3	0.027542	0.034667	0.036509	0.031192	0.037037	0.034393
	11.4	0.0176237	0.022084	0.0211273	0.0191737	0.0238503	0.0230363
	11.5	0.0143176	0.0178897	0.0160001	0.0151676	0.0194548	0.0192508
	11.6	0.0132155	0.0164916	0.014291	0.0138322	0.0179896	0.0179889
	11.7	0.025329	0.031585	0.026873	0.026329	0.034514	0.034716
	11.8	0.106316	0.866093	0.759501	0.64153	0.402843	1.12764
	11.9	0.647853	0.183815	0.787469	0.186549	0.866442	0.657408
	12	0.02117	0.02966	0.021665	0.021942	0.030425	0.027065
	12.1	0.0155477	0.0193618	0.0196727	0.0178962	0.0204306	0.019584
	12.2	0.0143632	0.0180096	0.0187272	0.0163627	0.0191559	0.0179923
	12.3	0.027542	0.034667	0.036509	0.031192	0.037037	0.034393
	12.4	0.0176237	0.022084	0.0211273	0.0191737	0.0238503	0.0230363
	12.5	0.0143176	0.0178897	0.0160001	0.0151676	0.0194548	0.0192508
	12.6	0.0132155	0.0164916	0.014291	0.0138322	0.0179896	0.0179889
	12.7	0.025329	0.031585	0.026873	0.026329	0.034514	0.034716
	12.8	0.948778	0.314413	1.0784	0.425215	0.642442	0.832726
	12.9	0.45408	1.0951	0.732507	0.836506	0.930176	1.1926
	13	0.92232	0.684954	0.515405	1.15791	1.11742	0.186494
	13.1	0.8076	0.320238	0.674637	0.748548	0.417424	0.754678
	13.2	0.699675	0.148745	0.822255	0.512013	0.436057	0.609588
	13.3	0.709947	0.599258	0.0488468	1.15057	0.287076	0.12506
	13.4	0.299394	0.849013	0.0785034	0.0048442	0.0174009	0.403595
	13.5	0.984349	1.02588	0.717534	0.953938	0.440953	0.764151
	13.6	1.00733	0.535604	0.61083	0.565567	0.202367	0.637699
	13.7	1.13743	0.961904	0.90862	0.35644	0.717448	0.960974
	13.8	0.947241	0.281916	0.802272	0.753498	0.247326	0.42611
	13.9	0.0932063	0.606483	0.419257	0.671307	0.333518	0.448132
	14	0.021375	0.022209	0.027454	0.027064	0.024768	0.029734
	14.1	0.0209353	0.0227666	0.0269257	0.0260573	0.0248536	0.0289905
	14.2	0.0208804	0.0228363	0.0268596	0.0259315	0.0248643	0.0288976
	14.3	0.0208097	0.0229259	0.0267747	0.0257697	0.0248781	0.0287781
	14.4	0.0207155	0.0230454	0.0266615	0.0255539	0.0248964	0.0286188
	14.5	0.016948	0.026724	0.022182	0.017247	0.026754	0.022552
	14.6	0.0172091	0.0270037	0.0224692	0.0176673	0.0260788	0.0228246
	14.7	0.0172418	0.0270386	0.0225051	0.0177199	0.0259944	0.0228586
	14.8	0.0172837	0.0270836	0.0225513	0.0177874	0.0258859	0.0229024
	14.9	0.0173397	0.0271435	0.0226128	0.0178775	0.0257412	0.0229608
	15	0.017418	0.0272274	0.022699	0.0180036	0.0255386	0.0230426
	15.1	0.0175355	0.0273533	0.0228283	0.0181928	0.0252348	0.0231653
	15.2	0.0177313	0.027563	0.0230437	0.018508	0.0247283	0.0233697
	15.3	0.018123	0.0279825	0.0234745	0.0191385	0.0237155	0.0237785
	15.4	0.018358	0.0282342	0.023733	0.0195168	0.0231078	0.0240238
	15.5	0.019298	0.029241	0.024767	0.02103	0.020677	0.025005
	15.6	0.0106307	0.0146033	0.0139653	0.0116273	0.012148	0.0133383
	15.7	0.00580617	0.00729308	0.00777358	0.00636983	0.00697875	0.00708708
	15.8	0.00460004	0.00546552	0.00622565	0.00505546	0.00568644	0.00552427
	15.9	0.00429851	0.00500863	0.00583866	0.00472686	0.00536336	0.00513357
	16	0.012594	0.014569	0.017129	0.013852	0.015767	0.01501
	16.1	0.0106743	0.0126893	0.0122523	0.0130333	0.012202	0.01194
	16.2	0.00752583	0.00904708	0.00797008	0.00957033	0.00826025	0.0081875
	16.3	0.00673871	0.00813652	0.00689952	0.00870458	0.00727481	0.00724937
	16.4	0.00654193	0.00790888	0.00663188	0.00848815	0.00702845	0.00701484
	16.5	0.019429	0.023499	0.019628	0.025248	0.020839	0.02081
	16.6	0.010727	0.015291	0.0114773	0.0150177	0.0121017	0.0115557
	16.7	0.00586975	0.00941625	0.00657033	0.00870567	0.00689192	0.00635317
	16.8	0.00465544	0.00794756	0.00534358	0.00712767	0.00558948	0.00505254
	16.9	0.00435186	0.00758039	0.0050369	0.00673317	0.00526387	0.00472739
	17	0.012752	0.022374	0.014804	0.019805	0.015466	0.013857
	17.1	0.0132614	0.0218667	0.0159173	0.020562	0.0166193	0.0152306
	17.2	0.0133251	0.0218032	0.0160565	0.0206566	0.0167635	0.0154022
	17.3	0.013407	0.0217217	0.0162354	0.0207783	0.0169489	0.015623
	17.4	0.0135162	0.021613	0.016474	0.0209405	0.017196	0.0159173
	17.5	0.013669	0.0214608	0.016808	0.0211676	0.017542	0.0163294
	17.6	0.0138983	0.0212325	0.017309	0.0215082	0.018061	0.0169475
	17.7	0.0142803	0.020852	0.018144	0.022076	0.018926	0.0179777
	17.8	0.0150445	0.020091	0.019814	0.0232115	0.020656	0.020038
	17.9	0.015503	0.0196344	0.020816	0.0238928	0.021694	0.0212742
	18	0.017337	0.017808	0.024824	0.026618	0.025846	0.026219
	18.1	0.0108307	0.0134473	0.0163883	0.016379	0.0165953	0.0153817
	18.2	0.00649642	0.00899533	0.0101823	0.0097245	0.0101338	0.00882692
	18.3	0.00541285	0.00788233	0.00863083	0.00806088	0.00851846	0.00718823
	18.4	0.00514196	0.00760408	0.00824296	0.00764497	0.00811461	0.00677856
	18.5	0.015155	0.022534	0.024341	0.022519	0.02394	0.019926
	18.6	0.009374	0.0142717	0.0133813	0.0147413	0.014959	0.011097
	18.7	0.00558525	0.00863817	0.00729608	0.00911158	0.008974	0.0061155
	18.8	0.00463806	0.00722979	0.00577477	0.00770415	0.00747775	0.00487013
	18.9	0.00440127	0.0068777	0.00539444	0.00735229	0.00710369	0.00455878
	19	0.012967	0.020281	0.015803	0.021705	0.020937	0.013365
	19.1	0.0119721	0.019442	0.0154999	0.0204017	0.01936	0.0123662
	19.2	0.0118477	0.0193371	0.015462	0.0202387	0.0191629	0.0122414
	19.3	0.0116879	0.0192023	0.0154133	0.0200293	0.0189094	0.0120809
	19.4	0.0114747	0.0190225	0.0153483	0.01975	0.0185715	0.0118668
	19.5	0.0111762	0.0187708	0.0152574	0.019359	0.0180984	0.0115672
	19.6	0.0107285	0.0183932	0.015121	0.0187725	0.0173887	0.0111177
	19.7	0.00998233	0.017764	0.0148937	0.017795	0.016206	0.0103687
	19.8	0.00849	0.0165055	0.014439	0.01584	0.0138405	0.0088705
	19.9	0.0075946	0.0157504	0.0141662	0.014667	0.0124212	0.0079716
	20	0.004013	0.01273	0.013075	0.009975	0.006744	0.004376
	20.1	0.827194	0.42336	0.380558	0.0268201	0.236233	0.362094
	20.2	0.638071	0.590089	0.127212	0.423394	0.089431	1.0899
	20.3	0.704793	1.11829	0.679715	1.00536	0.644335	1.08478
	20.4	0.195691	0.125339	0.0280282	0.0698495	1.14141	0.398176
	20.5	0.729703	1.03983	1.16226	0.193954	0.0998166	0.143258
	20.6	0.148089	1.1368	0.526214	0.707659	0.152585	0.987695
	20.7	1.02911	0.386527	0.823553	0.165896	0.779526	0.434127
	20.8	0.979788	0.318943	1.09462	0.851358	0.0177666	1.12571
	20.9	0.143665	0.0800867	0.629903	0.874135	0.026336	0.123315
	21	0.298677	0.871183	0.0562346	1.11764	0.145586	0.73125
	21.1	0.467292	1.1156	0.0140727	0.328142	0.340801	1.04748
	21.2	0.17115	1.18682	1.16165	0.274706	0.43635	0.334402
	21.3	1.19998	0.819697	0.0058697	0.743709	0.217958	0.399759
	21.4	1.11385	0.870183	1.1408	0.135464	0.22644	0.192161
	21.5	0.363053	0.470617	0.419872	0.142865	0.0849065	0.448123
	21.6	0.236366	0.765232	1.20701	0.0049238	0.282118	0.252126
	21.7	0.811674	0.348742	0.0147218	0.563701	0.255029	0.391756
	21.8	0.530134	0.778484	0.318953	0.780521	0.101842	0.467027
	21.9	1.02277	0.0355479	0.428225	0.551269	1.05169	0.238524
	22	1.11487	0.846	0.657178	0.53552	0.606446	1.02273
	22.1	0.420511	0.162185	1.10831	0.257874	0.663679	0.574611
	22.2	0.605251	0.765673	0.239729	0.964452	0.367303	1.14743
	22.3	1.00799	1.15167	1.13273	0.0933341	0.646642	0.552419
	22.4	0.969885	0.889369	0.32801	0.186742	0.697385	1.09227
	22.5	1.00061	0.687577	0.0207283	0.665129	1.17084	0.321996
	22.6	0.975557	1.07804	0.166014	0.582574	0.712957	0.589617
	22.7	0.334021	0.0387077	0.939661	1.18999	0.209045	0.868263
	22.8	1.1876	0.267523	0.159353	0.75511	0.812981	0.544139
	22.9	0.007006	0.0310557	1.0517	0.375702	0.0729192	0.749915
	23	0.145298	0.299018	0.783632	0.718409	0.114613	0.871659
	23.1	0.217924	0.412355	0.424439	0.427827	0.727904	0.477657
	23.2	1.03503	0.681699	0.0346473	0.360241	0.565818	0.549842
	23.3	0.490695	0.648153	0.989168	0.685865	0.935145	1.04344
	23.4	1.09375	0.936217	0.494368	0.606721	0.660317	0.0605744
	23.5	0.948372	1.17769	0.134514	0.622459	0.864872	0.045198
	23.6	1.11866	0.999222	0.240963	0.221264	0.669489	0.0267883
	23.7	0.330395	0.38773	0.0592232	1.00974	0.93284	1.07431
	23.8	0.0024583	0.0869042	0.98949	0.765643	0.574747	0.625634
	23.9	0.474475	0.1933	0.156887	0.46534	0.489678	0.739311
	24	1.00503	0.536308	0.140907	0.971785	0.468431	0.0277956
	24.1	0.15332	0.856888	0.835496	0.0023885	0.145121	0.411139
	24.2	0.624598	0.285923	1.04674	0.100409	0.480574	0.101912
	24.3	0.734578	0.135398	1.15135	0.26637	1.04019	0.922469
	24.4	0.546752	0.620138	1.02259	1.15903	1.02725	1.12929
	24.5	0.344384	0.532073	1.2004	0.610263	0.0121095	1.16529
	24.6	1.1271	0.875601	0.479372	0.953514	0.515892	0.591746
	24.7	0.361677	1.11056	0.853672	1.00352	0.253372	0.0628878
	24.8	0.502595	1.07428	0.0061064	0.291791	0.256844	0.230121
	24.9	0.533839	0.836014	0.28692	0.0407896	0.805495	0.689012
	25	0.349807	0.735309	1.05942	0.968742	1.19697	0.372724
	25.1	0.372732	0.897177	0.793219	0.705764	0.0644487	0.638653
	25.2	0.981629	0.875439	0.608208	0.927565	0.999992	0.0088212
	25.3	0.214181	1.04542	0.231368	0.630191	0.117362	0.144968
	25.4	0.203385	0.536898	0.0860126	0.127423	0.0973394	0.940392
	25.5	0.222593	0.0001907	0.123883	0.0048198	0.388504	0.965226
	25.6	0.0967312	0.495018	0.328551	0.44405	0.367532	0.0551301
	25.7	0.425323	1.03866	0.43303	0.741552	0.546592	1.08104
	25.8	0.766061	0.354007	0.266823	0.122161	0.460541	0.61195
	25.9	0.005481	0.73864	0.611024	0.88004	0.912146	0.452851
	26	1.03044	0.0807412	1.14224	1.00875	0.0200776	0.770312
	26.1	0.0791828	0.758305	0.0264937	0.21132	0.997403	0.498529
	26.2	0.641934	1.19515	0.743454	0.264308	0.038632	1.16571
	26.3	0.343925	1.07831	0.368368	0.254999	0.78403	1.08716
	26.4	0.361554	0.879881	1.19322	1.1643	0.949626	0.962791
	26.5	0.488902	0.0307397	0.553885	0.0509819	0.388587	0.691485
	26.6	0.0803346	0.80795	0.903108	0.62518	1.19775	1.15278
	26.7	0.656324	0.203728	0.636297	0.297466	0.815072	0.275908
	26.8	1.07195	0.0406113	0.232818	0.796287	0.417945	0.9643
	26.9	0.902328	0.54337	0.389334	0.953633	0.886644	0.701927
	27	0.472954	0.181622	0.414237	0.145885	0.229405	0.0257247
	27.1	0.0203015	1.05797	0.0317716	1.05241	1.16283	1.09948
	27.2	0.346952	1.13922	0.355033	0.108734	0.125589	1.13139
	27.3	1.02497	1.2015	1.16459	0.667068	0.977502	0.140956
	27.4	0.478909	1.08471	0.200347	1.16295	1.02953	0.935296
	27.5	0.116731	0.318094	0.720671	0.202644	0.437155	0.588777
	27.6	0.718863	1.1251	0.600282	0.79573	0.525358	1.0895
	27.7	0.0211334	0.257038	0.694273	0.151224	0.485649	0.755159
	27.8	0.432677	0.866534	0.584598	0.209518	0.100706	0.391158
	27.9	0.151414	0.181273	0.380986	1.0242	0.0215094	0.235674
	28	0.192599	0.0878923	0.66491	0.969305	0.924072	1.16094
	28.1	0.180766	1.01795	0.0822525	0.126733	0.27248	0.330818
	28.2	1.08683	0.0181853	0.621934	0.291177	1.08969	0.831391
	28.3	1.1913	0.625783	0.209758	0.131978	0.421218	1.06004
	28.4	0.0303618	1.10429	0.0744411	1.05344	0.838276	0.308704
	28.5	0.443168	0.87471	0.979894	0.563796	0.949144	0.203462
	28.6	0.0552122	0.261827	0.769038	0.659083	0.545454	0.260173
	28.7	1.11619	0.852391	1.06653	0.605782	1.17442	0.316406
	28.8	0.678324	0.533174	1.0024	0.875396	1.06105	0.912083
	28.9	0.594637	0.698277	0.954574	1.17858	0.141376	1.03399
	29	1.06552	0.403591	1.14373	0.355349	0.565225	1.04265
	29.1	0.0563481	0.300947	0.875786	0.193092	1.18414	0.0153193
	29.2	0.165122	0.874573	0.427069	1.1797	0.311714	1.06334
	29.3	0.635221	0.751683	0.848121	0.325218	0.713194	0.922087
	29.4	1.12056	0.0966916	1.01235	0.967815	0.653347	1.04177
	29.5	1.05206	0.989384	1.1368	0.135298	0.244773	1.13571
	29.6	0.0330554	1.08458	0.646812	0.32142	0.368941	0.674038
	29.7	0.898427	0.481767	0.57093	1.13814	0.259419	1.00217
	29.8	0.252035	0.362498	0.2948	0.0925426	1.08213	0.0880466
	29.9	1.19113	0.5745	0.778789	0.111365	0.41161	0.961562
	30	0.279807	0.998099	0.312152	0.187924	1.15539	0.688152
	30.1	0.334846	0.775473	0.32229	0.183456	0.606615	0.94444
	30.2	0.39989	0.96146	1.07335	0.0751404	1.01055	0.92038
	30.3	1.02549	0.53187	0.791623	0.061399	0.754038	0.939114
	30.4	0.534615	0.385121	0.209741	0.303308	0.892306	1.12523
	30.5	0.451072	0.111257	0.119669	0.673123	0.333951	0.152349
	30.6	1.19468	0.293532	0.0958327	0.728236	0.123069	0.340026
	30.7	1.04997	0.82418	0.898898	0.503629	1.10662	1.05366
	30.8	0.606869	0.627645	0.262716	0.416456	0.671716	1.15998
	30.9	0.506613	0.781017	0.487117	0.542941	1.13395	3.02e-05
	31	0.719009	0.786805	0.464745	0.898479	0.552829	1.151
	31.1	0.871136	1.09731	0.242986	0.735201	0.812488	0.615789
	31.2	0.78994	0.842825	0.705817	0.415839	0.68443	1.03943
	31.3	0.729665	0.141606	0.508571	0.939662	1.07135	0.322509
	31.4	0.807498	0.515068	0.747974	0.616437	1.14147	0.197007
	31.5	0.701321	0.720454	0.312449	0.587663	0.270882	1.0451
	31.6	0.356354	0.904969	0.118596	1.18747	0.558271	0.328264
	31.7	0.140612	0.741174	0.243214	0.272308	0.570374	0.478607
	31.8	1.02093	0.125354	0.114597	0.866122	0.551489	1.01222
	31.9	0.891849	1.10415	0.299245	0.19872	0.498196	0.456839
	32	0.766845	0.0391626	1.03533	0.708478	0.943057	1.19739
	32.1	1.07603	0.747399	1.04314	0.0385343	1.11272	0.324116
	32.2	0.470115	0.372447	0.538951	0.321151	0.131062	0.237638
	32.3	0.430804	0.916381	0.117243	0.861515	0.699542	0.10345
	32.4	1.14002	0.871518	1.00953	1.18807	1.14306	1.04257
	32.5	0.818132	0.142151	0.708678	0.443205	0.981514	0.873252
	32.6	0.841125	0.604596	1.12468	0.497328	0.675116	0.82581
	32.7	0.954883	0.984976	1.06963	0.304883	0.328826	0.214006
	32.8	1.05674	1.15741	1.19257	0.201933	0.366256	1.086
	32.9	0.319739	1.02014	0.0051973	0.308983	0.72029	0.190174
	33	0.135509	0.139322	0.263	0.42171	0.28419	0.511643
	33.1	0.514431	0.824406	1.07447	0.0164137	0.343358	0.249001
	33.2	0.28	0.924409	0.620681	0.182549	1.05206	1.12304
	33.3	0.391963	0.0564726	0.868556	1.08547	0.117992	0.59927
	33.4	0.864931	0.511989	0.914201	1.14697	0.0842586	0.810326
	33.5	1.1231	0.695777	0.2086	0.63748	0.293638	0.219783
	33.6	0.686597	0.480551	1.19638	0.0365456	0.373215	0.649554
	33.7	0.0893341	0.0977402	1.02817	0.311813	0.487546	0.123334
	33.8	0.979063	0.169526	0.0725324	0.752008	1.05476	0.240054
	33.9	0.740889	0.617681	0.695159	0.863316	0.526373	0.339542
	34	0.193439	1.11303	0.463362	1.20385	1	1.06942
	34.1	0.973141	0.543546	0.616054	0.281111	0.47043	1.03299
	34.2	0.642327	0.455336	0.83639	0.388553	0.222239	0.520266
	34.3	0.471784	0.0105796	0.0009658	0.835798	0.0932032	1.17947
	34.4	0.777256	0.170135	0.0994679	0.739555	0.664635	0.455603
	34.5	0.325228	1.20665	0.174404	0.112441	0.893199	0.823947
	34.6	0.654836	0.377208	0.168021	0.537497	0.215344	0.634467
	34.7	1.13989	0.496225	0.564016	0.577257	1.00325	0.442475
	34.8	0.1299	0.728787	0.834575	0.383854	0.873132	0.545128
	34.9	0.902313	0.0853397	0.724773	1.11977	0.5768	0.915695
	35	0.955174	0.413786	1.06871	0.831299	0.227687	1.07997
	35.1	1.01543	1.07868	0.551017	0.286467	0.175516	0.0902991
	35.2	0.64178	0.889491	0.927739	0.155506	0.609088	0.693338
	35.3	1.00351	1.00849	0.137961	0.331398	0.320177	0.053506
	35.4	0.589542	1.18071	0.278285	1.01276	0.739799	1.08473
	35.5	0.390272	1.19094	0.0302697	0.20166	0.394444	0.783576
	35.6	0.269458	0.794335	0.435233	0.604733	0.86601	0.649828
	35.7	0.886151	0.137057	0.236792	0.956755	0.944809	0.0130429
	35.8	0.0156065	0.281705	0.987103	0.501989	0.49917	0.624525
	35.9	0.854541	0.492834	0.807067	1.16841	1.0631	0.46971
	36	0.746694	0.188954	0.445075	0.558429	0.158056	0.757178
	36.1	0.939526	0.656448	0.327045	0.8637	0.713909	0.900995
	36.2	0.903112	0.967581	0.958774	0.485425	0.128762	0.269565
	36.3	0.89732	0.34508	0.236459	0.002465	0.880847	0.35892
	36.4	0.832654	1.20165	0.905286	0.747038	0.708263	1.16052
	36.5	0.639426	0.476606	0.340922	0.518381	0.4311	1.11589
	36.6	0.109831	1.16108	0.803286	1.06873	0.725325	0.879504
	36.7	0.2713	0.671464	0.786397	1.16465	1.02278	0.556518
	36.8	1.05213	0.237416	0.341165	0.479219	0.895812	0.235929
	36.9	0.899735	0.954834	0.986058	0.854482	0.458444	0.661233
	37	1.17015	0.46981	1.02324	0.928912	0.508617	0.699664
	37.1	0.0283847	0.748154	0.0245024	0.83868	1.04285	0.581369
	37.2	0.716128	0.41661	0.593465	0.228968	1.15047	1.13748
	37.3	0.126082	0.211121	0.323389	1.08096	0.256899	1.07822
	37.4	0.22054	0.237452	0.0494863	0.126733	0.94637	0.924002
	37.5	0.856685	0.746865	0.390161	0.144169	0.230229	0.749937
	37.6	0.0564945	0.400562	0.906727	0.0390385	0.693221	0.246358
	37.7	0.809973	1.16366	0.284235	0.544713	0.418776	0.91891
	37.8	0.151975	0.956737	0.615965	0.201459	0.995978	1.09599
	37.9	0.783103	1.13427	0.227921	0.254245	0.777148	0.0600069
	38	0.43765	0.724954	0.867383	0.297727	0.530303	0.0171657
	38.1	0.648683	0.667538	0.121564	0.0225536	1.04319	0.83736
	38.2	0.795129	0.0148098	0.349694	0.770897	0.666185	0.565167
	38.3	1.11412	1.11562	0.0909362	0.510765	0.802291	0.0523653
	38.4	0.415544	0.269543	0.278458	0.356168	1.15598	0.563469
	38.5	0.718522	0.469848	1.18707	0.652407	0.705812	1.13602
	38.6	0.213643	0.773485	1.0591	0.435983	1.06322	0.773711
	38.7	0.472998	0.237899	0.0220837	1.03225	1.19305	0.0389262
	38.8	0.179733	0.560224	0.743856	0.551069	0.481855	0.741215
	38.9	1.10684	0.581392	0.681379	1.14657	1.04674	0.583838
	39	0.0870199	0.576422	0.711785	0.512251	0.60523	1.0579
	39.1	0.0052089	3e-06	0.60039	0.550066	0.239115	1.16821
	39.2	0.527243	0.961408	0.0399175	1.12129	0.725229	0.205017
	39.3	0.567284	0.42192	0.773535	0.397304	0.938467	0.590615
	39.4	0.787722	0.881648	0.945933	0.804708	0.248234	0.627124
	39.5	0.305359	0.180752	1.1691	1.05983	0.273993	0.411753
	39.6	0.331465	0.538397	0.25767	0.942915	0.87138	0.23476
	39.7	0.0698295	0.912273	1.18309	1.11794	0.974612	0.634374
	39.8	0.0561999	1.08197	0.471224	0.174017	0.353882	0.839816
	39.9	1.1333	0.444558	0.714502	0.870782	0.598633	0.706175
	40	0.907176	0.956986	0.908332	0.317409	1.02111	0.784566
	40.1	0.340964	0.646875	0.0460186	0.806392	0.116205	0.436552
	40.2	0.840283	0.183774	0.298789	0.0502364	0.422003	0.816526
	40.3	0.596514	0.197141	0.144492	1.1987	0.0637571	0.589568
	40.4	0.985854	0.20748	0.0429329	0.924811	0.331145	0.515836
	40.5	0.0582139	0.602562	1.14113	1.05414	0.741687	0.378618
	40.6	0.852104	0.384686	0.537511	0.518689	1.17542	0.579353
	40.7	0.731273	0.375098	0.673059	0.233887	0.146048	1.17564
	40.8	0.0830116	0.948542	0.558184	0.407294	0.769424	0.10752
	40.9	0.352273	0.959746	0.974975	0.552362	0.316861	1.01799
	41	0.350415	0.0216206	0.273268	0.65696	0.2489	0.0421718
	41.1	0.245136	0.484589	1.124	0.615386	1.17602	0.701043
	41.2	0.815412	0.0314548	0.943475	1.0919	1.1441	1.13692
	41.3	0.106836	1.20328	1.14894	0.441334	0.766191	1.16351
	41.4	1.16641	0.924688	0.616082	1.18045	0.19051	0.49257
	41.5	0.389233	0.879566	0.290665	0.568231	0.601547	0.814399
	41.6	0.651383	0.804657	0.0376916	0.31413	1.04973	0.223
	41.7	0.260129	0.243685	1.18574	0.653798	0.89447	0.830957
	41.8	0.503756	0.141912	0.0194835	1.05686	0.888888	0.99606
	41.9	0.345323	0.158752	1.05875	0.335157	0.285081	0.0386764
	42	1.12616	0.563906	0.323896	0.345015	0.643372	0.239031
	42.1	0.250094	0.18702	0.773548	0.982723	0.296728	1.162
	42.2	1.04211	0.371674	0.543569	0.867604	1.03947	1.10809
	42.3	0.922659	0.663894	0.560358	1.05983	0.780827	0.595051
	42.4	0.224649	0.393723	0.0145341	0.33519	0.751213	0.174138
	42.5	0.427853	1.11092	1.12224	0.499418	0.170817	0.96009
	42.6	0.583497	0.216484	0.396027	0.954376	0.0530203	0.9986
	42.7	0.158895	0.43603	0.393174	0.398214	0.306549	0.878545
	42.8	0.362195	0.257956	0.790647	0.850036	0.0685657	0.98454
	42.9	0.476411	0.599666	0.255008	1.12872	1.15946	0.708331
	43	0.204249	0.731025	0.251839	0.0383769	1.17507	0.916479
	43.1	0.347765	0.783006	0.321714	0.537882	0.0663888	0.137879
	43.2	1.01656	0.802872	0.784135	0.694561	0.594255	0.729922
	43.3	0.216878	0.181565	0.255057	1.2033	0.691114	0.822899
	43.4	0.428788	0.847395	0.79176	1.01577	0.655981	0.800022
	43.5	0.945179	0.386491	0.0818856	0.963633	0.135657	0.123526
	43.6	0.99696	0.605951	0.285729	0.255645	0.980126	0.63819
	43.7	0.49234	0.805399	1.04838	0.422074	0.268237	0.700538
	43.8	1.06075	1.20307	0.511763	0.694028	1.02555	1.14592
	43.9	1.11587	0.0350694	0.306882	0.962285	1.1737	0.848982
	44	0.280093	0.484814	0.769103	0.0599295	0.034527	0.283051
	44.1	1.09224	0.324416	0.769328	1.11493	0.527265	0.103855
	44.2	0.564724	0.0669564	0.485371	0.468565	0.468656	0.0496457
	44.3	0.697738	0.781748	0.483826	0.430458	1.05957	0.0403723
	44.4	0.978901	0.816222	0.615622	0.556395	0.264866	0.466606
	44.5	1.04651	0.587516	1.09814	0.378059	0.482203	1.15821
	44.6	1.07534	0.446923	0.380705	1.13077	0.545319	0.882177
	44.7	0.933635	1.12834	0.298839	0.499457	0.592815	0.0617523
	44.8	0.351772	0.146694	0.665033	0.299113	0.712537	0.0104901
	44.9	0.129219	1.1517	0.416329	0.665089	1.00942	0.488602
	45	1.16704	0.0603039	0.838531	0.861718	0.271234	0.51025
	45.1	0.29685	0.810964	0.210768	1.05549	0.830575	1.10299
	45.2	0.197419	0.243457	0.713514	0.999683	0.903165	0.637707
	45.3	0.928209	0.856611	1.07101	0.123867	0.332863	0.477646
	45.4	0.299574	0.147218	0.0285426	0.363823	0.605908	0.966028
	45.5	0.801113	0.210911	0.818192	0.302118	1.11834	0.75916
	45.6	0.382044	0.367932	0.827608	0.242747	0.283411	0.680916
	45.7	1.0336	0.486112	0.388884	1.18436	0.699923	0.798937
	45.8	0.0534564	0.250989	0.418306	0.856505	1.19125	1.01057
	45.9	1.20848	0.0210378	0.438677	0.230107	0.678144	0.964951
	46	0.580963	0.448935	0.0641516	1.10267	1.06523	1.13128
	46.1	0.704747	0.0429021	0.822332	0.642301	0.21345	0.896671
	46.2	0.846993	0.4372	0.752126	0.403417	1.07948	1.04961
	46.3	0.80433	0.407944	1.0893	1.19967	0.646907	0.29045
	46.4	1.0761	1.11944	0.531811	0.849362	0.177914	0.585515
	46.5	0.0854067	0.703041	0.839866	0.421599	0.889751	0.144264
	46.6	0.971098	0.15349	0.392132	0.495548	1.1632	1.05644
	46.7	0.163301	0.776604	0.18239	0.30129	0.717579	0.132421
	46.8	0.223125	0.068696	0.254652	0.484691	0.752518	0.0554324
	46.9	0.738677	0.735194	0.804567	0.158003	0.329125	0.347064
	47	0.99678	0.473782	1.04447	1.04437	0.607641	0.671072
	47.1	0.948042	0.318708	1.08682	1.03837	0.967575	0.537463
	47.2	1.00074	0.921013	0.143553	0.201206	0.789945	1.16766
	47.3	0.449239	0.0978202	0.691916	0.853026	0.317051	0.891747
	47.4	0.426609	0.715909	1.10374	0.58973	0.524377	0.0064536
	47.5	0.565252	0.381042	0.915261	1.08297	0.245219	0.90788
	47.6	0.292452	0.559567	0.943846	0.68997	1.03289	0.237531
	47.7	0.79746	0.0404977	1.07016	0.621756	0.674633	0.200626
	47.8	0.911876	0.152145	0.964768	0.62034	1.0425	0.424975
	47.9	1.03777	0.0116268	0.249831	0.581725	0.470597	1.18024
	48	0.760435	0.840037	0.508885	0.715512	0.356921	0.0702181
	48.1	1.03106	1.05382	0.838381	0.595572	0.576162	0.927911
	48.2	0.340498	0.128391	0.60625	0.511571	0.661041	0.381752
	48.3	0.806784	0.482478	0.0843306	0.314738	0.909319	0.891638
	48.4	0.660396	0.285427	0.221334	1.0038	0.704727	0.297483
	48.5	0.858235	0.0694764	0.139168	0.784617	0.0401796	0.921811
	48.6	1.2031	0.442775	0.550945	0.159559	0.658175	0.63507
	48.7	0.94838	0.956477	0.182934	0.586288	0.929025	1.16458
	48.8	0.624483	0.0006824	0.865643	0.519745	1.15573	1.09957
	48.9	0.560242	0.151658	0.957084	0.622653	0.702553	0.0724801
	49	0.557	0.750082	0.922295	0.11666	0.318458	0.961265
	49.1	0.694403	0.0020887	1.066	0.894512	0.970273	0.908942
	49.2	0.588504	1.18822	0.256196	0.0215087	0.204479	0.441396
	49.3	0.393062	0.260335	0.0033207	0.611576	0.767859	0.584364
	49.4	0.479878	0.572651	0.79331	0.500913	0.457699	0.907578
	49.5	0.665245	0.797727	0.0948427	0.708677	0.450282	0.626755
	49.6	0.422526	0.493584	0.142746	0.816705	0.254955	0.380925
	49.7	0.977633	0.652667	0.628165	0.553245	0.916276	0.892742
	49.8	0.599896	0.933521	0.633772	0.468891	0.195317	0.217007
	49.9	0.8243	1.15823	0.734121	0.945301	1.17557	0.248828
	50	1.10587	0.842557	0.244024	0.186493	1.04444	0.864805
	50.1	0.731046	1.05923	0.546946	1.04207	0.111326	0.481158
	50.2	1.19985	0.649435	1.18477	0.206314	0.70314	0.0924876
	50.3	1.15489	0.379958	1.05942	0.0058669	0.274573	0.727871
	50.4	0.877897	0.286896	0.797155	1.12962	0.920793	0.663871
	50.5	0.73052	0.590706	0.898204	0.709178	0.635456	0.224297
	50.6	0.0422154	0.742403	0.879163	1.14337	1.09612	0.988021
	50.7	0.634286	0.665488	0.638687	1.00644	0.366646	0.82002
	50.8	0.369322	0.256283	0.174915	0.400974	0.908683	0.0352621
	50.9	0.665216	0.122044	0.403258	0.136347	0.087834	0.247341
	51	0.587608	1.1316	0.203586	0.280235	0.461057	0.0176919
	51.1	0.0489848	0.298683	0.202834	0.815301	0.393396	0.926511
	51.2	0.499842	0.429361	1.12232	0.665516	0.32419	0.683542
	51.3	1.12961	0.766349	0.693174	0.942139	1.01087	0.211181
	51.4	0.046827	0.30723	0.502076	0.424798	0.336694	0.54467
	51.5	0.252786	0.979302	0.519031	0.69827	0.640037	0.880759
	51.6	1.20711	0.255746	0.869688	0.203338	0.256812	0.692132
	51.7	0.555001	1.12716	0.931662	0.846714	0.736576	0.642212
	51.8	0.888277	0.0320887	0.460129	0.780173	0.132804	0.150683
	51.9	0.929695	0.823923	1.09918	1.03759	1.12318	0.317644
	52	0.171074	0.104427	0.168668	1.17649	0.430537	0.978292
	52.1	0.836191	1.06771	0.120239	0.0397581	0.203019	0.413412
	52.2	1.10681	1.05113	0.115069	0.201408	1.17264	0.843472
	52.3	0.718308	1.18086	0.104399	0.903238	0.801057	0.860381
	52.4	0.412296	0.0132098	0.539438	1.08423	0.908468	0.0200189
	52.5	0.164956	0.238653	0.66289	0.572879	0.523192	1.11918
	52.6	0.197118	0.929797	1.10089	0.090302	0.339973	0.672792
	52.7	0.22144	0.657422	0.213962	0.434454	0.18618	0.709924
	52.8	0.29545	0.896886	0.664099	0.203447	1.16559	0.0862499
	52.9	0.228983	0.32184	1.01782	1.19405	0.798704	1.18572
	53	0.0664264	0.696341	0.332348	0.17106	0.442035	0.683428
	53.1	0.553225	0.226466	0.633193	0.453421	1.19842	0.904495
	53.2	0.0832429	0.602567	0.0930941	0.732193	1.0504	1.04012
	53.3	0.567785	1.12302	0.086428	0.230866	0.0193074	1.08195
	53.4	0.0962385	0.153272	0.0158211	0.196436	1.17737	0.990135
	53.5	0.207924	0.225966	0.83561	1.20758	1.10767	0.388995
	53.6	0.459166	1.18543	0.467906	0.612495	1.16316	0.272452
	53.7	0.324571	0.434643	0.898488	0.0431153	0.834319	0.976104
	53.8	1.20391	0.316399	0.563648	0.70339	1.17146	0.0713339
	53.9	0.808974	0.0556135	0.99356	0.582461	0.354874	0.91968
	54	0.248055	0.31655	0.564695	0.950481	0.578779	0.369403
	54.1	1.16181	1.07139	0.9648	0.707845	0.904729	0.475313
	54.2	0.0450408	0.974724	0.609919	0.854011	0.77227	0.452234
	54.3	0.8314	0.443301	1.19947	0.856163	0.14985	0.521437
	54.4	0.256939	0.30116	0.202838	0.797509	0.946108	1.12231
	54.5	0.194158	0.668209	0.3715	0.787669	0.262937	0.460873
	54.6	0.774102	0.457623	0.664994	0.124823	0.711996	1.1843
	54.7	1.0651	0.972206	0.289978	0.862792	0.813534	0.771437
	54.8	0.307269	1.13021	1.02574	0.169086	0.697174	0.558931
	54.9	0.778523	0.17795	0.790386	1.1022	1.00406	1.00296
	55	0.040255	0.182887	0.18507	1.07236	0.910884	0.854332
	55.1	0.113936	1.1401	0.770656	0.723412	0.941262	1.14773
	55.2	0.595908	0.352249	0.172768	0.938019	0.904679	0.704325
	55.3	0.794441	0.960868	0.799811	0.803572	0.257838	0.306822
	55.4	0.508127	0.677839	0.508387	0.575625	0.492603	0.661438
	55.5	0.208604	0.127196	0.698132	0.0871961	0.0785973	0.846888
	55.6	0.55815	0.560993	0.294729	0.366135	0.311635	0.433926
	55.7	1.1847	0.369672	0.556712	0.0402433	0.0708222	0.804026
	55.8	0.554863	1.07894	0.754566	0.12909	0.0275346	0.430706
	55.9	0.444682	0.784855	0.243726	1.11509	1.17742	0.974366
	56	0.62615	0.235424	0.834282	1.18213	0.631677	0.216557
	56.1	0.580779	0.3345	0.723881	0.124402	0.555142	0.583918
	56.2	0.444237	1.13809	1.1239	1.02095	0.693247	0.386155
	56.3	0.553777	0.716939	0.0986151	0.0728801	0.73085	1.20543
	56.4	0.938898	1.02468	0.894839	0.423225	0.323486	1.1103
	56.5	0.345031	0.287965	1.10786	0.995698	0.0083676	0.189872
	56.6	0.626204	0.19202	0.164902	0.791382	1.09538	1.14976
	56.7	1.15942	0.929492	0.148406	1.18714	0.847709	0.762725
	56.8	1.18179	0.994851	0.748669	0.110459	0.64458	0.82188
	56.9	0.337799	0.630085	0.628944	0.673395	0.473748	0.183709
	57	0.213983	0.293275	0.884888	0.780506	0.142828	0.281784
	57.1	1.0708	0.774277	1.11717	0.329035	0.818008	1.13302
	57.2	1.16698	0.407162	0.433147	0.346559	0.20825	1.09903
	57.3	0.67663	0.592282	0.137973	0.891163	0.159238	0.40988
	57.4	0.383965	0.705414	0.930461	0.94551	0.182544	0.678075
	57.5	0.911907	0.325705	1.1499	0.251097	0.353083	0.267161
	57.6	1.02231	0.781514	0.327532	0.794471	0.26096	0.345498
	57.7	0.017697	1.11596	0.759643	0.682303	0.338776	0.005309
	57.8	0.450125	0.372451	0.873003	1.092	0.772078	0.0532421
	57.9	0.228358	0.832813	0.284727	1.13371	0.421769	1.07298
	58	0.537806	0.0788672	1.1478	0.781174	1.19669	0.766201
	58.1	0.346093	0.442871	0.599887	0.542368	0.340091	0.0539399
	58.2	0.949952	0.392406	0.724184	0.413122	0.0690105	0.409542
	58.3	0.320537	0.170326	0.34442	0.652879	1.01141	0.515064
	58.4	0.192181	0.757965	0.192243	0.958741	0.110513	0.157743
	58.5	0.362487	0.908674	0.905434	1.00158	0.207463	0.276472
	58.6	0.373866	0.400963	0.0198385	0.986663	1.19917	0.529367
	58.7	0.139019	0.965897	0.300322	0.295448	0.001564	0.75381
	58.8	0.152422	0.05723	0.347694	0.443941	0.0571439	0.466765
	58.9	1.15439	0.416838	0.0464878	0.31196	0.991767	0.71039
	59	0.200095	0.227929	0.622952	0.0993346	1.10009	1.09343
	59.1	1.18219	0.716451	0.828736	1.12646	0.31137	1.01734
	59.2	0.805789	1.0527	0.295391	0.345873	0.399328	1.06012
	59.3	0.931852	0.239672	0.0551807	0.720144	1.03586	0.317551
	59.4	0.003366	0.34466	0.288017	0.953385	1.01501	0.10374
	59.5	0.31102	0.481975	0.570776	1.16483	0.758022	1.06427
	59.6	0.925271	0.178607	0.359733	0.542163	0.635485	0.184674
	59.7	0.829563	1.02352	0.123659	1.14653	0.293068	0.458412
	59.8	0.596497	0.853174	0.804049	0.395542	1.0103	0.995809
	59.9	0.088207	0.829777	0.107401	0.933537	0.91991	0.806404
	60	0.228865	1.057	0.164605	0.549143	0.700004	0.719825
	60.1	0.884123	0.504309	0.0371218	0.80669	0.350874	0.0857783
	60.2	0.202668	1.00986	0.0633217	1.18213	0.0567614	1.20726
	60.3	0.876725	0.194131	0.924492	0.959623	1.08795	1.14661
	60.4	0.776282	0.0274465	0.252684	1.13988	0.633886	0.768854
	60.5	0.985363	0.27489	0.457373	0.674574	0.89658	0.0514975
	60.6	0.582138	0.148796	0.552273	0.0800236	0.734079	0.19101
	60.7	0.481033	0.562597	0.136748	0.987163	1.1603	0.0469693
	60.8	0.0221603	0.716475	0.918554	0.0098908	0.324962	0.616129
	60.9	0.199798	0.394062	0.161507	0.0339265	1.10017	0.118551
	61	0.773632	0.23973	0.297346	0.181738	1.20266	1.07901
	61.1	0.182239	0.395726	0.615355	0.600196	1.134	0.493236
	61.2	0.783039	0.114264	0.856392	0.785302	0.959008	0.456707
	61.3	0.979192	0.649184	0.497081	0.464341	0.0307808	0.223052
	61.4	0.249752	0.122546	0.267385	0.11931	0.433178	0.886122
	61.5	1.05099	1.16035	0.296671	0.633696	0.644133	0.909663
	61.6	0.615398	0.710534	0.0179853	1.1274	1.18971	0.431238
	61.7	0.584048	0.721486	0.486856	0.0510519	1.15972	0.725616
	61.8	0.0346823	1.05219	0.315978	0.864394	0.704948	0.241494
	61.9	0.0140136	0.972807	1.11642	0.445867	0.768953	0.697019
	62	0.23452	0.984242	0.787395	0.651255	0.421026	0.834503
	62.1	0.754738	0.272465	0.834341	0.219433	0.27928	1.02518
	62.2	1.14878	1.01623	0.524224	0.713179	0.0137048	0.211459
	62.3	0.978513	0.64334	0.375026	0.219434	0.533004	1.11798
	62.4	0.864566	0.937561	0.96482	0.451674	0.617378	1.09135
	62.5	0.0664476	1.10911	1.12408	0.565667	0.834348	0.170797
	62.6	0.3866	0.0385903	0.762784	0.181029	0.0391198	1.04781
	62.7	1.03488	0.100929	0.709203	0.204201	0.880066	0.794863
	62.8	0.832252	0.604147	0.15009	0.429468	0.772253	0.792709
	62.9	0.759446	0.173932	0.313173	0.350024	0.869915	0.533622
	63	0.938187	1.17574	0.670445	0.764289	0.32474	0.420512
	63.1	0.000845	0.479599	0.503982	0.377975	1.0509	0.484786
	63.2	0.265192	1.16348	0.494544	0.759878	0.168909	0.576796
	63.3	0.187955	0.702094	0.0387743	1.13132	0.64302	0.330932
	63.4	0.404457	0.154558	1.19608	0.0244573	0.0097775	0.126793
	63.5	0.783389	0.190392	0.981847	1.20689	0.947402	0.65397
	63.6	0.859847	0.157102	0.593041	0.01771	0.425841	0.980304
	63.7	0.111354	0.819445	0.348329	0.903839	0.563966	1.11599
	63.8	1.02608	1.12818	0.738554	0.479695	0.902407	0.621259
	63.9	0.476552	1.03751	0.198556	0.677779	0.622008	0.160628
	64	0.808047	0.45852	1.14949	1.02772	0.109241	0.579844
	64.1	0.693135	1.08607	0.683825	0.711996	0.462324	0.816687
	64.2	0.187939	0.481964	0.827704	0.471756	0.663383	0.557963
	64.3	1.1481	0.894818	0.151141	0.232985	0.0441513	1.10058
	64.4	0.806209	0.17553	1.14334	0.0363652	0.48442	1.16169
	64.5	1.06113	0.895232	0.467837	0.877295	0.250109	1.18595
	64.6	0.811881	0.0283179	0.652012	1.11928	0.379058	1.09442
	64.7	1.04647	0.158217	0.938398	0.359092	0.995502	0.594071
	64.8	0.168793	0.542569	0.553043	1.12118	0.545906	0.81753
	64.9	0.64919	0.10708	0.5864	0.0930681	0.458674	0.475717
	65	1.06634	0.917314	0.589365	0.528011	0.387474	0.371986
	65.1	0.146154	0.506196	1.14817	0.295442	0.583179	0.230125
	65.2	0.979859	0.387566	1.10711	0.461257	0.674658	0.395948
	65.3	0.0018403	0.389129	0.134976	0.324739	0.673603	1.04768
	65.4	1.18047	0.757408	0.388624	1.10597	0.598622	0.559693
	65.5	0.105975	0.489553	0.1769	0.162507	0.770886	0.554571
	65.6	0.590087	1.06464	0.451875	0.625266	0.570557	0.583904
	65.7	0.587959	1.04496	0.0435675	0.0332977	0.259771	0.808516
	65.8	0.975992	0.292739	0.467965	1.13846	1.14898	0.742317
	65.9	0.625475	0.409422	0.228341	1.09627	0.45665	0.275769
	66	0.115904	1.08711	0.85736	0.508974	1.2054	0.643682
	66.1	0.115728	1.13304	1.10326	0.155426	0.543246	0.669018
	66.2	0.176492	0.283012	0.11424	0.927498	0.005891	0.0175249
	66.3	0.711425	0.308066	1.00087	0.595769	0.933117	0.533622
	66.4	0.0405649	0.500783	0.443694	0.166643	0.225325	0.0048877
	66.5	0.794275	0.35864	1.09697	0.55009	0.787208	0.291408
	66.6	1.18186	0.527822	0.564824	1.18364	0.124232	0.358445
	66.7	1.19431	1.00117	0.314274	0.964293	0.630187	0.960748
	66.8	0.0972752	0.145311	0.70797	0.078689	0.684938	0.465676
	66.9	0.587101	0.3082	0.058749	0.813531	1.03357	0.695854
	67	0.525901	0.383761	0.737387	0.346756	0.96354	0.916168
	67.1	0.988059	0.390508	1.15953	0.299704	1.18681	1.16483
	67.2	0.663833	0.492872	0.408773	0.423422	0.936729	0.242497
	67.3	0.0725923	0.47043	1.15683	0.99785	0.646555	0.291351
	67.4	0.150495	1.20148	0.0404015	0.13008	0.0396015	1.03588
	67.5	1.07391	0.305986	1.07372	0.316018	1.03689	0.484224
	67.6	0.734621	0.707846	1.09782	0.246813	0.298008	0.129966
	67.7	0.954509	0.793867	0.154675	0.699673	0.115503	1.00769
	67.8	0.857436	0.853905	0.13946	0.0144888	0.0349196	0.567612
	67.9	0.544136	0.0306883	1.0444	0.155825	0.129777	1.11882
	68	0.402187	1.13012	0.324272	0.296108	0.546353	0.783421
	68.1	1.03109	0.49502	0.504126	0.782214	1.15405	1.05584
	68.2	0.336462	0.052856	0.16952	0.0889947	0.270867	0.77495
	68.3	0.0270907	0.374477	0.33858	0.0240126	0.493888	0.12587
	68.4	0.307135	0.913237	0.772087	0.789795	0.364667	0.493741
	68.5	0.146259	0.512994	1.10384	0.623788	0.0263917	1.19359
	68.6	1.18255	1.07729	0.143029	0.502015	0.530338	0.40147
	68.7	0.861948	0.775447	0.247865	0.196776	0.200514	0.776931
	68.8	0.164301	0.905489	0.726811	1.15232	0.296753	0.907202
	68.9	0.950103	1.00014	0.331893	0.68646	0.432214	0.0725054
	69	0.803114	0.956744	1.13667	0.358883	0.718249	0.763243
	69.1	0.893309	0.875977	0.644862	0.319278	0.572868	0.381935
	69.2	0.0222931	0.869275	0.368754	1.01941	0.752704	0.910226
	69.3	0.786632	1.16726	0.87783	0.574547	0.454954	0.347858
	69.4	0.123016	1.1023	0.55615	0.899322	0.294797	0.0315377
	69.5	0.395631	0.533151	0.631715	0.158605	0.0610015	0.0085515
	69.6	0.361681	0.162769	0.0201846	0.391537	0.394385	0.290427
	69.7	0.717354	0.967143	0.518684	0.191629	0.689928	0.472688
	69.8	1.09218	0.466775	0.292171	1.0278	0.626795	0.995738
	69.9	0.251429	0.857563	0.261443	0.485223	0.378068	0.581206
	70	0.793213	0.357777	0.600528	0.498911	0.933615	0.151465
	70.1	0.564959	0.759015	0.914325	0.342419	0.483572	0.416042
	70.2	0.130117	1.07205	0.796859	0.650209	0.889488	0.926899
	70.3	0.727817	1.05792	0.103487	0.327417	0.272415	0.47553
	70.4	0.644633	0.910379	0.795038	0.998078	0.0821909	0.907365
	70.5	1.18947	0.547292	1.00735	0.247057	0.521135	0.813874
	70.6	0.10399	0.49412	0.529146	1.00432	0.904492	0.924334
	70.7	1.19169	0.596519	0.920897	1.0959	0.493124	0.674679
	70.8	0.342444	0.924512	0.751339	1.00259	0.0603511	0.734608
	70.9	0.608483	0.644517	0.597759	1.09243	0.494922	0.638128
	71	0.231418	0.763058	0.748945	1.12192	0.0204289	0.593457
	71.1	0.0874548	1.05341	0.150226	1.20268	1.1327	0.242922
	71.2	0.515315	0.394838	0.0600345	0.0222905	0.825787	0.755542
	71.3	1.05607	0.152534	1.10967	0.912816	0.277182	0.924909
	71.4	0.60412	0.53021	0.881571	1.00445	0.735557	1.10786
	71.5	0.82783	0.733961	0.260571	1.0616	0.503311	0.878703
	71.6	0.0241255	1.06111	0.651841	1.06667	0.724662	1.02208
	71.7	1.07297	0.348202	0.720596	0.0463416	1.14806	0.382572
	71.8	1.11478	0.4762	0.738995	0.638082	0.35315	0.016787
	71.9	0.843973	1.1402	0.743973	1.10177	0.87888	0.431439
	72	1.17878	0.215729	0.588813	0.40505	0.44317	0.831313
	72.1	0.782586	1.01695	0.523803	1.15233	0.121092	0.569649
	72.2	0.299642	0.530544	0.940817	0.176221	0.691673	1.04106
	72.3	0.655249	0.922497	0.480674	0.0355208	0.777005	0.540946
	72.4	0.138978	0.011923	1.20408	0.355867	1.204	1.03713
	72.5	0.374667	0.846087	0.908469	0.949347	0.611206	0.610728
	72.6	0.922585	0.2635	0.535282	1.02933	0.702883	0.0075936
	72.7	0.723435	0.258584	1.07414	0.225329	0.872342	0.834667
	72.8	1.17512	0.255057	1.07293	0.410967	0.648501	0.54238
	72.9	1.12304	0.243562	0.153316	0.0414994	0.670722	0.344413
	73	0.579451	0.877126	0.807759	0.429022	0.896358	0.0055745
	73.1	0.615092	0.10904	1.12572	0.20924	0.303272	0.93101
	73.2	0.268728	0.740346	0.566652	0.368807	0.544954	0.0601963
	73.3	1.03717	0.247962	0.372098	0.118159	1.05083	1.1451
	73.4	0.763007	0.321089	0.31597	1.13448	0.876855	0.956765
	73.5	0.255619	0.908876	0.851746	0.0035981	0.888164	0.0522155
	73.6	0.99458	0.741233	0.471458	1.12638	0.200436	0.451605
	73.7	1.12459	1.17001	1.07098	0.589122	0.944119	0.699403
	73.8	0.605358	0.844596	0.181459	0.160468	0.423689	0.397501
	73.9	0.937142	0.831549	1.15472	1.00516	0.68156	0.811032
	74	0.827453	0.3954	0.24643	1.05572	0.0624599	1.11722
	74.1	0.173618	0.367621	1.10299	0.634996	0.12844	0.129019
	74.2	0.832296	0.869596	0.30585	0.642913	1.08681	0.0528094
	74.3	0.360101	0.527583	0.0617765	0.433814	0.984842	0.638005
	74.4	0.143072	0.238966	1.02827	1.06979	1.15659	0.249424
	74.5	1.19906	0.034331	1.13103	0.640441	0.18332	0.954105
	74.6	0.61093	1.12026	0.546301	0.0496902	0.198141	0.0602118
	74.7	1.05162	0.751172	0.377289	0.707312	0.26347	1.08188
	74.8	0.62775	0.448681	0.207894	0.508406	1.09754	1.19694
	74.9	0.358033	0.220596	0.953079	0.0288207	1.11323	0.305918
	75	0.256999	0.459991	0.56866	0.241141	0.387979	0.651544
	75.1	1.06716	1.09504	0.754751	0.0958084	1.04414	0.358198
	75.2	1.13501	0.228364	0.879615	0.271447	1.00274	0.0544631
	75.3	0.0301648	1.129	1.16834	0.149909	0.558495	0.650539
	75.4	0.93386	0.599124	0.0771767	0.382527	1.09937	0.813348
	75.5	0.341583	0.197886	0.25751	0.827591	1.01793	0.845438
	75.6	0.771025	0.636144	0.235861	0.353053	0.878504	0.0561065
	75.7	1.09979	1.1551	0.114189	1.02942	0.649767	0.177544
	75.8	1.18475	0.542922	1.09729	0.95025	0.822043	0.794674
	75.9	0.840068	0.190116	1.08969	0.789241	0.594384	0.356249
	76	0.513261	0.592357	0.819586	0.375055	0.354687	0.166949
	76.1	1.06621	0.199041	0.849424	1.03589	0.46911	0.0690728
	76.2	0.0810297	0.131106	0.445248	0.628892	0.467337	0.884275
	76.3	0.0389267	0.0435895	0.313001	1.17063	1.10912	1.11115
	76.4	1.05355	0.65381	1.13598	0.0659305	1.14301	0.675734
	76.5	0.639295	0.366567	0.388585	0.306966	1.16889	0.292944
	76.6	0.764569	0.168259	0.0872544	0.108962	0.827205	0.425017
	76.7	0.598471	1.12321	0.586163	0.80434	1.16147	1.16977
	76.8	0.166602	0.351906	1.15183	0.0774406	0.539176	0.0544575
	76.9	0.227749	0.707215	1.12742	0.848124	0.462556	1.04001
	77	0.427681	0.191004	0.288943	0.937537	0.791303	0.645328
	77.1	1.08063	1.01696	0.0712037	0.146782	0.0688807	1.04413
	77.2	0.29883	0.315922	0.270407	0.064255	1.02319	0.205302
	77.3	1.16009	0.783033	0.370457	0.661412	0.660576	1.15309
	77.4	0.295795	0.811242	0.221204	0.673415	0.450902	0.454596
	77.5	0.95326	0.946274	0.132025	0.861431	0.377981	0.461107
	77.6	0.948574	0.764184	0.45756	0.303001	0.884953	0.425934
	77.7	0.65785	0.771602	1.06378	0.230527	0.950153	1.20029
	77.8	1.10157	0.233789	0.267839	0.833911	1.16942	0.190895
	77.9	0.552671	0.1935	0.719137	0.301627	0.309683	0.276068
	78	0.689001	1.1878	0.444184	0.691375	0.55336	0.642898
	78.1	0.0911495	1.1311	0.896971	1.02575	0.270044	0.770131
	78.2	0.494089	0.858274	0.554951	0.0041656	0.273525	0.871125
	78.3	0.107326	0.557232	0.850608	0.927545	0.357327	0.625005
	78.4	1.12408	0.424121	0.732133	1.16852	1.12439	1.18093
	78.5	0.833125	0.330523	0.651279	0.442525	1.20104	0.275707
	78.6	0.101095	0.375683	0.655675	0.129773	0.638565	0.066253
	78.7	0.653628	0.311029	0.498377	0.85242	0.274199	0.565579
	78.8	0.0805167	0.952678	1.03633	0.546412	0.74847	0.684414
	78.9	0.286056	0.190192	0.929119	0.303302	0.441685	1.15959
	79	0.193062	0.500036	1.12742	0.36486	0.594082	1.01032
	79.1	0.853465	0.518023	0.485995	0.800949	0.437875	1.14902
	79.2	0.681026	1.10704	1.06844	0.588632	0.311261	1.12862
	79.3	0.419628	0.769263	0.331311	0.640657	0.357252	0.737424
	79.4	0.530638	0.786038	0.0250335	0.372884	0.648066	0.968494
	79.5	0.560433	0.647161	0.615338	1.10633	0.251582	0.845298
	79.6	0.840878	0.629218	0.54479	1.02189	0.474722	0.664776
	79.7	1.05575	0.333691	1.1305	0.806234	0.125607	0.916727
	79.8	0.537341	0.190785	1.05094	1.05909	0.432791	0.463829
	79.9	0.756405	0.0888678	1.1816	0.346751	0.9416	0.726474
	80	0.353424	1.05984	0.523695	0.33002	0.111878	1.17424
	80.1	0.398368	0.317659	0.824248	0.755127	0.435476	0.974134
	80.2	0.923624	0.481586	0.137366	0.479424	0.546093	0.85092
	80.3	0.551734	0.172982	0.293019	0.449602	0.262761	0.353955
	80.4	0.456635	0.145898	0.569946	0.407394	0.317819	0.591688
	80.5	1.15186	1.00169	0.0586533	0.852154	0.0419147	0.215534
	80.6	0.0464113	1.09311	0.612606	0.73321	1.1352	0.0582643
	80.7	0.181713	0.945083	0.752865	1.02623	0.658354	0.734189
	80.8	1.13534	0.052632	0.230516	0.0836726	1.01031	0.428711
	80.9	1.00652	0.461162	0.0549979	0.118108	0.624749	1.15961
	81	0.94191	1.05747	0.143439	0.8979	0.612772	0.567983
	81.1	0.686895	0.729978	0.803745	0.217564	1.03819	0.295393
	81.2	0.476634	0.440127	1.13989	1.20632	0.469123	0.316462
	81.3	0.883868	0.148861	0.188114	0.352211	0.774038	0.695168
	81.4	0.516813	0.686236	0.594863	0.0814161	0.164811	0.59551
	81.5	0.829014	0.749295	0.929557	0.3434	0.740358	0.695633
	81.6	0.299011	1.2064	0.212362	0.325292	0.875312	0.0285731
	81.7	0.300226	0.992128	0.508195	0.223595	0.263399	0.415959
	81.8	0.841204	1.01391	0.458661	1.03407	0.509858	0.969493
	81.9	0.583588	0.244175	1.06769	0.305005	1.17242	0.342557
	82	1.10036	0.718579	0.320242	0.816782	1.06498	1.14135
	82.1	0.808637	0.813208	1.07922	1.02978	0.425481	0.130063
	82.2	1.14616	0.352831	0.900234	0.848753	0.15286	0.91892
	82.3	0.24346	0.994613	0.967642	0.713387	1.04679	0.30892
	82.4	0.126116	0.20361	0.0029026	0.37536	0.81923	0.49761
	82.5	0.0477654	0.790375	0.717706	0.771519	0.428848	0.795366
	82.6	0.520183	0.486766	0.910425	0.140297	1.13477	1.16645
	82.7	0.0165939	0.388633	0.786084	0.0989594	0.396119	0.534288
	82.8	0.573192	0.335835	0.810416	0.383678	0.80938	1.09109
	82.9	0.648932	0.686278	0.635742	0.956241	0.0562086	0.167803
	83	1.08222	0.0323581	1.19311	1.11429	0.343278	0.376159
	83.1	1.00776	0.085645	0.416475	1.12274	0.346678	0.279063
	83.2	0.443257	0.141711	0.48277	0.315409	0.359483	1.11115
	83.3	0.285348	0.0151313	1.19524	0.0490872	0.231812	0.0809486
	83.4	1.03578	0.0497735	0.628691	1.1808	0.517	1.20521
	83.5	0.376029	0.769871	0.565365	0.739082	1.00823	0.137713
	83.6	1.00819	0.683347	0.96379	0.905568	0.853263	0.305117
	83.7	0.362133	0.354801	0.849848	0.678901	0.561027	0.90729
	83.8	0.880452	0.0982209	0.279857	0.148213	0.289795	0.829901
	83.9	0.847198	0.166939	0.40178	0.339843	1.01958	1.03051
	84	0.171097	0.770446	0.276967	0.0081877	0.587009	0.890478
	84.1	1.14807	0.145502	0.0436926	0.0904667	0.783638	0.259309
	84.2	1.1073	0.676865	0.951479	0.738781	0.741098	0.630591
	84.3	0.833949	0.811902	0.269759	0.852896	0.23993	0.109161
	84.4	0.858596	1.01006	0.885919	1.03874	0.967755	0.860455
	84.5	0.829314	0.859402	1.15646	1.17676	0.0651204	1.09455
	84.6	0.946928	0.959514	1.05998	0.988636	0.81673	0.188225
	84.7	0.448998	0.82792	0.574451	0.971376	0.250532	1.16141
	84.8	0.0850726	0.968421	0.298317	0.488237	0.87782	9.43e-05
	84.9	0.436218	1.18056	1.19292	1.15873	0.397961	1.04079
	85	0.596013	0.261266	0.869124	1.19977	0.961677	0.444009
	85.1	0.79496	1.07747	1.04675	0.29246	1.11088	0.357636
	85.2	0.0775871	0.914045	1.12536	0.211755	0.670867	0.0486742
	85.3	0.541037	0.116774	0.71421	0.0789362	0.382965	0.268301
	85.4	0.733686	0.55844	0.336516	0.19502	1.14283	0.0830513
	85.5	0.0036191	0.763969	0.846615	0.874294	0.49111	0.107719
	85.6	0.153294	0.331152	0.920428	0.640087	0.728169	0.145125
	85.7	0.892491	1.00917	0.818016	1.2025	0.405653	0.375209
	85.8	0.125093	0.706438	0.648991	0.814458	0.468631	0.534738
	85.9	0.830758	0.779453	0.204101	0.671988	0.636317	0.205706
	86	0.432317	1.12947	0.15596	0.919313	0.743428	0.624646
	86.1	0.151521	0.548058	0.111007	1.06923	0.998875	0.697717
	86.2	0.330081	1.05733	1.17677	0.0317169	1.13106	1.14761
	86.3	0.111307	0.51549	0.120211	0.260841	0.362994	0.247975
	86.4	0.324339	0.0648018	0.843341	0.304335	0.507073	0.454967
	86.5	1.13001	0.262908	0.235608	0.688745	0.295984	0.648715
	86.6	0.689322	1.07967	0.726071	0.0383384	0.117566	0.791703
	86.7	0.445734	0.0154444	1.05016	0.550887	0.685299	0.385538
	86.8	0.446479	0.0972442	0.643178	1.01058	0.0802178	0.0242692
	86.9	0.476837	1.13103	0.529428	0.589663	0.992066	0.0767452
	87	0.176925	0.0365761	0.393262	0.516732	0.193996	0.259943
	87.1	1.0207	0.204449	0.0606648	0.999849	0.57654	0.57283
	87.2	0.161316	0.126849	0.221956	1.06054	0.860799	1.18631
	87.3	0.317761	0.454894	0.608327	0.0075978	0.479172	0.795748
	87.4	1.11375	0.849535	0.51211	0.561999	0.636724	0.518264
	87.5	0.675846	0.587817	1.08828	0.844919	0.842317	0.0918621
	87.6	0.556598	0.556433	0.876107	0.51088	0.468556	1.09816
	87.7	0.252805	0.34225	1.20053	0.408391	0.482152	1.01733
	87.8	0.425817	0.999447	0.293075	0.229097	0.417315	0.371433
	87.9	0.402679	0.685645	0.46823	0.211894	0.0396402	0.70644
	88	0.0078071	0.0046941	0.399714	1.06654	0.624375	0.23908
	88.1	0.226853	0.992722	0.685163	0.942503	1.11652	0.303372
	88.2	0.741732	0.417778	1.07825	0.162894	0.309015	0.589905
	88.3	0.406224	0.50321	1.13771	0.0210529	0.0940898	0.485822
	88.4	0.148994	0.705383	0.701536	0.519875	0.486886	0.395942
	88.5	1.13773	0.743843	0.0345778	0.584238	0.571791	0.323597
	88.6	1.20522	0.840714	0.0608123	0.998994	0.557339	1.08542
	88.7	0.72172	0.391492	0.201202	0.3547	0.244516	0.542584
	88.8	0.324238	0.353879	0.478399	0.0620958	0.626904	0.28745
	88.9	0.296146	0.269644	0.975213	0.450424	0.208652	1.01915
	89	0.0656859	0.190447	1.17886	0.37504	0.732649	0.160874
	89.1	0.0603166	0.634696	0.653192	0.693779	0.162103	0.752691
	89.2	0.359354	0.473909	0.278408	1.17276	0.0519272	1.20732
	89.3	0.414021	0.300216	1.14836	0.198252	0.098731	1.09771
	89.4	0.990091	0.701855	0.0874098	1.04495	1.12804	1.06646
	89.5	0.12678	1.04759	0.747987	0.0420683	0.983556	0.476517
	89.6	1.0943	0.548655	0.390929	0.132326	1.0221	1.05831
	89.7	0.724239	0.616028	0.796057	0.885654	0.69207	0.185719
	89.8	0.954817	0.701895	0.55273	0.0115306	0.178835	0.130569
	89.9	0.0955758	0.855491	1.0605	0.41136	0.414931	0.838767
	90	0.954713	1.01657	0.70104	0.843028	0.913521	1.10479
	90.1	0.833186	0.439452	1.15812	0.153305	0.671077	0.776219
	90.2	1.14881	0.965944	0.565585	0.685334	0.935845	0.213369
	90.3	0.905927	0.343357	0.711338	0.325627	0.426715	0.286303
	90.4	1.05932	0.593749	0.0903046	1.11559	0.000101	0.149195
	90.5	0.719399	0.985019	0.647772	0.195113	0.947081	0.647856
	90.6	0.917319	0.441901	0.504112	0.134023	0.0656863	0.556551
	90.7	0.543554	0.427353	0.155213	0.598352	1.06497	0.990364
	90.8	0.422354	0.890302	0.133182	0.236038	0.274403	0.216613
	90.9	1.13184	0.814219	0.935925	0.351378	0.213815	0.437306
	91	0.726805	1.15041	0.777955	0.185517	0.364732	0.667606
	91.1	0.713184	0.0870676	0.228998	0.797262	0.451866	0.292741
	91.2	1.14583	0.622122	0.608255	0.736667	0.704125	1.12355
	91.3	0.488792	1.14803	1.16649	0.137072	0.128449	0.612166
	91.4	0.056223	0.605883	0.68634	0.13886	1.0823	0.603892
	91.5	1.07226	0.653519	0.0889183	1.13675	0.18884	0.214289
	91.6	0.0711279	0.152626	0.184247	0.144969	0.27855	0.2491
	91.7	0.427416	1.13926	0.639021	0.0278226	1.02609	0.779932
	91.8	0.278842	0.505457	0.826024	0.70788	1.1785	0.933484
	91.9	0.572331	1.16494	1.10455	1.03121	1.06811	0.331371
	92	0.661178	0.858939	0.0390789	0.712027	1.02464	0.82501
	92.1	0.207911	0.769217	0.589759	0.815727	0.111717	0.263323
	92.2	0.185913	0.795455	0.499117	0.27428	0.615836	0.8965
	92.3	1.19682	0.924942	1.1105	1.00994	0.585808	0.204904
	92.4	0.795577	0.34166	0.546791	1.00176	0.0924946	0.0779006
	92.5	1.11432	0.0119214	0.791501	0.242824	0.715399	0.35535
	92.6	1.12285	0.866539	0.380453	0.0882583	0.649842	0.988285
	92.7	1.01903	0.285496	0.216834	0.256817	0.83406	0.535833
	92.8	1.0008	0.455913	0.0184262	0.382915	0.0371608	0.889738
	92.9	0.949385	1.12089	0.340422	1.03925	0.235698	0.494352
	93	0.129392	0.70831	1.13042	0.320864	0.384041	0.728761
	93.1	0.689594	0.650282	0.887786	0.393182	0.950917	0.16609
	93.2	1.08744	0.894098	1.13631	0.835789	0.794026	0.407036
	93.3	0.908688	0.396094	0.523952	0.563062	0.370553	0.261913
	93.4	1.05986	1.05679	1.14214	0.0379574	1.18143	0.362849
	93.5	0.359297	0.87543	0.829799	0.418961	0.624366	0.231861
	93.6	0.389346	0.179293	0.0722846	1.03602	0.287883	1.08111
	93.7	0.787732	0.312739	1.12754	0.0910199	0.460865	0.496355
	93.8	0.680602	1.09625	0.960043	0.551057	0.551721	0.214443
	93.9	0.0904496	0.0525404	0.265096	0.8838	0.626694	0.510275
	94	0.884727	0.718865	0.736145	1.13798	0.687886	0.20157
	94.1	0.0701827	1.07605	0.0886529	1.14619	0.81492	0.436613
	94.2	0.10608	0.510432	1.0194	0.325271	0.828244	0.437937
	94.3	0.0752078	0.389029	0.457056	0.914563	0.756108	0.20263
	94.4	0.711853	0.616888	0.287629	1.1706	0.691982	0.390324
	94.5	0.718875	0.241436	0.552979	0.236431	1.18668	0.228985
	94.6	0.732938	1.17138	0.779761	1.08496	0.337033	1.18902
	94.7	0.537222	0.80141	1.1783	0.401713	0.121965	0.115918
	94.8	0.119625	0.439677	0.333016	0.711291	0.366996	0.749471
	94.9	0.186722	0.463532	0.45874	0.748307	0.832824	1.11437
	95	1.04441	0.575017	0.132934	1.0543	1.15816	0.573652
	95.1	0.100499	0.817069	0.130608	1.04361	0.226137	0.207766
	95.2	0.856691	0.308648	0.308655	0.61189	0.559656	0.519389
	95.3	0.652039	0.696288	0.58033	0.394166	0.842122	1.09023
	95.4	1.01286	1.15172	0.338362	0.835302	0.735125	0.407001
	95.5	1.01596	0.668591	0.743078	0.415757	1.1594	0.406915
	95.6	0.0145008	0.59767	1.05325	0.780372	0.0252621	0.301764
	95.7	0.576512	0.71791	0.792889	1.06478	0.399513	1.15884
	95.8	1.12202	0.0333756	1.09078	1.15687	0.309266	0.691284
	95.9	0.496507	0.507999	1.14892	1.18432	0.534432	0.091616
	96	0.752788	0.373748	1.02954	1.0671	0.157764	0.816859
	96.1	1.0181	1.05497	0.594628	0.704106	0.769082	0.696862
	96.2	0.264464	0.833966	0.874417	0.535394	0.981268	0.806526
	96.3	0.7132	0.658716	0.694601	0.989374	0.703152	0.150558
	96.4	0.713128	0.964239	0.584905	0.763038	0.601798	0.853956
	96.5	0.999271	0.672346	0.735162	1.11168	1.17136	1.09627
	96.6	0.946304	0.613393	1.02614	0.784992	0.638357	1.10103
	96.7	0.908336	0.823384	0.152818	1.20345	0.257663	0.489693
	96.8	1.1617	0.290632	0.173026	0.729546	0.122217	1.00424
	96.9	0.741294	0.120612	0.860626	0.266881	1.02164	0.212442
	97	0.288431	0.580223	0.480263	0.271518	0.155341	0.989989
	97.1	0.294389	0.029728	0.0951402	1.02012	0.0927839	0.29393
	97.2	0.930572	0.604459	0.229052	1.06426	1.01397	0.684564
	97.3	0.0379381	0.758128	0.837086	1.16358	0.588977	0.143333
	97.4	1.145	0.416475	0.494547	0.547467	0.194289	0.623177
	97.5	0.285193	0.662401	0.525318	0.982639	0.749377	0.745943
	97.6	0.355772	1.20255	0.900621	0.0587287	0.864242	0.133576
	97.7	0.411043	0.395141	1.09516	0.184485	0.582683	1.02123
	97.8	0.456899	0.174051	0.661426	1.07128	0.101954	0.452814
	97.9	0.106297	0.839191	0.455209	0.963656	0.578705	0.605128
	98	0.835492	0.915902	1.01252	0.890427	1.15022	0.526638
	98.1	0.289376	0.287837	0.330711	0.181623	0.633909	0.264645
	98.2	0.88755	0.362024	0.552218	0.753262	0.0362222	0.878737
	98.3	0.26117	1.13241	1.13854	0.196037	0.635439	0.204841
	98.4	0.354978	0.36881	0.321782	1.06547	1.07736	0.0002607
	98.5	1.0123	0.467329	0.963329	0.293527	0.151272	0.713333
	98.6	0.688741	0.463457	0.928726	0.406394	0.0056998	1.13128
	98.7	0.179765	0.934821	0.201915	0.455203	1.13879	1.15425
	98.8	0.227343	0.582493	0.118243	0.379442	0.42856	0.529953
	98.9	0.105248	1.06207	1.17044	0.824313	0.656472	0.941637
	99	0.256629	0.372016	0.560316	0.543322	0.595219	0.802296
	99.1	1.15111	0.516184	0.619735	0.271683	0.426992	0.946862
	99.2	1.17167	0.232618	0.814589	0.0249539	0.841752	0.396003
	99.3	0.902625	0.248069	0.439178	0.979651	1.17173	0.612108
	99.4	0.772821	0.736532	0.547421	0.864713	0.902433	0.760184
	99.5	1.04928	0.728493	0.660039	0.688273	0.864236	0.0901379
	99.6	0.359189	0.616228	0.449081	0.227572	0.159631	0.156432
	99.7	0.148739	0.877445	1.1301	0.202282	0.685993	0.418392
	99.8	0.0993695	1.12479	1.01783	0.429742	0.407434	0.557836
	99.9	0.947766	0.487229	0.544833	0.211642	0.0938943	1.06097
	100	0.703297	1.04792	1.00518	0.307289	0.440214	0.791461
	100.1	0.641397	0.0871725	0.86018	0.829103	0.269023	0.0360954
	100.2	0.497571	0.399971	3.21e-05	0.414426	0.907341	0.988914
	100.3	1.12875	1.18516	0.90723	0.297922	1.19252	0.261054
	100.4	0.13734	0.37068	0.345443	0.84863	0.227124	0.856714
	100.5	0.180082	0.232882	1.03121	0.990558	0.0871589	0.197534
	100.6	0.568205	0.862127	0.96455	0.609383	1.17373	0.786666
	100.7	0.366125	0.795391	0.314523	0.736574	0.0140081	0.936509
	100.8	0.742099	0.0014604	0.743003	1.14156	0.122272	0.438952
	100.9	0.411477	0.328738	0.280202	1.0271	0.621704	1.03076
	101	1.06282	1.15632	0.0078291	0.541701	0.347398	0.643718
	101.1	0.823745	0.544051	0.632197	0.519016	0.371278	0.229143
	101.2	1.00444	0.114863	0.847589	0.249314	1.17417	0.395234
	101.3	0.462941	0.0267071	0.432223	0.614658	1.1583	1.02908
	101.4	0.596249	1.18506	0.408456	0.130831	0.147929	1.11924
	101.5	0.0711326	0.805251	0.820791	0.588003	0.400733	0.37304
	101.6	0.401772	0.0952613	0.299328	1.10674	0.768246	1.01245
	101.7	0.331178	0.583438	1.0493	0.490335	0.805332	0.337828
	101.8	1.09744	0.241948	0.0016571	1.15596	0.0668277	0.970301
	101.9	0.822384	1.15749	0.496134	0.877519	0.0270675	0.514553
	102	0.169102	0.677145	0.479723	0.482568	0.816359	0.216147
	102.1	0.810326	0.017115	0.563455	0.316862	0.901517	0.706093
	102.2	0.656581	0.109008	0.458175	0.70558	0.630382	0.182425
	102.3	1.15793	0.904182	0.118031	0.710247	0.875038	0.525272
	102.4	0.523209	0.905713	0.340078	0.229002	0.198987	0.48218
	102.5	0.24877	0.0413775	0.408833	0.861029	0.440198	0.749634
	102.6	0.591702	0.646041	0.445999	0.481851	0.679019	0.217693
	102.7	0.828611	0.258128	1.01363	0.0854831	0.332952	0.150675
	102.8	0.131898	0.106379	0.415611	0.548021	0.280786	0.51116
	102.9	0.0688259	0.193497	0.417061	0.27766	1.0324	0.637653
	103	0.498616	0.596083	1.17141	0.372693	1.04292	0.761556
	103.1	1.1006	0.540488	1.14098	0.909077	0.593699	0.801137
	103.2	0.226421	0.675967	0.650716	0.116616	0.397518	0.979408
	103.3	0.246801	0.352857	0.886095	0.772931	0.769267	0.533509
	103.4	0.717266	0.0161147	0.588156	0.976557	0.845224	1.04018
	103.5	0.405351	0.272446	1.03438	0.489688	0.716116	0.111093
	103.6	0.908415	0.380006	0.0587329	0.557729	0.781189	1.08714
	103.7	0.564758	0.637107	1.13431	0.940374	0.915743	0.37596
	103.8	0.461713	0.580096	0.302221	0.719454	0.948664	0.663476
	103.9	0.971785	0.927935	0.704622	0.644816	0.297839	0.449915
	104	0.166566	0.890819	0.181838	0.44306	0.763241	0.519799
	104.1	0.148362	1.13221	0.759728	0.986279	0.750654	0.268422
	104.2	0.486186	0.567528	1.15921	1.10651	0.440479	0.148147
	104.3	0.030712	0.125281	0.841924	0.220234	0.601194	0.615012
	104.4	0.781318	0.979316	0.0566613	0.247581	0.715825	0.992483
	104.5	1.14134	0.0146549	0.559366	0.573867	1.02709	1.11234
	104.6	0.683245	0.99183	1.19464	0.283956	0.0080013	0.980074
	104.7	1.11841	0.981585	0.348348	0.897373	0.662381	0.4865
	104.8	0.349226	0.530723	0.13913	1.01305	0.921214	0.0111226
	104.9	0.965261	1.117	0.334526	1.19473	0.240658	1.03535
	105	0.929755	0.395446	0.743273	0.41041	0.307142	0.965012
	105.1	0.164864	0.338379	0.914379	1.02104	1.13367	0.337073
	105.2	0.460166	0.619296	1.0449	0.503596	0.816717	0.876615
	105.3	0.489192	0.415442	0.327419	0.768229	0.394969	0.909199
	105.4	0.417363	1.10565	0.888615	1.00813	0.386199	0.261255
	105.5	1.18039	0.862646	0.527838	0.866442	1.00435	0.238504
	105.6	0.456787	1.04765	0.0037614	0.408566	0.584363	0.827267
	105.7	0.144563	1.18118	0.625576	0.862432	0.516749	0.0032716
	105.8	0.169526	0.240329	0.396431	1.12006	1.12971	0.993256
	105.9	1.05334	0.432659	1.1713	1.19511	0.850615	0.674934
	106	1.17747	0.806118	0.818984	0.215829	0.719039	0.354031
	106.1	0.112742	0.200863	0.602369	0.576635	0.0410358	0.063553
	106.2	0.870332	0.550773	0.476288	0.527025	0.868593	0.858599
	106.3	0.255236	0.0605162	0.192577	0.134623	0.942648	0.190149
	106.4	0.459748	0.98986	0.163865	1.0062	0.0254135	0.325955
	106.5	0.687418	0.783795	0.241624	0.752416	0.439654	0.83901
	106.6	0.728593	0.408434	0.0397318	0.570246	0.88514	0.301399
	106.7	0.499103	0.534242	0.428744	1.14506	0.190846	0.724232
	106.8	0.738572	1.06189	0.762172	0.45835	0.0680219	1.05539
	106.9	0.753712	0.90113	1.14743	0.431972	1.12456	0.0507886
	107	0.436039	0.206929	0.632781	0.95671	0.385308	0.228157
	107.1	0.0494677	0.432945	0.316192	0.98723	0.171515	0.42337
	107.2	0.70333	0.249926	0.240319	0.378549	0.300432	0.288205
	107.3	1.07272	0.897273	0.0656929	0.22568	0.111591	1.1404
	107.4	0.412093	0.38961	1.07069	0.060336	0.499777	0.981768
	107.5	0.109026	0.875754	0.557826	0.0436315	1.09503	0.587374
	107.6	0.385259	0.320721	0.443182	0.648443	0.455621	0.0466313
	107.7	0.859903	1.13658	0.731081	0.150579	1.16058	1.17947
	107.8	0.967928	1.03736	0.452109	0.125854	0.184702	0.731688
	107.9	1.17073	1.11072	0.0090745	1.19902	0.809321	0.990494
	108	0.074981	1.17705	0.452545	1.08251	0.256044	0.103185
	108.1	0.457038	0.420823	0.372743	0.158728	0.498854	0.770539
	108.2	0.0601585	0.502537	0.605239	0.997373	1.06182	1.02508
	108.3	0.458266	0.125075	0.258224	0.145832	1.06737	1.11085
	108.4	0.156851	0.060488	0.182239	0.377834	0.95666	1.07244
	108.5	0.2021	1.16602	0.11746	0.565062	1.01735	1.08229
	108.6	0.192222	0.0049018	0.79028	0.51259	0.287667	0.886816
	108.7	1.1263	0.569644	0.906807	1.0419	0.691509	0.260613
	108.8	1.15039	0.280528	0.865671	1.02645	0.949317	0.860447
	108.9	0.0649378	0.126814	0.0749091	0.172031	0.313507	0.70535
	109	0.690837	0.517809	0.882194	1.03334	1.00565	1.05694
	109.1	0.793755	0.207876	0.904504	1.11022	0.634647	1.08852
	109.2	0.377702	1.13851	0.497843	0.581507	0.467684	0.643448
	109.3	0.676904	0.100146	0.166219	1.03129	0.78372	1.14354
	109.4	1.08698	0.0651385	1.03387	0.222623	0.641669	0.816505
	109.5	0.749265	0.619402	0.286758	0.261308	0.0014644	1.03487
	109.6	0.0633938	0.761592	0.0082006	0.583517	0.801892	0.0808478
	109.7	1.17507	0.566543	0.64412	0.881128	0.184287	0.20064
	109.8	0.285764	0.809503	0.568903	1.10332	0.910827	0.966439
	109.9	0.571492	0.522417	0.252356	0.562871	0.545297	0.457658
	110	0.366359	0.731875	0.200668	0.288592	0.583307	0.243554
	110.1	0.780253	0.910316	0.132289	0.0913397	0.125451	0.588592
	110.2	0.169993	0.723576	1.07606	0.384612	0.436667	0.628597
	110.3	0.846124	0.446916	0.473056	0.0014292	0.131778	0.0529637
	110.4	0.836869	0.774253	0.885724	0.53575	0.183834	0.63693
	110.5	0.0492874	0.556554	0.840812	0.566306	1.18059	0.43047
	110.6	0.184959	1.07723	1.00739	0.107011	0.22712	0.601379
	110.7	1.05741	1.01087	0.794912	0.613132	0.808247	0.338367
	110.8	0.801927	1.13922	1.0474	1.04771	1.18575	0.683738
	110.9	0.0585047	0.348608	0.551745	1.0994	0.0785562	1.00087
	111	0.539186	0.627954	1.09964	1.19207	0.328159	0.199356
	111.1	0.914982	1.11712	0.238654	1.10749	1.08645	0.0081678
	111.2	0.762659	0.516069	0.123949	1.02585	0.169582	1.03428
	111.3	0.155373	0.215473	1.12878	1.01071	0.989621	0.625965
	111.4	0.27697	0.503207	0.129166	0.369104	0.815306	0.742612
	111.5	1.13628	0.945719	0.357027	0.0171592	0.511704	0.0798452
	111.6	0.38148	1.14283	0.694334	0.20117	0.0305662	1.20484
	111.7	1.20602	0.31563	0.948622	0.973237	0.644049	0.450635
	111.8	1.07826	0.655454	0.565513	1.03236	0.759955	0.0749828
	111.9	1.06079	0.751517	0.350488	0.990289	0.484325	0.431286
	112	1.01474	0.362708	0.188178	0.767898	0.403994	0.268678
	112.1	0.149468	1.17273	0.715749	0.111721	1.18902	0.306043
	112.2	0.538822	0.297356	0.963978	1.04079	0.815007	0.9238
	112.3	0.696881	0.510929	0.576194	0.847547	0.933967	1.09272
	112.4	0.675197	0.78687	0.194631	0.930872	0.362459	0.837213
	112.5	0.107271	0.894905	0.301478	0.509005	0.555316	1.19824
	112.6	1.08956	0.140202	0.0431947	0.254763	1.01174	0.0241657
	112.7	0.667963	0.417583	0.574139	0.238873	1.19634	0.873969
	112.8	0.974546	0.862664	0.0744557	1.01448	0.959303	1.13701
	112.9	0.602019	0.482125	0.19408	0.308103	0.77605	0.383727
	113	0.448151	0.101572	0.870353	0.0192401	1.07736	0.169013
	113.1	1.18962	0.490505	0.303409	0.891514	0.202702	0.411928
	113.2	0.801164	0.935245	0.348686	0.381545	1.08328	0.5346
	113.3	0.962133	0.474054	0.55499	0.772196	0.440878	0.303561
	113.4	0.793112	0.612553	0.660753	1.16915	0.396666	0.0245491
	113.5	0.522909	1.06216	0.168972	0.0131592	0.0827851	0.0607092
	113.6	0.547661	0.604254	0.355906	0.152527	0.476855	0.459612
	113.7	0.145045	0.493275	1.05158	0.218116	0.120075	0.311368
	113.8	0.664846	1.04249	0.806851	0.52838	0.122371	1.1357
	113.9	0.707171	0.814928	0.349036	0.349401	0.994346	0.921907
	114	0.116774	0.6862	0.926295	0.407992	1.06974	0.39515
	114.1	0.822983	1.19644	0.107005	0.385572	0.585644	0.63083
	114.2	0.351461	0.813929	0.208553	0.318799	0.310237	0.548629
	114.3	0.332112	0.216333	0.271269	0.481813	0.38079	0.396376
	114.4	0.96733	1.12439	0.866168	0.956158	1.00843	0.0433551
	114.5	0.913032	0.183631	0.0839002	1.16585	1.1322	0.0738634
	114.6	0.754447	0.563574	0.552582	0.33379	1.07813	0.846047
	114.7	0.497593	0.197337	1.10723	0.743572	0.961681	0.850124
	114.8	0.502874	0.816779	0.140209	0.684995	1.15985	0.693543
	114.9	0.591922	1.03307	0.38878	0.85413	1.15519	0.376229
	115	0.351409	1.03323	0.81164	1.08181	0.415654	0.477821
	115.1	0.436426	0.38011	0.766505	0.5486	0.575006	1.12242
	115.2	0.789517	0.980798	0.179367	0.938725	0.251616	1.12419
	115.3	0.791907	0.312196	1.03777	0.741496	0.607298	0.689108
	115.4	1.18212	0.904611	0.126587	0.409367	0.55554	0.368309
	115.5	1.0078	0.672145	1.096	0.751271	0.684021	0.976115
	115.6	0.0371394	0.194073	1.11377	0.430174	1.15306	0.777725
	115.7	1.01025	0.252893	0.21526	0.628188	0.10834	0.484716
	115.8	0.965695	0.735773	1.08521	0.873134	0.881851	0.0113692
	115.9	0.393506	0.129755	0.907543	0.90199	0.665223	0.170887
	116	0.783892	0.65887	0.314545	0.942113	0.125004	0.147063
	116.1	0.745159	0.701464	0.668144	0.672635	0.62717	0.0480221
	116.2	1.11829	0.147109	0.43501	0.847092	0.359078	1.02602
	116.3	1.20469	0.251871	1.14485	0.436737	0.186326	0.709712
	116.4	0.58196	1.02122	0.158729	0.113753	0.198181	0.693335
	116.5	1.15429	0.404148	0.749202	1.01321	0.68722	0.513804
	116.6	0.941171	0.691683	0.727184	0.400843	0.98751	1.03156
	116.7	0.0232319	0.164797	0.350947	0.709606	1.10258	0.793156
	116.8	1.13758	1.16903	0.119978	0.973082	1.12875	0.954546
	116.9	1.02038	0.0564499	1.04874	1.01543	0.416525	0.930485
	117	0.705151	1.05106	0.434802	0.932724	0.449461	0.987573
	117.1	0.0566189	1.04251	0.528322	0.522218	1.03659	0.872577
	117.2	0.917609	0.603274	0.673386	0.873317	0.0168465	0.941831
	117.3	0.598341	0.477534	1.13851	1.12191	1.16897	0.0599993
	117.4	0.494278	1.12032	0.236787	1.20203	0.980069	0.308364
	117.5	0.78797	0.107213	0.0437016	0.872995	0.925676	0.852472
	117.6	0.707574	0.960427	0.12346	1.11663	0.23888	1.16793
	117.7	0.91985	0.990244	0.210676	0.936678	0.736132	0.764827
	117.8	0.515786	0.584437	0.731336	0.717921	0.0785187	1.06997
	117.9	0.11902	0.456148	0.330786	0.0935719	0.51774	1.04675
	118	0.202022	0.556926	0.643744	0.835437	0.2509	0.542783
	118.1	0.324443	0.34607	0.720848	0.927174	0.345852	1.05601
	118.2	0.184364	0.0848674	0.251044	0.638035	1.10799	0.846289
	118.3	0.617598	0.3254	0.870191	0.901692	0.688733	0.668642
	118.4	0.35844	0.190473	0.230896	0.414666	1.069	0.166078
	118.5	0.62453	0.391351	1.12476	0.503273	0.620448	0.684583
	118.6	0.670471	0.244844	0.0236709	0.756115	0.760716	0.530108
	118.7	0.845177	0.660631	0.712365	0.722438	0.973503	0.955347
	118.8	0.865998	0.124514	0.382472	0.769669	0.42501	0.954076
	118.9	1.00265	0.179856	0.0025274	0.107248	0.621857	0.793881
	119	0.373596	0.582341	0.623922	0.124835	0.252546	0.283151
	119.1	0.418416	1.17654	0.971658	0.286432	0.638977	0.646358
	119.2	0.690331	0.074748	0.792898	1.08471	0.219223	0.6222
	119.3	0.290667	0.747726	0.162933	0.627224	0.769947	0.744216
	119.4	0.790939	0.575166	1.11547	0.665013	0.622691	0.594875
	119.5	1.00153	1.1746	0.46534	1.11715	0.966625	0.0029207
	119.6	0.829325	0.532743	0.22452	0.730369	1.01925	0.330841
	119.7	0.348938	0.917081	0.378026	0.402678	0.680019	0.996844
	119.8	0.458574	1.01202	0.913156	0.471869	0.58641	0.442354
	119.9	0.355006	0.691143	0.909981	0.402685	0.172962	0.264088
	120	1.01092	1.01075	0.0152867	0.597477	0.728906	1.07039
	120.1	0.352957	0.629062	0.113972	0.115005	0.401075	0.261304
	120.2	0.86116	0.405396	1.16695	0.169913	0.607954	1.06011
	120.3	0.653861	0.61464	0.16228	0.919454	0.600798	1.00278
	120.4	0.0686872	0.675986	0.759595	1.08349	0.63451	0.616204
	120.5	0.482133	0.150515	0.298442	0.240152	0.231841	0.227313
	120.6	0.786684	0.582615	0.15614	0.0743201	0.17029	0.623922
	120.7	0.016854	0.570803	0.495289	0.835029	1.01309	0.959907
	120.8	0.44612	0.004124	0.696197	0.869455	1.14423	0.932982
	120.9	1.20001	1.16501	0.305862	0.140318	0.524437	0.732267
	121	1.14854	0.439875	0.205366	0.587379	0.358382	0.215643
	121.1	0.159387	0.45696	0.815059	0.998076	0.199993	0.995758
	121.2	0.361164	0.445294	0.172733	0.0776111	0.56125	0.952618
	121.3	1.16658	0.353118	0.0238414	1.09611	0.0298613	1.18554
	121.4	1.18159	0.851912	0.777581	0.958144	0.718937	0.808724
	121.5	0.615631	0.318987	0.271836	0.872575	0.953852	0.809875
	121.6	0.290855	0.345616	0.194484	1.02609	0.0379733	1.12598
	121.7	0.690651	0.104946	0.0100462	0.629432	0.43442	0.500788
	121.8	0.717584	0.227805	0.40285	0.531141	0.76948	0.599107
	121.9	0.839685	0.248356	0.767858	0.645153	0.298702	1.18429
	122	1.10649	0.596817	1.16974	0.808981	0.279322	0.682552
	122.1	0.346649	0.351624	0.865902	0.654656	1.10573	0.0073683
	122.2	0.319966	0.352462	0.7124	0.388114	0.295068	0.36188
	122.3	0.219831	1.17734	0.92793	1.02082	1.0134	0.281569
	122.4	0.840538	0.0116758	1.0816	0.831666	0.443244	0.344655
	122.5	0.365639	1.17514	0.345504	0.361976	1.05352	0.411211
	122.6	0.452456	1.19954	0.125219	0.0849548	0.097643	0.925101
	122.7	0.555676	0.23275	0.490926	0.361903	0.8211	0.490241
	122.8	0.553792	1.17564	0.128994	1.016	0.308407	0.464496
	122.9	0.0772924	1.00248	0.219658	0.406408	0.0616887	0.112381
	123	0.518807	0.0818488	0.0106672	0.697257	1.17113	0.661892
	123.1	1.18868	1.06146	1.197	0.29042	0.113758	1.1624
	123.2	0.242172	0.382261	1.10871	1.19331	1.10464	0.637153
	123.3	0.641235	0.414215	0.197758	0.167718	0.592271	0.114462
	123.4	1.00812	0.660572	1.20616	0.511321	0.613921	0.724228
	123.5	0.824009	0.535141	0.151903	0.676608	1.20047	1.11187
	123.6	0.717193	0.644122	0.621923	0.418878	0.826882	0.55154
	123.7	0.53187	1.05681	1.18007	0.626086	0.433188	0.365809
	123.8	0.939611	0.721878	0.878119	0.263581	1.00953	0.524525
	123.9	0.248391	0.604723	0.98026	0.24934	1.04019	0.734071
	124	0.149414	0.0314206	1.08138	0.892844	0.635023	0.278289
	124.1	0.702275	1.09067	1.02299	0.900342	0.735935	0.669772
	124.2	0.487398	1.00702	0.668562	0.353748	0.199774	0.337308
	124.3	0.134596	1.12591	0.403796	0.987544	0.689883	0.305281
	124.4	0.626745	0.841659	0.858746	0.653374	0.804745	0.0850269
	124.5	0.814815	0.754818	1.13746	0.671532	0.786491	0.725078
	124.6	0.0569032	0.478335	0.636435	0.0283232	0.244968	0.679731
	124.7	0.486399	1.03054	1.00718	0.484701	0.533175	0.946753
	124.8	0.488002	0.971875	0.520908	0.0454045	0.985346	0.843036
	124.9	0.613697	0.112504	0.990286	0.587228	1.03306	0.603357
	125	0.601338	0.647835	1.09672	0.846837	0.371286	0.0394903
	125.1	0.891595	1.12459	0.221559	0.863104	0.47092	0.920288
	125.2	0.669319	0.782973	0.324326	0.175482	0.870221	1.00441
	125.3	0.224999	0.652845	0.303932	0.913797	0.20581	0.0813441
	125.4	0.905297	0.657101	0.844762	1.13299	0.369097	0.882079
	125.5	0.804069	0.788019	1.05662	0.974176	1.08339	0.0540211
	125.6	1.07576	0.10723	0.965109	0.813169	0.24871	0.965573
	125.7	0.81098	0.926886	0.698721	0.312238	0.951094	0.18769
	125.8	0.0471633	1.04498	0.253053	0.26206	0.0262504	0.308882
	125.9	0.655737	0.920691	0.33498	0.107038	0.921392	0.0156795
	126	0.448164	0.128744	0.592788	0.902436	0.468797	0.759596
	126.1	0.777299	1.02204	0.586046	0.0440489	1.05243	0.577836
	126.2	0.529715	0.29311	0.179539	0.219184	0.224041	1.0238
	126.3	1.05445	0.264114	1.19245	0.223763	0.163183	1.08137
	126.4	0.321182	0.414023	0.288446	0.225272	0.767649	0.285575
	126.5	0.984474	0.622121	0.867099	0.361439	0.311085	0.0936404
	126.6	1.16642	0.0792209	0.398104	0.0033887	0.539926	1.14214
	126.7	1.13365	1.13459	0.780549	1.00123	0.0826948	1.09696
	126.8	0.0965657	0.924528	0.807098	1.12145	0.794173	0.925637
	126.9	0.372708	1.10216	0.808549	0.811061	0.29751	0.0608232
	127	0.711112	0.119549	0.282017	0.647124	0.90685	0.0194177
	127.1	0.973695	0.539868	0.290856	0.462645	0.200666	0.0722832
	127.2	0.38321	0.767932	0.0621323	0.404848	0.842583	0.780414
	127.3	0.104698	0.956509	0.73785	1.00039	1.13595	0.259084
	127.4	0.544313	0.844175	0.740835	0.119136	0.0509726	0.734619
	127.5	1.08378	0.250208	1.19579	0.575063	0.795209	0.628453
	127.6	0.509018	0.996946	0.192957	0.493149	0.113816	0.180357
	127.7	0.0392984	0.195496	1.12496	0.761274	1.1075	0.664216
	127.8	0.498557	0.897782	1.06306	1.07032	0.050205	0.777384
	127.9	0.643934	0.337116	0.0742971	1.13053	0.317249	0.208709
	128	1.02257	0.005296	1.06499	0.0293175	0.161485	1.14023
	128.1	0.0518992	0.449511	0.353907	0.672641	0.579647	0.73101
	128.2	0.790067	0.68194	0.886161	1.18248	0.97391	0.775157
	128.3	0.606529	1.12297	0.384861	0.300591	0.447974	0.948291
	128.4	0.063697	0.617538	0.944296	0.0033282	0.365033	1.15676
	128.5	0.0696511	0.567021	1.14407	0.135242	0.933434	0.671384
	128.6	0.388733	0.0879056	0.105871	0.689807	1.0727	1.06119
	128.7	1.06604	0.097844	1.14077	0.672346	0.710981	0.764169
	128.8	1.11125	0.462611	0.962035	0.417715	1.01159	0.307603
	128.9	0.35812	0.261692	0.750844	0.740317	1.14183	0.770373
	129	0.755144	1.00395	0.2352	0.647187	0.0558807	0.762555
	129.1	0.687307	0.610048	1.18936	0.516036	0.519648	0.267983
	129.2	0.029977	0.646664	0.0693205	1.12617	0.558362	0.691026
	129.3	0.350633	0.447733	0.864303	0.9227	0.0203516	1.05173
	129.4	0.26632	0.459828	0.353671	0.561532	0.430319	0.427711
	129.5	1.1798	0.232596	0.896992	0.373013	1.03374	0.471324
	129.6	0.370208	1.0329	0.761087	1.09187	0.462399	0.435395
	129.7	0.663754	0.789766	0.845466	1.18638	0.131784	0.554372
	129.8	0.239669	0.103554	0.266941	0.800095	0.285289	0.987919
	129.9	1.1459	1.0846	0.945668	0.143021	0.604759	0.912327
	130	0.343464	0.920059	0.154276	0.468805	0.0336635	0.687008
	130.1	0.546908	0.432134	0.647326	1.1638	1.13395	0.275793
	130.2	0.9079	1.06642	0.704473	0.27773	0.0239217	1.15056
	130.3	0.973811	0.926646	1.05069	0.179319	0.0743263	0.728428
	130.4	0.795335	0.240885	0.870014	0.174614	0.80127	0.854681
	130.5	0.0759614	0.371507	0.410552	0.128061	0.46133	0.103985
	130.6	0.0620525	0.596354	0.932564	0.548472	0.234264	1.1025
	130.7	0.116652	0.742221	0.918837	0.475703	0.815463	0.760216
	130.8	0.949507	0.135334	0.959257	0.191294	0.347994	0.681851
	130.9	0.571497	0.752902	0.509289	0.758786	0.481964	0.492173
	131	1.10366	0.12701	0.814258	0.652495	0.98912	0.614869
	131.1	1.11044	0.645857	0.766467	1.18202	1.1641	0.415953
	131.2	1.13137	0.202177	1.04983	0.587946	1.01624	0.219924
	131.3	1.15192	0.292348	0.869687	0.37526	0.254345	0.864307
	131.4	0.740512	0.480225	0.751913	0.0577859	0.0637981	0.673
	131.5	0.875601	0.184575	1.07579	0.676231	1.10482	0.757535
	131.6	0.687218	0.380632	0.541734	0.657553	0.0489916	0.832498
	131.7	0.478021	0.404379	0.993764	0.95867	0.0315931	0.596221
	131.8	0.45611	0.345033	0.44257	0.787607	0.845423	0.400139
	131.9	0.109685	0.538442	0.431182	0.0841532	0.521972	0.173706
	132	0.975522	0.104055	1.12675	1.06598	0.403728	1.19493
	132.1	0.698099	0.0278751	1.08024	0.272971	0.376837	0.0465372
	132.2	0.0685977	0.474444	0.916726	1.12778	0.885431	0.622696
	132.3	0.556877	1.07403	0.0643371	1.0006	1.16596	0.0827641
	132.4	0.540842	0.542649	0.811285	0.588991	0.493085	0.726332
	132.5	0.416164	0.91561	0.908303	1.11198	1.00118	0.58236
	132.6	1.08835	1.13009	0.534876	1.18772	1.18811	0.836982
	132.7	0.557569	0.61656	1.05577	0.657491	0.233825	0.495819
	132.8	0.815585	0.21621	0.812364	0.675596	1.14602	0.623257
	132.9	0.448223	0.195088	0.91685	0.925154	0.881722	0.689066
	133	0.228524	1.08149	0.142588	0.211169	0.792511	0.775429
	133.1	0.166386	0.327747	1.15193	0.365832	0.826315	1.09082
	133.2	0.381789	0.856103	0.788215	0.891134	0.804287	0.994984
	133.3	0.480563	0.593013	0.770512	0.214083	0.701053	0.405179
	133.4	1.04597	1.12586	0.698474	0.586253	0.302372	0.0819865
	133.5	0.0501009	0.121048	0.269512	0.535628	0.874072	0.765811
	133.6	0.482078	0.0754513	0.287224	0.150838	0.667423	0.0107017
	133.7	0.532	0.56301	0.246359	0.557073	0.492389	0.212692
	133.8	0.235449	0.0821095	0.0112385	0.892292	0.755277	0.832622
	133.9	0.159159	0.0003204	0.964257	0.771753	0.469345	1.09149
	134	0.928235	0.656877	0.196254	0.424657	0.0247994	0.460532
	134.1	0.393966	0.518368	0.345783	0.265909	0.552103	0.877812
	134.2	0.22045	0.652143	0.845462	0.543552	0.414888	0.385599
	134.3	0.490577	1.10395	0.468204	0.665974	0.971611	0.718517
	134.4	0.597261	0.0638424	0.223962	0.770369	0.746648	0.637792
	134.5	0.174117	0.731989	1.10535	0.140947	1.13981	0.580583
	134.6	0.727458	0.16994	0.172991	0.456735	0.833484	0.222819
	134.7	1.19436	1.01064	0.472259	1.0651	0.511525	0.982844
	134.8	0.576721	0.438116	0.146539	1.10609	0.111526	0.921588
	134.9	0.23945	0.762821	1.08494	0.75918	1.09346	0.0747007
	135	0.566921	1.15735	0.269049	0.530599	0.688972	0.0229971
	135.1	0.266603	1.09141	0.134403	0.0038058	0.470844	0.206406
	135.2	0.450639	0.876886	1.18075	0.567116	0.624548	0.275313
	135.3	1.11147	0.754843	0.384304	0.500836	1.05248	1.1642
	135.4	0.506705	0.824499	0.172487	1.00289	0.45583	0.100928
	135.5	0.856973	0.0774629	0.188625	0.775392	0.782779	0.531958
	135.6	0.483508	1.07739	1.10602	0.762665	0.364494	1.07233
	135.7	0.85995	0.0514075	0.732101	0.900964	0.420377	1.08039
	135.8	0.824398	0.105441	0.143807	0.736058	0.720478	0.64767
	135.9	0.626785	0.582535	0.217401	1.00791	0.695936	0.235609
	136	0.879614	1.02521	0.14814	0.834912	0.835607	0.307125
	136.1	1.05656	1.10636	0.557988	0.332139	0.591098	1.18063
	136.2	0.690512	0.86605	0.929769	0.617911	0.852685	0.915785
	136.3	0.692158	0.458241	0.0542083	0.271843	0.390917	0.226219
	136.4	0.773373	0.756738	0.390191	0.431996	0.0015812	0.372388
	136.5	0.966713	0.361573	0.670272	1.01769	1.09878	0.865456
	136.6	0.634884	0.0878017	0.451885	0.129663	0.414921	0.14052
	136.7	0.410332	0.482	0.345576	0.130267	0.460529	1.19817
	136.8	1.11161	0.876045	0.87883	0.566637	0.154183	1.02806
	136.9	1.01219	0.0127217	0.270363	1.09755	0.595997	0.937353
	137	0.602941	1.12724	0.120074	0.102782	0.460472	0.211378
	137.1	0.945852	0.182397	1.09303	0.797123	0.807099	0.923818
	137.2	0.270774	0.862067	0.260703	0.248612	0.429214	0.135504
	137.3	0.197718	0.176626	0.257992	0.92701	0.0970263	0.241699
	137.4	1.05424	0.961429	1.18867	0.612544	0.723032	0.926221
	137.5	0.864461	0.763959	0.959404	0.652912	1.11268	0.0354827
	137.6	0.548526	0.554489	0.852954	1.20301	1.20429	0.544029
	137.7	0.4228	1.09745	1.19132	0.414459	1.00097	0.131743
	137.8	0.478834	0.321728	0.135624	0.541663	0.228805	0.51497
	137.9	0.629867	0.0830875	0.179302	1.16066	0.510487	1.02305
	138	1.08335	0.505197	1.17504	0.255528	1.02459	0.858866
	138.1	0.72956	1.05748	0.659713	0.454756	0.345797	0.256952
	138.2	0.558265	0.866012	0.760908	1.06484	0.236633	0.731969
	138.3	0.537291	0.829948	0.953027	1.14973	0.118232	0.604808
	138.4	0.713388	0.401353	1.12972	0.0369532	0.142015	0.463112
	138.5	0.425768	0.22292	1.04175	0.797926	0.396569	0.0182984
	138.6	0.375148	0.900037	0.933933	0.552922	0.372078	0.377659
	138.7	0.393383	0.518388	1.0725	0.789412	0.502169	0.223764
	138.8	0.0369835	1.07038	0.0958644	0.634211	0.133426	0.447892
	138.9	1.00763	0.0091707	0.353327	1.03103	0.178085	0.156816
	139	0.854949	1.10365	1.10066	0.567556	1.04327	0.275968
	139.1	0.0699512	0.489745	0.070466	0.712425	1.16391	0.436941
	139.2	1.04671	0.934199	0.977583	0.41975	0.141103	0.0761664
	139.3	0.754393	1.11403	0.805528	0.311073	0.111265	0.201223
	139.4	0.146561	0.504695	0.463817	0.509207	0.10601	0.462698
	139.5	0.545915	0.266959	0.321755	0.902338	0.35495	0.767867
	139.6	0.620348	1.14087	0.130932	1.07878	0.47406	1.09881
	139.7	0.998333	0.380298	1.02366	0.186558	0.863443	0.0181642
	139.8	0.822857	0.265249	0.139402	0.918253	1.16224	0.0482242
	139.9	0.291873	0.772945	0.396714	0.860206	0.368001	0.0608931
	140	1.07089	0.438795	0.855767	0.936164	0.463526	0.714071
	140.1	0.428222	0.70872	0.325091	0.65558	0.0782044	1.00877
	140.2	0.766798	1.01922	0.0910539	0.219364	0.829236	0.189627
	140.3	0.29292	0.0157511	0.538905	0.105215	0.579338	1.1513
	140.4	0.554541	0.170359	1.12163	1.18249	0.823566	0.314755
	140.5	1.16773	0.43524	0.477031	0.496038	1.10587	1.01327
	140.6	0.563215	0.377393	1.12107	0.314716	0.47791	0.07793
	140.7	0.871361	0.812077	0.79638	0.910049	0.630242	1.09624
	140.8	0.974554	1.13193	0.300841	0.666367	0.608754	1.09919
	140.9	0.413599	0.0287784	0.741281	0.754964	1.05071	0.497659
	141	0.0093933	0.0811247	0.526223	0.726069	1.08598	0.895173
	141.1	0.592013	0.377273	0.863282	1.19943	0.436324	0.542046
	141.2	1.20208	1.00229	0.142263	0.620894	0.149775	0.394839
	141.3	1.03397	0.177341	0.586053	0.28027	0.403347	0.0199351
	141.4	0.298729	0.558483	0.944127	0.599942	0.967494	0.344744
	141.5	0.119559	0.976412	0.671028	0.300524	0.272154	0.504563
	141.6	1.07884	0.41157	0.616832	0.769329	0.210199	0.299677
	141.7	0.925136	0.563747	0.0389471	0.85591	1.14503	0.422544
	141.8	0.314186	0.243341	1.17175	0.0960701	0.45726	1.00435
	141.9	0.682212	0.790182	0.328666	0.708774	1.01029	0.70069
	142	0.243091	0.105943	0.39684	0.959212	0.599404	0.490479
	142.1	0.430035	0.752307	0.633874	0.352113	0.95277	1.00663
	142.2	0.689041	0.977018	0.269034	0.759896	1.16329	1.12217
	142.3	0.826845	0.854363	0.966509	1.14076	0.120989	1.19533
	142.4	0.734527	0.686105	1.1457	0.279112	0.549463	1.15672
	142.5	0.559464	1.16896	0.666116	0.442425	0.185852	0.0285148
	142.6	1.16545	0.849508	0.81741	0.973866	0.996722	0.341058
	142.7	0.144081	0.933588	0.359908	0.180192	0.564813	1.01255
	142.8	1.20671	0.382414	0.720545	0.056337	1.08768	0.444164
	142.9	0.774306	0.273574	0.588286	0.289793	1.13731	0.623125
	143	0.371873	0.250812	0.477514	0.37379	0.921822	1.14748
	143.1	0.400307	0.730349	0.004819	0.411693	0.620948	0.560004
	143.2	0.168157	0.164173	0.866036	0.46185	0.490257	0.209991
	143.3	0.180137	0.26027	0.583402	0.502681	0.112549	0.928561
	143.4	0.296387	0.248624	0.837706	0.871116	0.842896	0.902608
	143.5	0.740596	0.629958	1.13552	0.0996628	1.01321	0.0779267
	143.6	1.12031	1.14613	0.0680811	0.0121968	0.896741	0.182913
	143.7	1.19287	0.403384	0.423188	0.407129	1.08502	0.424074
	143.8	0.724487	0.905842	0.481971	1.1709	0.1933	0.677452
	143.9	1.1164	1.1262	0.792973	1.15106	0.265909	0.643705
	144	0.964158	0.476811	0.737925	0.885792	0.265292	0.95053
	144.1	0.310763	1.19304	0.684097	0.0780803	0.562087	0.30584
	144.2	0.473218	0.478287	0.855576	0.95202	0.200242	0.62397
	144.3	0.500916	0.880394	0.0887604	0.974259	0.373142	0.689798
	144.4	0.508544	0.888911	0.84892	0.0112208	0.987679	0.0043451
	144.5	1.07777	0.745502	0.260736	0.0023477	0.673517	0.945594
	144.6	0.981269	1.12128	0.0947729	0.25059	0.801627	0.664003
	144.7	0.694733	0.36966	0.90534	0.534927	0.873958	0.1542
	144.8	0.474159	0.108308	0.713778	0.460323	0.646742	0.99339
	144.9	1.06023	0.264288	1.20167	0.791554	0.325678	0.5665
	145	0.343138	0.720075	0.614629	1.01313	0.0593072	0.919736
	145.1	0.0751664	0.771177	1.14459	0.328899	0.861292	0.04826
	145.2	0.486641	0.984596	0.798358	0.254024	0.741485	0.759604
	145.3	0.515021	0.374317	0.0537236	0.608322	0.717289	0.548524
	145.4	0.480272	0.465967	1.16856	0.786489	1.13973	0.0771031
	145.5	0.525903	0.935167	0.0959545	0.62969	0.280412	0.0324406
	145.6	0.527973	0.83187	0.420217	1.1312	0.797096	0.228954
	145.7	0.0876692	0.390091	1.2033	0.987997	1.10782	0.445623
	145.8	0.598103	0.841096	0.598304	0.359968	0.39112	1.13316
	145.9	0.558202	0.208387	0.0369905	0.90237	0.884936	0.912633
	146	1.13265	1.03123	0.459279	1.17986	0.773375	1.06949
	146.1	0.984584	1.00441	1.17338	0.399962	0.0121113	0.447159
	146.2	0.1468	0.185596	0.99787	0.173576	1.19963	0.716434
	146.3	0.162921	0.619093	0.289283	0.900973	1.13676	0.876744
	146.4	0.538637	0.580986	0.471056	0.287611	0.506997	0.82409
	146.5	0.699282	0.220491	0.897376	0.910243	0.729012	0.98208
	146.6	0.372867	0.971983	0.182697	0.402327	0.0792961	0.46584
	146.7	0.549554	0.0546139	1.00577	0.89623	0.369123	0.0889584
	146.8	0.240263	0.270537	1.12125	0.0943329	0.688963	0.168077
	146.9	0.616506	0.0344308	1.08679	0.659057	0.19963	0.608696
	147	0.719147	0.430227	0.385826	0.0427263	0.318427	0.366457
	147.1	1.08349	0.765587	0.781209	0.231441	0.200422	1.05237
	147.2	0.882556	0.242581	0.345067	0.966613	0.732988	0.239924
	147.3	1.04196	0.0072559	0.313837	0.000663	1.01647	0.0488762
	147.4	0.757946	0.295253	0.0971429	0.678262	0.622147	0.155155
	147.5	0.447382	1.05675	0.705602	0.983209	0.971809	0.46512
	147.6	0.917739	0.847357	0.194955	0.850808	1.06584	0.677278
	147.7	1.00539	0.487732	1.0669	0.933495	0.362447	0.284536
	147.8	0.479197	0.441359	0.0948867	0.895497	0.309162	0.963568
	147.9	0.681679	1.1935	0.744027	0.969307	1.18007	0.828607
	148	0.381357	0.0289104	0.839532	1.20605	0.868767	0.871997
	148.1	1.0384	0.981819	0.269498	0.569616	0.127207	0.747579
	148.2	0.107029	0.683792	0.976526	0.319815	0.307227	0.158924
	148.3	0.603744	1.13982	0.38502	0.826998	1.09714	0.626143
	148.4	0.923991	0.272964	0.954809	0.0028726	0.871206	1.13539
	148.5	0.484331	0.942804	0.538407	0.18045	0.236697	0.595449
	148.6	0.463072	0.402845	0.588172	1.17923	0.261377	0.715326
	148.7	1.08947	0.663838	0.659586	0.327799	0.943422	0.483423
	148.8	0.521106	0.629379	1.08014	0.490803	1.16838	0.0392412
	148.9	0.327479	0.0815787	0.336435	0.94526	0.974779	0.130756
	149	0.232057	1.02884	0.300794	0.651748	0.578221	0.158395
	149.1	0.630212	1.07047	0.990229	0.0907832	0.0870648	1.17403
	149.2	0.96658	1.08351	0.38849	0.48205	0.915627	0.149365
	149.3	0.657761	0.193654	1.05003	0.63037	0.578626	0.909577
	149.4	1.002	0.481459	0.752155	0.324249	1.09695	0.709657
	149.5	1.1033	0.447212	1.06072	0.56674	0.762722	1.12049
	149.6	0.0653238	0.181569	0.694613	0.046958	0.125491	1.09934
	149.7	0.051176	0.872941	0.472258	0.874478	0.461186	0.251067
	149.8	0.626711	1.20575	0.24617	1.07557	1.18564	0.0104091
	149.9	0.637579	0.31319	0.872355	0.404724	0.72579	0.936924
	150	0.758532	0.489491	0.152217	1.0227	1.08162	0.794822
	150.1	1.01195	0.465378	0.98249	0.663167	0.702696	0.199334
	150.2	0.986502	0.507745	0.396643	0.989336	1.11371	0.76226
	150.3	0.265705	1.03328	0.333788	0.824821	0.215128	1.03228
	150.4	0.231136	0.967912	0.515028	0.809955	0.016599	0.826518
	150.5	0.807704	0.741961	0.937488	0.600088	0.0290806	0.02676
	150.6	0.98857	0.408718	0.474462	0.851643	0.669317	1.07457
	150.7	0.307302	0.911338	0.206004	1.0329	0.824125	0.67508
	150.8	0.846217	1.05228	1.09088	0.238799	0.527448	0.939141
	150.9	0.899027	0.482801	0.106327	0.868044	0.377191	0.498631
	151	0.0706168	1.15392	1.0002	0.957172	0.51608	1.18872
	151.1	0.667609	0.837929	0.909293	0.0722024	0.400696	1.16823
	151.2	0.253976	0.0689516	0.306651	0.672123	0.700584	0.56655
	151.3	0.719469	0.163442	0.194335	1.08876	0.828798	0.0305445
	151.4	0.678956	0.187532	0.192475	0.388847	0.207386	0.648714
	151.5	0.84075	1.02153	1.00259	0.650466	0.0778217	0.991742
	151.6	1.06447	0.58688	0.714553	1.1909	0.0430467	0.666894
	151.7	0.831124	1.06942	0.083839	0.072653	1.03088	0.228364
	151.8	0.152642	0.335458	1.17807	0.222292	0.711799	0.899006
	151.9	0.718498	0.746421	0.469397	1.08924	0.348546	0.345846
	152	0.718939	1.09376	1.11606	0.779429	0.0205948	0.128694
	152.1	0.214643	0.0838212	0.534786	0.400791	0.283178	0.978022
	152.2	0.86805	0.282518	0.691546	0.304736	1.14499	0.507144
	152.3	0.533625	0.298867	0.194694	0.0060634	0.80882	1.11465
	152.4	1.15871	1.0108	0.814144	0.742686	0.617593	0.901709
	152.5	1.17113	0.154827	0.0169422	0.325632	1.19534	0.945682
	152.6	0.375145	1.14911	0.870225	0.485868	0.559577	0.723745
	152.7	0.626539	0.472336	0.80671	0.414395	0.646676	1.19886
	152.8	0.0024912	0.702206	0.998713	1.07282	0.254877	0.234162
	152.9	0.0454573	0.218416	0.450682	0.588757	0.799554	0.435904
	153	0.979701	0.509127	0.999377	0.126181	0.633071	0.635567
	153.1	0.852899	0.538455	0.157623	0.768866	1.1212	0.33498
	153.2	0.998125	1.20515	0.315912	0.366212	0.838282	0.941409
	153.3	0.253283	0.86469	0.715076	0.654719	0.434366	0.583462
	153.4	0.773875	1.04147	0.92394	0.565611	1.13907	0.47363
	153.5	0.642612	0.285838	0.273134	0.945163	0.46178	0.478087
	153.6	0.182222	0.247248	0.96153	0.49962	0.310132	0.607593
	153.7	1.18519	0.179294	0.403367	0.919801	0.577762	0.353473
	153.8	1.05474	0.417995	0.930861	0.454799	1.14688	1.18573
	153.9	0.552865	0.845312	0.897073	1.05962	0.684162	1.07805
	154	0.909912	0.607297	0.407525	0.0222962	0.765775	1.17176
	154.1	0.907366	0.267064	0.781821	0.727068	1.20177	0.2729
	154.2	0.229711	0.584587	0.170506	0.698748	0.545367	0.943536
	154.3	0.412951	0.204947	0.403256	0.941602	0.378996	0.334745
	154.4	1.04475	0.328538	0.579857	0.272639	0.558885	1.00282
	154.5	0.894301	0.320748	1.08849	1.14833	0.763762	0.250931
	154.6	0.108914	0.261014	0.355722	1.08939	1.01687	0.0146501
	154.7	1.01321	0.0866892	0.215478	0.867392	1.14213	0.710145
	154.8	0.572742	0.401499	1.17457	1.0205	0.708858	1.1019
	154.9	0.678482	0.327709	0.126483	1.01604	0.58287	1.07984
	155	1.15019	0.31819	7.01e-05	0.713679	1.18453	1.17967
	155.1	0.561651	0.189713	0.476759	0.545846	1.11056	1.0346
	155.2	0.765425	0.678968	0.585144	1.1897	0.719808	0.63943
	155.3	0.281075	0.098675	0.0632212	0.909988	1.1005	0.293538
	155.4	1.06136	0.352726	0.642682	0.991137	0.892213	1.11018
	155.5	0.104958	0.137491	0.250274	0.645127	0.822801	0.666002
	155.6	0.848448	0.522733	0.635427	1.03402	0.524193	0.432997
	155.7	0.509386	1.19054	0.125408	0.360485	0.841876	0.929101
	155.8	0.0181207	1.07277	0.283984	0.713725	0.637879	0.896137
	155.9	1.17242	0.632872	0.800246	0.126241	0.546258	0.401921
	156	0.0517005	0.744719	0.800991	0.547894	1.0824	1.02754
	156.1	0.622562	0.0407428	0.238393	0.127779	1.17015	0.163325
	156.2	0.501998	0.264479	0.595852	0.617869	0.0372353	0.721665
	156.3	0.738165	0.591286	0.654601	1.1463	0.165854	0.989313
	156.4	0.52669	0.727646	0.467098	0.762891	0.382777	0.263953
	156.5	0.110654	0.697532	0.0176466	0.718553	0.201385	1.08171
	156.6	0.589124	0.174382	0.606953	1.17767	0.521456	0.878799
	156.7	0.0762886	0.799368	0.158764	0.0935723	0.829093	0.806383
	156.8	0.360454	0.0390049	0.123751	0.322785	0.0123607	0.795505
	156.9	0.508651	0.252336	1.04537	0.0300971	1.14565	0.0009868
	157	0.44423	0.702642	0.403922	0.253179	0.555398	0.739753
	157.1	1.1557	0.766489	0.162068	1.10055	0.836359	0.151221
	157.2	0.362349	0.630227	0.978945	0.415537	1.1274	0.88932
	157.3	0.0532183	1.09463	0.788745	1.12785	0.394535	1.19651
	157.4	0.701222	0.58951	0.049655	0.495662	0.0972868	0.650381
	157.5	0.467215	0.804402	0.490977	0.646875	0.796845	0.934386
	157.6	0.353602	0.016379	0.769056	0.514133	0.187728	1.10679
	157.7	0.91703	0.476527	0.406286	0.198226	0.348253	0.415142
	157.8	0.136485	1.1914	0.799516	0.392321	0.749357	0.0113073
	157.9	1.06313	0.392825	0.951345	0.704701	1.08893	0.494587
	158	1.11182	0.0546876	0.123327	0.731398	0.384301	0.149902
	158.1	0.634291	0.885398	0.508492	0.971711	0.993338	0.696024
	158.2	0.221669	0.345396	0.791076	0.0924816	0.532741	0.875747
	158.3	0.616186	0.477576	0.677354	0.0376338	0.924976	0.507634
	158.4	1.20341	0.565262	0.868414	1.10003	0.895689	0.717903
	158.5	0.451298	0.379905	0.410063	0.195602	0.820392	0.707285
	158.6	0.739944	0.87256	1.15896	1.12144	0.659694	0.561719
	158.7	0.0940648	1.07136	0.832903	1.1674	0.623582	0.209937
	158.8	0.797469	0.511143	1.0607	0.160595	0.02902	0.818427
	158.9	1.14911	0.250078	0.538376	1.12461	0.239513	0.202162
	159	0.577811	0.478555	0.0545702	1.01335	0.0446939	1.10944
	159.1	1.02826	1.15826	0.555851	0.370314	0.717503	1.17292
	159.2	0.428959	0.665472	0.837017	1.00666	0.916977	0.809249
	159.3	0.377563	0.0314909	0.330568	0.372419	0.429342	0.578684
	159.4	0.403727	0.587004	0.136634	0.547424	0.816189	0.313723
	159.5	1.01824	1.08608	0.835269	1.05233	0.905771	0.570613
	159.6	1.16223	0.406286	0.79556	0.426517	0.961729	0.0872061
	159.7	0.95894	0.161488	1.17535	0.814349	0.851477	0.183726
	159.8	1.17305	0.883788	0.111695	0.519821	1.01765	1.03517
	159.9	0.53589	0.361608	0.897725	0.555628	0.0744036	0.0409633
	160	1.16597	1.03874	0.453894	1.12157	0.433745	0.771951
	160.1	1.07964	0.0182502	0.0687733	0.897007	0.947337	0.555849
	160.2	1.03784	0.614054	0.771123	0.917237	0.112954	0.822877
	160.3	0.0078556	1.07132	0.289253	0.50849	0.0767576	0.405573
	160.4	0.102962	0.220378	0.739668	1.10999	1.03792	0.598163
	160.5	1.07825	0.457753	0.0892245	0.871175	0.308443	0.368869
	160.6	0.83888	0.0472776	0.841809	0.808218	0.845739	0.768912
	160.7	1.10863	0.214792	1.0329	0.111438	0.839961	0.3323
	160.8	0.624519	0.36733	0.643327	0.120568	0.789621	0.427532
	160.9	0.598032	0.582375	0.558476	0.522985	0.433704	0.136503
	161	0.214645	0.890014	0.544384	0.957498	0.246968	0.977708
	161.1	0.887789	0.729313	0.37158	0.302719	0.272451	0.905645
	161.2	1.0443	0.54573	0.0505762	0.944716	0.229873	0.879276
	161.3	0.98424	0.632208	0.123777	1.15122	0.351113	0.179941
	161.4	0.672911	0.449396	1.18202	1.14448	1.01331	0.182959
	161.5	0.806405	0.294695	0.307967	0.121251	0.708955	0.661908
	161.6	0.49954	0.467201	0.87123	1.00882	0.778444	0.246136
	161.7	0.238183	1.02786	0.296278	0.721241	0.146467	1.03528
	161.8	0.783953	0.894954	1.00249	0.172579	0.554335	0.509198
	161.9	0.419716	0.730072	0.893992	0.496047	0.881017	0.750967
	162	0.608826	0.909372	0.909808	0.0059953	0.759361	0.0671961
	162.1	1.19103	0.900476	1.2025	0.0494017	0.807193	0.0818357
	162.2	0.6351	1.09483	0.0962558	0.800009	0.547608	0.0508766
	162.3	0.669141	0.664257	0.581072	0.943236	1.05953	0.780527
	162.4	1.04743	0.691717	0.474398	1.13087	0.805745	0.121031
	162.5	0.650582	0.837788	0.464245	0.398076	1.16213	0.342068
	162.6	0.0042135	0.389906	0.0931652	0.324573	0.577354	0.417866
	162.7	1.0016	0.573824	0.0642054	0.486531	0.618042	1.12844
	162.8	0.781125	1.1092	0.75627	0.476974	0.669944	0.0840183
	162.9	1.13144	0.40272	1.20787	1.15284	0.624865	0.327195
	163	1.15672	0.952248	0.897504	0.655266	0.064245	0.862958
	163.1	0.183701	0.597672	0.453093	0.675912	1.11081	0.535341
	163.2	0.829935	0.291	0.428049	0.228936	1.10201	1.15141
	163.3	0.169729	0.104162	0.331534	0.0411428	0.228944	0.255353
	163.4	0.921347	0.492193	0.152116	0.829083	0.937612	0.151968
	163.5	0.246846	0.316028	0.864009	0.870387	0.566294	0.154042
	163.6	0.0319436	0.193543	0.486344	0.963131	0.962083	0.326553
	163.7	0.109298	0.206669	0.334362	0.288012	1.04541	0.233341
	163.8	1.01519	0.28347	1.07597	1.20151	1.13107	0.895357
	163.9	0.865399	0.822206	0.198841	0.0849387	0.564222	1.02922
	164	0.56707	0.527714	0.81425	0.669137	0.664096	0.555669
	164.1	0.641717	0.708952	0.749261	0.201035	1.0419	0.986866
	164.2	1.17072	0.835301	0.141123	1.11547	0.279857	0.351958
	164.3	0.166591	0.381199	0.459815	1.04315	0.642548	0.473365
	164.4	0.664808	0.685197	0.570661	0.914088	0.868143	0.262148
	164.5	0.685184	0.84943	0.907904	0.623937	0.503974	0.870694
	164.6	0.218796	0.369072	1.1731	0.955246	0.298406	0.666505
	164.7	0.203751	0.1803	0.841656	0.296843	1.04657	0.828537
	164.8	0.61592	0.179369	0.291417	0.781076	0.495155	0.549817
	164.9	1.07729	1.00392	0.237439	0.388568	0.0606501	0.553968
	165	0.525023	0.716748	1.1087	1.0242	1.14217	0.4064
	165.1	0.370148	1.07959	0.858361	0.734587	0.20807	0.204478
	165.2	1.04751	0.790865	0.198031	0.0466087	0.875539	0.857324
	165.3	0.774343	0.359588	0.543055	0.702656	0.275716	0.742801
	165.4	0.691143	0.765411	0.794837	0.149076	0.877181	0.393387
	165.5	1.05144	0.604574	1.16096	0.0049302	0.534116	0.100756
	165.6	1.17004	1.11651	0.0778455	0.722902	0.135445	0.105394
	165.7	0.746732	1.03245	0.411763	1.04721	0.462245	1.10446
	165.8	0.893176	0.53019	0.302558	0.288139	0.988297	0.911205
	165.9	0.399858	0.210552	0.679701	0.149425	0.513449	1.16962
	166	0.504199	0.254208	1.12427	0.240272	0.253096	0.88801
	166.1	0.642158	0.912211	0.225724	0.583677	0.0885698	0.395512
	166.2	0.249307	1.02014	0.101099	0.276452	0.177862	0.254036
	166.3	0.234408	0.288589	0.537346	0.38175	0.642227	0.357037
	166.4	0.831503	0.523086	0.435476	0.743511	0.137014	0.197251
	166.5	1.04775	0.325149	1.19837	1.05898	0.938351	0.732795
	166.6	0.66824	0.707816	0.801016	0.849418	0.70663	0.827144
	166.7	0.463464	0.639003	0.471114	0.762926	1.09413	1.07546
	166.8	0.262356	0.852807	0.841502	0.354881	0.396323	0.0795241
	166.9	0.334991	0.924884	0.948277	0.244415	1.13315	0.337844
	167	0.9917	0.467822	0.0335446	0.287544	0.521255	0.939706
	167.1	0.0255418	0.572266	0.501963	0.838403	0.860668	0.152344
	167.2	0.359032	0.0527224	0.417827	0.834416	0.577171	0.162362
	167.3	0.899278	0.381957	0.459266	1.10091	1.17552	0.104904
	167.4	0.340781	0.0169865	0.86969	0.0366536	1.08701	1.09266
	167.5	0.796223	0.979526	0.492133	0.345595	0.863526	0.625525
	167.6	1.17406	0.419813	0.235953	0.0326314	0.345877	0.364689
	167.7	1.14478	0.299114	0.404704	0.0674268	1.18041	1.05365
	167.8	0.448818	0.546081	0.771938	0.573239	1.04522	0.345533
	167.9	0.152516	0.966743	0.517768	1.00366	0.129172	0.813286
	168	1.09848	0.0749328	0.27489	0.316072	0.0767022	0.335691
	168.1	0.754854	0.60063	0.273417	0.802991	0.962285	0.440367
	168.2	0.0268108	0.233046	0.993878	0.33577	1.05707	0.615844
	168.3	0.429919	0.362332	0.252737	1.04965	0.655708	1.20148
	168.4	0.0463946	0.0067616	0.986289	0.817876	0.12561	0.769811
	168.5	0.482113	0.735766	1.11188	0.981944	0.349622	0.792117
	168.6	0.59106	0.708006	0.887597	0.0530275	0.277141	0.544715
	168.7	0.920701	0.262252	0.438843	0.0376493	0.165655	0.0302922
	168.8	0.423572	0.690303	0.343885	0.465362	0.512577	0.141855
	168.9	0.316647	0.73707	0.0449618	0.483411	0.79249	0.0316689
	169	0.371114	0.2228	0.893073	0.472148	1.13459	0.183147
	169.1	0.904915	0.80067	1.02093	0.471844	0.741284	0.584467
	169.2	0.457951	0.612398	0.7503	1.18795	0.494414	0.334117
	169.3	0.468151	1.14891	0.13152	0.298144	0.302213	0.941933
	169.4	1.13197	0.47937	1.03597	0.129527	0.747577	0.107219
	169.5	0.891434	0.772615	0.244083	0.648096	0.81187	0.899041
	169.6	0.534566	0.803513	0.336726	0.0826637	0.519698	0.395058
	169.7	0.559829	0.943185	0.592966	0.185208	0.111739	0.663559
	169.8	0.0419042	0.15044	1.08887	0.92628	0.782636	0.225922
	169.9	0.621268	0.847009	1.09559	0.781767	0.362869	0.691569
	170	0.963757	0.328098	0.256166	0.248133	0.927924	0.209776
	170.1	0.546829	0.093464	0.0400966	0.165399	0.435593	0.610392
	170.2	0.564136	0.60986	0.0691763	1.19124	0.94843	0.840869
	170.3	0.341659	1.03212	0.388471	1.05969	0.441842	0.542232
	170.4	0.489839	0.409456	1.19941	0.887573	0.290527	1.09812
	170.5	0.695051	1.00644	0.3207	0.467333	0.458856	0.654648
	170.6	1.14194	1.06573	1.00382	0.872256	0.0830165	1.0157
	170.7	0.0410333	0.857492	1.16372	0.331906	0.437566	0.289051
	170.8	0.626704	1.19526	0.77871	1.08831	0.551031	0.29112
	170.9	0.381312	0.701159	0.509244	1.18858	0.0062846	0.932825
	171	0.465013	0.776727	0.0659403	1.1922	0.886735	0.850669
	171.1	0.43639	0.762157	1.0055	0.449919	0.930104	1.14753
	171.2	0.541945	0.248894	0.803811	0.135809	0.339623	0.980978
	171.3	1.12403	0.843715	0.662757	1.07528	0.597929	0.334665
	171.4	1.18672	0.463397	0.612988	0.926968	0.336137	0.64342
	171.5	1.05625	0.259717	0.3485	0.670333	1.1933	0.479618
	171.6	0.58921	0.138763	0.787404	1.06049	0.721382	0.78587
	171.7	0.636798	0.0986609	0.727067	0.87311	0.315095	0.262061
	171.8	0.0968552	0.726827	0.854794	0.903359	0.418498	0.759593
	171.9	0.994886	0.181852	0.20217	0.309449	1.10279	0.419816
	172	0.963513	0.082909	0.363319	0.12504	1.01477	0.387387
	172.1	0.397573	1.09594	0.531744	1.14819	0.772177	0.458133
	172.2	0.929371	0.43221	0.855311	1.03737	0.751369	0.351284
	172.3	0.895822	1.12816	1.00688	1.05278	0.0043202	0.651846
	172.4	0.408539	0.856288	0.722844	0.733096	0.364262	0.640131
	172.5	0.0710298	0.648314	0.3896	0.545147	0.810701	0.675586
	172.6	0.699423	0.259355	1.20252	0.67231	0.614171	0.798582
	172.7	0.797859	0.587451	1.15931	0.641005	1.07391	0.891486
	172.8	1.12723	1.03137	0.915926	0.680749	0.437264	0.0153283
	172.9	0.356202	0.46911	0.309244	0.208579	0.0810291	0.190897
	173	0.991502	0.18596	0.161418	0.437651	0.237775	0.12014
	173.1	0.402748	0.234443	1.07029	1.17042	0.17012	0.947436
	173.2	0.841515	0.194161	0.577495	0.369088	0.758172	0.214204
	173.3	0.246182	0.670873	1.14915	0.77345	0.70757	0.0596671
	173.4	0.620208	0.834969	0.951732	0.614765	0.994078	0.342447
	173.5	0.650937	0.486006	0.66816	0.551716	0.973096	0.802773
	173.6	0.460708	0.59617	1.16913	0.837941	0.953725	0.944751
	173.7	0.845979	0.633091	1.0417	0.125966	0.600027	0.86312
	173.8	0.271774	0.236965	1.13708	1.10401	0.03739	0.378151
	173.9	0.76777	1.13767	0.578283	0.502942	0.121619	0.655979
	174	0.61954	0.398733	0.174556	0.476422	1.10602	0.476567
	174.1	0.918417	0.988371	1.12214	1.02327	0.498063	0.632319
	174.2	0.489889	0.834102	0.658521	0.0429883	1.02971	1.19728
	174.3	0.141699	0.0823031	0.66032	0.330743	0.509996	0.750321
	174.4	1.01324	0.324968	0.190272	0.501627	0.808831	0.690683
	174.5	0.392003	0.217785	1.05979	0.252638	0.652953	0.822759
	174.6	0.498651	0.89619	0.551173	1.15947	0.365426	1.11458
	174.7	1.05078	1.10931	0.0083495	0.302058	0.101742	0.773158
	174.8	1.12758	0.600607	1.08194	0.164786	0.230405	0.729472
	174.9	0.966431	0.262111	0.368919	0.708892	0.930019	0.0856837
	175	0.441988	1.07915	1.01865	0.887124	0.404022	0.870835
	175.1	0.411844	0.304933	0.941224	0.944796	0.823007	0.9977
	175.2	0.491572	0.139324	0.854769	0.348067	0.845275	0.0965587
	175.3	1.01878	0.812035	0.813931	0.0033442	0.528199	0.252952
	175.4	0.310813	0.801275	1.02952	0.0102359	0.140319	0.658574
	175.5	0.688001	0.471863	0.689005	0.386957	0.274554	0.198995
	175.6	1.13818	0.662357	0.830222	0.103033	0.986894	0.0047169
	175.7	1.16796	0.51316	0.449339	1.03291	0.507444	0.85031
	175.8	0.35938	0.525908	1.17512	0.941838	0.0347909	0.128906
	175.9	0.0363161	0.804374	1.18655	0.610978	0.786373	0.0336667
	176	0.562268	0.104376	0.404587	0.759883	0.215198	1.04401
	176.1	0.320193	0.101222	0.219302	0.742759	0.588396	0.197638
	176.2	1.14284	0.039326	0.919413	0.357438	1.04264	0.651104
	176.3	1.01035	0.0892112	1.06544	0.624815	1.04529	0.190444
	176.4	0.978511	0.641016	0.231408	1.18766	0.0224382	0.115466
	176.5	0.952391	0.181281	0.19306	1.11225	0.978564	0.734191
	176.6	0.173149	0.199926	1.06076	0.23816	0.11575	0.72767
	176.7	0.61984	0.775407	0.764702	0.372729	0.898654	0.484323
	176.8	0.281793	0.726807	0.904774	0.390825	0.498773	1.0935
	176.9	1.17506	0.0944264	1.03817	0.916756	1.03395	0.741933
	177	0.530537	1.13395	0.980547	0.764399	0.728663	1.20041
	177.1	0.968151	1.16464	0.952649	0.329391	1.16348	1.07831
	177.2	0.602424	0.996602	0.956876	0.352933	0.710793	0.391707
	177.3	0.751426	0.443817	0.967652	0.227141	0.727551	0.391334
	177.4	0.097126	0.948743	1.00963	0.237091	0.242706	0.229972
	177.5	0.488514	0.549084	0.494915	1.12652	0.192959	0.756277
	177.6	0.305327	0.299956	0.22073	0.778945	1.15057	1.16441
	177.7	1.2042	0.905536	0.456936	0.758862	0.743303	1.17973
	177.8	0.928878	1.05855	0.172035	0.929106	1.0846	0.146823
	177.9	0.0326285	0.359889	1.16337	0.059764	0.771868	1.1909
	178	0.423769	0.222145	0.285028	0.790756	0.920737	0.446575
	178.1	0.0536729	0.46848	0.0354737	0.589855	0.022277	0.387358
	178.2	0.17497	0.57204	0.250477	0.0499796	0.340936	0.979992
	178.3	0.229423	0.587348	0.256551	0.995844	0.0734754	0.782272
	178.4	0.588629	0.833835	0.824397	0.596927	1.16724	0.418111
	178.5	0.828265	0.81642	0.668826	0.475819	0.311234	0.53651
	178.6	0.617129	0.632108	1.06855	0.539882	0.534227	0.285965
	178.7	0.853449	1.17147	0.462433	0.10258	0.258312	1.2024
	178.8	0.141407	1.13405	1.16263	0.521207	0.138196	0.4377
	178.9	0.399773	0.354486	0.985977	0.463639	0.964398	0.975054
	179	1.13932	0.398543	0.840205	0.998178	0.855961	0.628916
	179.1	0.923518	0.589435	1.13993	1.15448	0.0673167	0.730897
	179.2	0.873099	0.498331	1.0847	0.262886	0.625249	0.393713
	179.3	0.559677	0.31731	1.05211	0.115813	1.09955	0.0744885
	179.4	0.88526	1.20792	0.419528	0.9701	1.18329	0.904107
	179.5	0.946277	1.14669	0.94878	0.635983	0.332831	0.92895
	179.6	0.646997	0.577959	0.591769	1.0808	0.001988	0.31764
	179.7	0.814443	0.478152	0.258048	1.05883	0.585342	0.189962
	179.8	0.551779	0.906404	0.846396	0.890565	1.15237	0.646808
	179.9	0.837501	0.410792	1.12052	0.814488	0.676628	1.16112
	180	0.969023	0.0756301	0.323406	0.178614	0.748735	0.668731
	180.1	0.0986272	0.182149	0.149385	0.618064	0.756367	1.12529
	180.2	0.0595584	0.312103	0.578563	0.242069	0.352019	1.06667
	180.3	0.455229	0.738771	0.120317	0.214594	0.984384	1.16145
	180.4	0.27518	0.361756	1.04412	0.418489	0.506301	0.150832
	180.5	0.212374	1.01948	0.274575	0.0751622	0.190336	0.171622
	180.6	0.92838	0.214833	0.0669688	0.721467	0.41075	0.364707
	180.7	0.661532	0.670148	0.426534	0.689737	1.12424	0.997428
	180.8	0.744444	0.66622	0.777713	0.212395	1.15163	0.69524
	180.9	0.229321	0.346587	0.408509	0.911173	1.16638	0.740133
	181	0.624653	0.826208	0.244673	0.238773	0.0481777	0.384364
	181.1	0.805362	0.926815	0.91828	0.277556	0.718881	0.34943
	181.2	0.131138	0.249097	0.625459	0.825194	1.09992	0.437525
	181.3	1.06291	0.0591358	0.781226	0.197568	0.219567	1.05479
	181.4	0.728137	0.212317	0.425729	0.985816	0.358775	0.582791
	181.5	0.742654	0.563737	0.0501441	0.952593	0.207787	1.1306
	181.6	0.593659	1.14537	1.10915	0.192863	1.07428	0.343731
	181.7	0.317523	0.806931	0.798192	1.11086	0.396081	0.897341
	181.8	0.792735	0.464275	0.40578	1.12531	0.579308	0.765151
	181.9	0.381143	0.14602	0.349378	0.964777	0.0540006	0.857914
	182	0.994705	1.20802	0.0029663	0.51619	0.618804	0.078148
	182.1	0.7789	0.650219	0.887013	0.451995	0.857154	0.956997
	182.2	0.0243996	1.01347	1.0827	0.6039	0.0617452	1.20625
	182.3	0.743558	0.350126	1.11751	1.02645	0.288715	0.132541
	182.4	1.16742	0.622779	0.515157	0.367703	0.77306	0.0923996
	182.5	0.151281	0.687671	0.738356	0.0087668	0.316846	1.06123
	182.6	0.404956	0.836768	0.0253122	0.0196066	0.26789	0.052424
	182.7	0.499136	1.14232	0.225222	0.669597	0.0637646	0.809603
	182.8	0.053588	0.0524465	0.481568	0.998495	0.353218	1.0895
	182.9	0.55982	0.231653	0.798351	1.19807	0.544078	0.927856
	183	1.03466	0.796603	0.400618	0.780969	0.470206	0.527564
	183.1	1.18127	0.24729	0.754818	0.18348	0.346992	0.6103
	183.2	0.638856	0.114887	0.357647	0.395838	0.150737	0.154797
	183.3	0.0619237	0.371939	0.345714	0.162941	0.515963	0.361235
	183.4	1.05489	0.759717	0.665086	0.213503	0.41287	0.131644
	183.5	0.553836	1.13253	0.653387	0.455499	0.542539	1.17286
	183.6	1.00664	0.297378	1.04846	1.07611	1.05784	1.0626
	183.7	0.653629	1.2057	1.18048	1.13429	0.660236	0.13934
	183.8	0.567548	0.448197	0.889754	0.480022	0.271326	0.680434
	183.9	0.390737	0.266648	0.468058	0.25792	0.838332	1.1354
	184	1.15734	0.165175	0.361282	0.648038	0.0842112	0.518573
	184.1	0.92931	1.06802	0.738535	1.05708	0.823705	0.445399
	184.2	0.0008222	1.15159	1.12562	0.219072	0.609039	0.751124
	184.3	0.632871	0.112591	1.15369	0.221664	0.0488812	0.0408285
	184.4	0.690162	0.119776	0.923116	0.66927	0.0532646	0.56106
	184.5	0.60848	0.289989	0.610954	0.465577	0.111721	0.405699
	184.6	0.339129	0.928269	0.929681	0.853404	1.0125	0.307558
	184.7	1.18205	1.093	0.774182	1.10988	0.257169	0.967395
	184.8	0.0957374	0.43751	0.293901	0.497198	0.20532	1.04071
	184.9	0.011795	0.47148	1.17428	0.504182	0.788615	0.557691
	185	1.05374	1.10451	1.02525	0.962865	0.807745	0.75281
	185.1	0.594674	0.0793577	0.141777	0.262176	0.0025994	0.87338
	185.2	0.420266	0.180096	0.962433	0.411812	0.543001	0.994574
	185.3	0.96867	0.928666	0.16772	0.606407	0.464306	0.127176
	185.4	0.532261	0.675624	0.0831992	0.541453	0.838535	0.983998
	185.5	0.173222	0.949885	0.635752	0.892114	0.562431	1.16345
	185.6	0.572294	1.03944	0.526606	0.89632	0.0831931	0.446057
	185.7	0.373133	1.0179	0.0099611	0.670152	0.681972	0.325607
	185.8	0.54718	0.201202	0.0832037	0.421684	0.485036	0.701493
	185.9	0.231113	0.155776	1.0673	0.825031	0.720378	0.992281
	186	1.12181	0.0533443	0.429541	1.04008	0.955191	0.283122
	186.1	0.546922	0.789826	0.548482	0.610415	0.558387	0.407754
	186.2	0.349634	0.963987	0.29056	0.730727	1.07109	1.1264
	186.3	0.0671231	0.964486	0.788659	0.978147	0.532199	1.09885
	186.4	0.402547	0.693132	0.758926	0.887135	0.843895	0.446137
	186.5	0.478898	1.17442	0.984183	0.900203	0.666057	0.539319
	186.6	0.244027	1.0438	0.571678	1.09181	0.0820005	0.78913
	186.7	0.312239	0.055361	0.0553547	0.350123	0.197313	0.519384
	186.8	0.689353	0.164799	1.15374	0.460144	0.989356	0.675807
	186.9	1.06502	0.710721	1.01252	0.319101	0.148668	1.03642
	187	0.670256	0.345881	0.776841	1.02659	0.771349	1.03796
	187.1	0.857915	0.9785	0.902483	1.17182	0.346313	0.155556
	187.2	0.932627	0.894294	0.371311	0.813707	0.459186	0.0484262
	187.3	0.633769	0.0150549	0.190893	0.613669	0.389958	0.737757
	187.4	0.497138	0.375651	0.698311	0.0902623	1.17224	1.20757
	187.5	1.12579	0.13739	1.15884	0.709663	0.876545	0.710764
	187.6	0.566829	0.716698	0.673073	0.778803	0.761681	0.0860792
	187.7	0.288563	0.280063	0.545364	1.11841	0.117107	0.555498
	187.8	0.977606	0.952721	1.19185	1.03409	0.398482	1.19474
	187.9	1.00441	0.234057	0.285855	0.398293	1.15938	1.02569
	188	0.618748	0.0932072	0.514226	0.257914	0.187766	1.06138
	188.1	0.489682	0.948801	0.373706	0.562208	1.10429	0.683816
	188.2	0.232405	0.680782	0.798337	0.273358	0.486398	0.252466
	188.3	1.18877	0.996435	0.794499	0.906504	0.0283184	0.83138
	188.4	0.487649	1.11484	0.138648	0.620824	0.21849	0.416932
	188.5	0.238613	0.965498	0.749307	1.12402	0.252018	0.906016
	188.6	1.1359	0.466049	0.946328	0.762424	0.138309	0.32108
	188.7	0.604123	0.605277	0.576311	0.655033	0.937213	0.80686
	188.8	0.478875	0.820558	0.545891	1.01464	0.900948	0.413594
	188.9	0.173918	1.18244	0.127456	1.02889	0.154143	0.767357
	189	0.741025	0.64417	0.543818	0.899178	0.581428	0.991961
	189.1	0.81175	1.04796	0.0434835	0.2976	0.866802	0.370265
	189.2	0.517932	0.158583	0.270702	0.876853	0.675369	1.09529
	189.3	1.00959	0.788991	0.394161	0.0540969	0.314533	0.0685157
	189.4	0.126331	0.488517	1.01361	0.39834	0.720064	0.511596
	189.5	0.687071	0.736384	0.877819	0.563043	0.373144	0.644964
	189.6	0.340185	0.03963	0.0279842	0.125771	0.707272	1.01225
	189.7	1.09522	0.515515	1.12393	1.00468	0.890179	0.5286
	189.8	0.118455	0.321211	0.674322	0.906269	0.200534	1.13735
	189.9	0.0289086	0.223337	0.787102	0.417083	0.941603	1.16591
	190	1.16273	0.232233	0.639876	1.17812	0.128322	0.0607561
	190.1	0.366503	1.19874	1.04773	0.95071	1.12342	1.14396
	190.2	0.722801	0.0033674	0.0830095	0.435935	0.859003	0.751885
	190.3	0.339826	0.559275	1.04417	0.102095	0.16391	0.737631
	190.4	0.593921	0.0603565	0.740713	1.15295	1.14018	0.0649526
	190.5	0.698368	1.07381	0.47358	0.883813	1.05804	0.173295
	190.6	0.423838	0.832749	0.308117	0.118708	0.494601	0.671208
	190.7	0.981451	0.0144349	0.810133	0.532666	0.0244493	0.500966
	190.8	1.06591	1.09054	1.06478	0.783134	0.472724	0.781676
	190.9	1.12465	0.999114	0.0193782	0.692112	1.11204	0.565768
	191	0.446308	0.666573	0.715943	0.511926	1.01839	0.303625
	191.1	0.777456	0.424512	0.538925	0.225198	0.176281	0.796525
	191.2	0.493211	1.00299	0.670439	0.240732	0.380111	1.06411
	191.3	0.963616	0.964326	1.04508	0.407756	0.0525889	0.95375
	191.4	0.0760529	0.792198	1.184	0.207522	0.437265	1.16371
	191.5	0.12283	0.168093	0.786526	0.868295	0.791691	0.875336
	191.6	1.00985	0.912765	0.528349	0.967338	0.321517	0.295144
	191.7	0.140515	0.137289	0.468358	1.10262	0.730571	1.06075
	191.8	0.87425	0.796436	0.547752	0.674822	0.510475	0.311561
	191.9	0.875713	0.18154	0.0612518	0.734073	0.985378	0.620811
	192	0.678811	0.033321	1.03328	0.701464	0.32637	0.865333
	192.1	0.767733	0.343448	0.912728	0.78541	0.690968	0.308417
	192.2	0.102364	1.11907	1.20454	0.557155	1.12683	0.205188
	192.3	0.389894	0.875344	0.920052	0.431931	0.846027	0.748402
	192.4	0.461364	0.236176	1.11308	0.39734	0.833681	0.712251
	192.5	0.203508	1.04373	0.0809676	0.446322	1.20475	0.574227
	192.6	0.108744	0.306207	0.261741	0.200869	0.301499	0.882012
	192.7	0.907184	1.13025	0.183036	0.602179	0.0073535	0.505843
	192.8	0.405773	1.14835	0.614433	0.646128	0.324231	0.039176
	192.9	1.17232	0.293538	0.5756	0.750427	0.286131	0.659291
	193	0.0228105	1.17691	0.582615	0.989662	0.550018	0.957682
	193.1	0.766848	0.269813	0.949025	0.0092044	0.931837	0.0091066
	193.2	0.452825	0.602098	0.958732	0.474479	0.902734	1.05172
	193.3	0.791351	1.1262	0.730343	0.728273	0.122434	1.02711
	193.4	0.618938	0.623502	0.999767	0.0275634	1.09321	0.638111
	193.5	0.30834	0.639877	0.678649	0.347801	0.0633062	0.541457
	193.6	0.227114	0.296984	1.20422	0.955431	0.246479	0.73926
	193.7	0.82577	0.456421	1.13271	0.780246	0.585397	0.571682
	193.8	0.736708	0.532765	0.89197	0.732758	0.524403	0.654982
	193.9	0.106768	0.10232	0.0719846	0.666827	0.381738	0.976921
	194	0.279814	1.11408	0.669631	0.825397	1.14736	1.07126
	194.1	0.638418	0.0529949	0.886587	1.18774	0.899564	0.65583
	194.2	1.11048	0.437511	1.00607	0.336398	0.512146	0.768681
	194.3	0.319075	0.161477	0.0539085	0.561022	0.404242	0.764683
	194.4	0.821709	0.36033	0.713387	0.582896	0.382236	0.224719
	194.5	0.772468	0.844779	0.890742	0.0474093	0.244732	0.676739
	194.6	1.06909	0.55831	0.811757	0.427581	0.545001	0.992062
	194.7	0.373009	0.507254	1.01457	0.548135	1.04846	1.1862
	194.8	0.921311	0.0798884	0.366729	0.91202	1.05672	0.925525
	194.9	1.13814	0.279495	0.928625	0.518472	0.612783	0.0488272
	195	0.777633	0.860245	1.19817	0.280249	0.808303	0.212691
	195.1	0.796088	0.627012	0.566255	0.247537	0.765084	0.405643
	195.2	0.682127	0.303135	0.360196	0.723823	0.865445	0.423515
	195.3	0.786967	0.184219	0.520777	0.489851	1.14425	0.886753
	195.4	0.49676	0.929164	1.07073	0.937576	0.194582	0.341711
	195.5	0.753492	0.554192	0.0611239	1.20398	0.30048	0.36671
	195.6	0.89166	0.229095	0.687311	0.32996	0.215587	0.843079
	195.7	0.529636	1.08023	0.136263	1.01838	0.252353	0.574578
	195.8	0.879673	0.287748	0.0762426	0.0677064	0.485634	0.756924
	195.9	0.53752	0.352452	0.774397	0.817781	1.12678	0.559378
	196	0.320467	1.15898	0.0005781	0.313274	0.0110216	0.0456168
	196.1	1.08686	0.684429	0.355855	1.09268	0.525818	0.778988
	196.2	0.516887	0.361212	0.343992	0.844533	0.472625	0.0383726
	196.3	0.397368	0.55325	0.310347	0.224483	0.328139	0.198197
	196.4	0.705343	1.13334	0.915636	0.258949	1.06518	1.15843
	196.5	0.474491	0.163343	0.0324447	0.8915	0.859046	0.409855
	196.6	0.0664179	0.576175	0.0465265	0.883264	0.289441	0.104942
	196.7	0.826974	0.918864	1.20446	0.823659	0.0598654	1.17666
	196.8	0.104003	0.125068	0.650294	0.0907127	0.655935	0.369254
	196.9	0.74433	1.16175	0.616718	0.155332	1.1481	0.517606
	197	0.0624615	0.479752	0.0480988	0.938571	0.130999	0.146428
	197.1	0.437939	0.611266	0.622841	0.302644	0.658879	0.0751574
	197.2	0.433019	0.935999	0.456279	0.131041	1.20511	0.410214
	197.3	0.703726	0.831912	0.19001	1.14659	0.161752	0.652487
	197.4	0.414446	0.256979	0.789867	0.640539	0.374015	1.13372
	197.5	0.0528232	0.892022	0.978292	0.800688	0.57629	0.359371
	197.6	0.763359	0.522763	0.805385	0.428557	1.18401	0.130038
	197.7	0.827482	0.35219	0.0890384	0.525642	0.84589	0.471339
	197.8	0.60963	0.37946	0.17046	0.0349803	0.997574	0.454656
	197.9	0.296886	0.0341302	0.578057	1.13969	0.0792572	0.226536
	198	0.367179	0.589312	1.04245	1.14876	0.618828	0.981445
	198.1	0.986192	1.11529	0.16738	0.529075	1.16502	0.801397
	198.2	0.414724	0.613445	1.11961	0.780753	0.39313	0.0541872
	198.3	1.19516	0.0864403	1.10447	0.679841	1.16486	0.193391
	198.4	0.753185	0.0985595	0.939902	0.0604505	0.132547	1.03228
	198.5	0.501519	0.989308	0.421968	0.793834	0.644316	0.446963
	198.6	1.03933	1.07787	0.87025	0.105609	0.38433	0.89773
	198.7	1.16026	0.888491	0.453798	0.465677	0.769323	0.278585
	198.8	0.500613	0.968723	0.666777	0.81155	0.422741	1.16983
	198.9	0.950145	0.315289	0.49583	1.19539	0.890749	0.127009
	199	0.915987	1.12136	1.19485	0.238163	0.146872	0.43082
	199.1	0.843627	1.1284	1.05476	0.71819	0.379263	0.0583416
	199.2	0.569324	0.913909	0.0765259	1.01706	1.02498	0.996043
	199.3	0.0011546	0.408488	0.597839	0.453584	0.182293	0.142378
	199.4	1.00177	0.213769	0.713038	0.962405	0.684919	0.412191
	199.5	0.70585	1.10562	0.833534	0.440258	0.156447	0.927096
	199.6	0.712262	0.323918	0.721471	0.594404	0.897181	0.0762426
	199.7	0.119168	1.16053	0.224544	1.00343	0.136925	0.825811
	199.8	0.15999	0.593064	1.04462	0.353305	0.270729	0.900193
[truncated: 2 more rows]

## Sheet: Figure 5a
N/P Proportion	DNN	rDNN	KmDNN		Raw data	N	N	N	N	N	N	N	N	N	N	N	N	N	N	N
1	0.86	0.88	0.87			N	N	N	N	N	N	N	N	N	N	N	N	N	N	N
2	0.78	0.8	0.79			P	P	P	P	P	P	P	P	P	P	P	P	P	P	P
3	0.82	0.84	0.82			N	N	N	N	N	N	N	N	N	N	N	N	N	N	N
4	0.83	0.84	0.82			N	N	N	N	N	N	N	N	N	N	N	N	N	N	N
5	0.81	0.83	0.8			N	N	N	N	N	N	N	N	N	N	N	N	N	N	N
						N	N	N	N	N	N	N	N	N	N	N	N	N	N	N
						N	N	N	N	N	N	N	N	N	N	N	N	N	N	N
						N	N	N	N	N	N	N	N	N	N	N	N	N	N	N
						N	N	N	N	N	N	N	N	N	N	N	N	N	N	N
						N	N	N	N	N	N	N	N	N	N	N	N	N	N	N
						N	N	N	N	N	N	N	N	N	N	N	N	N	N	N
						N	N	N	N	N	N	N	N	N	N	N	N	N	N	N
						N	N	N	N	N	N	N	N	N	N	N	N	N	N	N
						N	N	N	P	P	P	N	N	P	N	N	N	P	N	P
						P	P	P	P	P	P	P	P	P	P	P	P	P	P	P
						N	N	N	N	N	N	N	N	N	N	N	N	N	N	N
						P	P	P	P	P	P	P	P	P	P	P	P	P	P	P
						N	N	N	N	N	N	N	N	N	N	N	N	N	N	N
						N	N	N	N	N	N	N	N	N	N	N	N	N	N	N
						N	N	N	N	N	N	N	N	N	N	N	N	N	N	N
						N	N	N	N	N	N	N	N	N	N	N	N	N	N	N
						N	N	N	P	P	P	P	P	P	P	P	P	P	P	P
						N	N	N	N	N	N	N	N	N	N	N	N	N	N	N
						N	N	N	N	N	N	N	N	N	N	N	N	N	N	N
						N	N	N	N	N	N	N	N	N	N	N	N	N	N	N
						N	N	N	N	N	N	N	N	N	N	N	N	N	N	N
						P	P	P	P	P	P	P	P	P	P	P	P	P	P	P
						N	N	N	N	N	N	N	N	N	N	N	N	N	N	N
						N	N	N	N	N	N	N	N	N	N	N	N	N	N	N
						N	N	N	N	N	N	N	N	N	N	N	N	N	N	N
						N	N	N	N	N	N	N	N	N	N	N	N	N	N	N
						N	N	N	N	N	N	N	N	N	N	N	N	N	N	N
						N	N	N	N	N	N	N	N	N	N	N	N	N	N	N
						N	N	N	N	N	N	N	N	N	N	N	N	N	N	N
						N	N	N	N	N	N	N	N	N	N	N	N	N	N	N
						N	N	N	N	N	N	N	N	N	N	N	N	N	N	N
						N	N	N	N	N	N	N	N	N	N	N	N	N	N	N
						N	N	N	N	N	N	N	N	N	N	N	N	N	N	N
						N	N	N	N	N	N	N	N	N	N	N	N	N	N	N
						N	N	N	N	N	N	N	N	N	N	N	N	N	N	N
						N	N	N	N	N	N	N	N	N	N	N	N	N	N	N
						N	N	N	N	N	N	N	N	N	N	N	N	N	N	N
						P	P	P	P	P	P	P	P	P	P	P	P	P	P	P
						N	N	N	N	N	N	N	N	N	N	N	N	N	N	N
						N	N	N	N	N	N	N	N	N	N	N	N	N	N	N
						N	N	N	N	N	N	N	N	N	N	N	N	N	N	N
						P	P	P	P	P	P	P	P	P	P	P	P	P	P	P
						N	N	N	N	N	N	N	N	N	N	N	N	N	N	N
						P	P	P	P	P	P	P	P	P	P	P	P	P	P	P
						N	N	N	N	N	N	N	N	N	N	N	N	N	N	N
						N	N	N	N	N	N	N	N	N	N	N	N	N	N	N
						N	N	N	N	N	N	N	N	N	N	N	N	N	N	N
						P	P	P	P	P	P	P	P	P	P	P	P	P	P	P
						N	N	N	N	N	N	N	N	N	N	N	N	N	N	N
						N	N	N	N	N	N	N	N	N	N	N	N	N	N	N
						N	N	N	N	N	N	N	N	N	N	N	N	N	N	N
						N	N	N	N	N	N	N	N	N	N	N	N	N	N	N
						N	N	N	N	N	N	N	N	N	N	N	N	N	N	N
						P	N	P	P	P	P	P	P	P	P	P	P	P	P	P
						P	P	P	P	P	P	P	P	P	P	P	P	P	P	P
						N	N	N	N	N	N	N	N	N	N	N	N	N	N	N
						N	N	N	N	N	N	N	N	N	N	N	N	N	N	N
						N	N	N	N	N	N	N	N	N	N	N	N	N	N	N
						N	N	N	N	N	N	N	N	N	N	N	N	N	N	N
						N	N	N	N	N	N	N	N	N	N	N	N	N	N	N
						N	N	N	N	N	N	N	N	N	N	N	N	N	N	N
						N	N	N	N	N	N	N	N	N	N	N	N	N	N	N
						N	N	N	P	P	P	P	N	P	N	N	P	P	N	P
						N	N	N	N	N	N	N	N	N	N	N	N	N	N	N
						N	N	N	N	N	N	N	N	N	N	N	N	N	N	N
						N	N	N	N	N	N	N	N	N	N	N	N	N	N	N
						N	N	N	N	N	N	N	N	N	N	N	N	N	N	N
						N	N	N	N	N	N	N	N	N	N	N	N	N	N	N
						P	P	P	P	P	P	P	P	P	P	P	P	P	P	P
						P	P	P	P	P	P	P	P	P	P	P	P	P	P	P
						P	N	P	P	P	P	P	P	P	P	P	P	P	P	P
						N	N	N	N	N	N	N	N	N	N	N	N	N	N	N
						N	N	N	N	N	N	N	N	N	N	N	N	N	N	N
						N	N	N	N	N	N	N	N	N	N	N	N	N	N	N
						P	P	P	P	P	P	P	P	P	P	P	P	P	P	P
						N	N	N	N	N	N	N	N	N	N	N	N	N	N	N
						N	N	N	N	N	N	N	N	N	N	N	N	N	N	N
						N	N	N	N	N	N	N	N	N	N	N	N	N	N	N
						N	N	N	N	N	N	N	N	N	N	N	N	N	N	N
						N	N	N	P	N	P	N	N	P	N	N	N	N	N	N
						N	N	N	N	N	N	N	N	N	N	N	N	N	N	N
						N	N	N	P	P	P	N	N	P	N	N	N	N	N	P
						N	N	N	P	P	P	P	P	P	P	P	P	P	P	P
						N	N	N	P	N	N	N	N	N	N	N	N	N	N	N
						N	N	N	N	N	N	N	N	N	N	N	N	N	N	N
						N	N	N	N	N	N	N	N	N	N	N	N	N	N	N
						N	N	N	P	N	P	N	N	P	N	N	N	N	N	N
						N	N	N	N	N	N	N	N	N	N	N	N	N	N	N
						N	N	N	N	N	N	N	N	N	N	N	N	N	N	N
						N	N	N	N	N	N	N	N	N	N	N	N	N	N	N
						N	N	N	N	N	N	N	N	N	N	N	N	N	N	N
						N	N	N	N	N	N	N	N	N	N	N	N	N	N	N
						N	N	N	N	N	N	N	N	N	N	N	N	N	N	N
						N	N	N	N	N	N	N	N	N	N	N	N	N	N	N
						N	N	N	N	N	N	N	N	N	N	N	N	N	N	N
						N	N	N	N	N	N	N	N	N	N	N	N	N	N	N
						N	N	N	N	N	N	N	N	N	N	N	N	N	N	N
						N	N	N	N	N	N	N	N	N	N	N	N	N	N	N
						N	N	N	P	P	P	P	P	P	P	P	P	P	P	P
						N	N	N	N	N	N	N	N	N	N	N	N	N	N	N
						N	N	N	N	N	N	N	N	N	N	N	N	N	N	N
						N	N	N	N	N	N	N	N	N	N	N	N	N	N	N
						N	N	N	N	N	N	N	N	N	N	N	N	N	N	N
						N	N	N	N	N	N	N	N	N	N	N	N	N	N	N
						P	P	P	P	P	P	P	P	P	P	P	P	P	P	P
						N	N	N	N	N	N	N	N	N	N	N	N	N	N	N
						N	N	N	N	N	N	N	N	N	N	N	N	N	N	N
						N	N	N	N	N	N	N	N	N	N	N	N	N	N	N
						N	N	N	P	N	N	N	N	P	N	N	N	N	N	N
						N	N	N	N	N	N	N	N	N	N	N	N	N	N	N
						N	N	N	N	N	N	N	N	N	N	N	N	N	N	N
						N	N	N	P	P	P	N	N	P	N	N	N	P	N	P
						N	N	N	N	N	N	N	N	N	N	N	N	N	N	N
						N	N	N	N	N	N	N	N	N	N	N	N	N	N	N
						N	N	N	N	N	N	N	N	N	N	N	N	N	N	N
						P	P	P	P	P	P	P	P	P	P	P	P	P	P	P
						P	N	N	P	P	P	P	P	P	P	P	P	P	P	P
						N	N	N	P	P	P	P	N	P	P	N	P	P	P	P
						N	N	N	N	N	N	N	N	N	N	N	N	N	N	N
						N	N	N	N	N	N	N	N	N	N	N	N	N	N	N
						N	N	N	N	N	N	N	N	N	N	N	N	N	N	N
						N	N	N	N	N	N	N	N	N	N	N	N	N	N	N
						N	N	N	N	N	N	N	N	N	N	N	N	N	N	N
						N	N	N	N	N	N	N	N	N	N	N	N	N	N	N
						P	P	P	P	P	P	P	P	P	P	P	P	P	P	P
						P	P	P	P	P	P	P	P	P	P	P	P	P	P	P
						N	N	N	N	N	N	N	N	N	N	N	N	N	N	N
						N	N	N	N	N	N	N	N	N	N	N	N	N	N	N
						P	P	P	P	P	P	P	P	P	P	P	P	P	P	P
						N	N	N	N	N	N	N	N	N	N	N	N	N	N	N
						N	N	N	N	N	N	N	N	N	N	N	N	N	N	N
						N	N	N	N	N	N	N	N	N	N	N	N	N	N	N
						N	N	N	N	N	N	N	N	N	N	N	N	N	N	N
						P	P	P	P	P	P	P	P	P	P	P	P	P	P	P
						N	N	N	N	N	N	N	N	N	N	N	N	N	N	N
						N	N	N	N	N	N	N	N	N	N	N	N	N	N	N
						N	N	N	P	P	P	P	N	P	N	N	P	P	N	P
						N	N	N	N	N	N	N	N	N	N	N	N	N	N	N
						P	P	P	P	P	P	P	P	P	P	P	P	P	P	P
						N	N	N	N	N	N	N	N	N	N	N	N	N	N	N
						N	N	N	N	N	N	N	N	N	N	N	N	N	N	N
						N	N	N	N	N	N	N	N	N	N	N	N	N	N	N
						N	N	N	N	N	N	N	N	N	N	N	N	N	N	N
						P	P	P	P	P	P	P	P	P	P	P	P	P	P	P
						N	N	N	N	N	N	N	N	N	N	N	N	N	N	N
						N	N	N	N	N	N	N	N	N	N	N	N	N	N	N
						N	N	N	N	N	N	N	N	N	N	N	N	N	N	N
						N	N	N	N	N	N	N	N	N	N	N	N	N	N	N
						N	N	N	N	N	N	N	N	N	N	N	N	N	N	N
						N	N	N	N	N	N	N	N	N	N	N	N	N	N	N
						N	N	N	N	N	N	N	N	N	N	N	N	N	N	N
						N	N	N	N	N	N	N	N	N	N	N	N	N	N	N
						N	N	N	N	N	N	N	N	N	N	N	N	N	N	N
						N	N	N	N	N	N	N	N	N	N	N	N	N	N	N
						N	N	N	N	N	N	N	N	N	N	N	N	N	N	N
						N	N	N	N	N	N	N	N	N	N	N	N	N	N	N
						N	N	N	N	N	N	N	N	N	N	N	N	N	N	N
						N	N	N	N	N	N	N	N	N	N	N	N	N	N	N
						N	N	N	N	N	N	N	N	N	N	N	N	N	N	N
						N	N	N	N	N	N	N	N	N	N	N	N	N	N	N
						N	N	N	P	P	P	P	N	P	P	N	P	P	P	P
						N	N	N	N	N	N	N	N	N	N	N	N	N	N	N
						N	N	N	N	N	N	N	N	N	N	N	N	N	N	N
						N	N	N	N	N	N	N	N	N	N	N	N	N	N	N
						N	N	N	N	N	N	N	N	N	N	N	N	N	N	N
						N	N	N	N	N	N	N	N	N	N	N	N	N	N	N
						N	N	N	N	N	N	N	N	N	N	N	N	N	N	N
						N	N	N	N	N	N	N	N	N	N	N	N	N	N	N
						P	P	P	P	P	P	P	P	P	P	P	P	P	P	P
						P	P	P	P	P	P	P	P	P	P	P	P	P	P	P
						N	N	N	N	N	N	N	N	N	N	N	N	N	N	N
						N	N	N	N	N	N	N	N	N	N	N	N	N	N	N
						N	N	N	N	N	N	N	N	N	N	N	N	N	N	N
						N	N	N	N	N	N	N	N	N	N	N	N	N	N	N
						N	N	N	N	N	N	N	N	N	N	N	N	N	N	N
						N	N	N	N	N	N	N	N	N	N	N	N	N	N	N
						N	N	N	N	N	N	N	N	N	N	N	N	N	N	N
						N	N	N	P	P	P	N	N	P	N	N	N	N	N	P
						N	N	N	N	N	N	N	N	N	N	N	N	N	N	N
						N	N	N	N	N	N	N	N	N	N	N	N	N	N	N
						N	N	N	N	N	N	N	N	N	N	N	N	N	N	N
						N	N	N	N	N	N	N	N	N	N	N	N	N	N	N
						N	N	N	N	N	N	N	N	N	N	N	N	N	N	N
						P	N	N	P	P	P	P	P	P	P	P	P	P	P	P
						N	N	N	N	N	N	N	N	N	N	N	N	N	N	N
						P	P	P	P	P	P	P	P	P	P	P	P	P	P	P
						N	N	N	N	N	N	N	N	N	N	N	N	N	N	N
						N	N	N	P	P	P	N	N	P	N	N	N	N	N	P
						N	N	N	N	N	N	N	N	N	N	N	N	N	N	N
						N	N	N	N	N	N	N	N	N	N	N	N	N	N	N
						N	N	N	N	N	N	N	N	N	N	N	N	N	N	N
						P	P	P	P	P	P	P	P	P	P	P	P	P	P	P
						N	N	N	N	N	N	N	N	N	N	N	N	N	N	N
						N	N	N	N	N	N	N	N	N	N	N	N	N	N	N
						P	P	P	P	P	P	P	P	P	P	P	P	P	P	P
						N	N	N	N	N	N	N	N	N	N	N	N	N	N	N
						P	P	P	P	P	P	P	P	P	P	P	P	P	P	P
						N	N	N	N	N	N	N	N	N	N	N	N	N	N	N
						N	N	N	N	N	N	N	N	N	N	N	N	N	N	N
						N	N	N	N	N	N	N	N	N	N	N	N	N	N	N
						N	N	N	N	N	N	N	N	N	N	N	N	N	N	N
						N	N	N	N	N	N	N	N	N	N	N	N	N	N	N
						N	N	N	N	N	N	N	N	N	N	N	N	N	N	N
						N	N	N	N	N	N	N	N	N	N	N	N	N	N	N
						N	N	N	P	P	P	P	P	P	P	P	P	P	P	P
						N	N	N	N	N	N	N	N	N	N	N	N	N	N	N
						N	N	N	N	N	N	N	N	N	N	N	N	N	N	N

## Sheet: Figure 5b
N/P Proportion	DNN	rDNN	KmDNN		Raw data	P	P	P	P	P	P	P	P	P	P	P	P	P	P	P
10	0.82	0.83	0.83			N	N	N	N	N	N	N	N	N	N	N	N	N	N	N
20	0.86	0.87	0.87			N	N	N	N	N	N	P	P	P	P	P	P	P	P	P
30	0.66	0.7	0.7			N	N	N	N	N	N	N	N	N	N	N	N	N	N	N
40	0.71	0.72	0.7			N	N	N	N	N	N	N	N	N	N	N	N	N	N	N
50	0.71	0.71	0.7			N	N	N	N	N	N	N	N	N	N	N	N	N	N	N
						N	N	N	N	N	N	N	N	N	N	N	N	N	N	N
						P	P	P	P	P	P	P	P	P	P	P	P	P	P	P
						N	N	N	N	N	N	N	N	N	N	N	N	N	N	N
						N	N	N	N	N	N	N	N	N	N	N	N	N	N	N
						N	N	N	N	N	N	P	P	P	P	P	P	P	P	P
						N	N	N	N	N	N	N	N	N	N	N	N	N	N	N
						N	N	N	N	N	N	N	N	N	N	N	N	N	N	N
						N	N	N	N	N	N	N	N	N	N	N	N	N	N	N
						N	N	N	N	N	N	N	N	N	N	N	N	N	N	N
						P	P	P	P	P	P	P	P	P	P	P	P	P	P	P
						N	N	N	N	N	N	N	N	N	N	N	N	N	N	N
						P	P	P	N	N	N	P	P	P	P	P	P	P	P	P
						N	N	N	N	N	N	N	N	N	N	N	N	N	N	N
						N	N	N	N	N	N	N	N	N	N	N	N	N	N	N
						N	N	N	N	N	N	P	P	P	P	P	P	P	P	P
						N	N	N	N	N	N	N	N	N	N	N	N	N	N	N
						N	N	N	N	N	N	P	P	P	P	N	P	P	P	P
						P	P	P	P	P	P	P	P	P	P	P	P	P	P	P
						N	N	N	N	N	N	N	N	N	N	N	N	N	N	N
						N	N	N	N	N	N	N	N	N	N	N	N	N	N	N
						N	N	N	N	N	N	N	N	N	N	N	N	N	N	N
						N	N	N	N	N	N	P	P	P	N	N	P	N	N	P
						N	N	N	N	N	N	N	N	N	N	N	N	N	N	N
						N	N	N	N	N	N	P	P	P	P	P	P	P	P	P
						P	P	P	P	P	P	P	P	P	P	P	P	P	P	P
						N	N	N	N	N	N	N	N	N	N	N	N	N	N	N
						N	N	N	N	N	N	N	N	N	N	N	N	N	N	N
						N	N	N	N	N	N	N	N	N	N	N	N	N	N	N
						P	P	P	P	P	P	P	P	P	P	P	P	P	P	P
						N	N	N	N	N	N	N	N	N	N	N	N	N	N	N
						N	N	N	N	N	N	N	N	N	N	N	N	N	N	N
						N	N	N	N	N	N	N	N	N	N	N	N	N	N	N
						N	N	N	N	N	N	P	P	P	P	P	P	P	P	P
						N	N	N	N	N	N	N	N	N	N	N	N	N	N	N
						N	N	N	N	N	N	N	N	N	N	N	N	N	N	N
						N	N	N	N	N	N	P	N	N	N	N	N	N	N	N
						N	N	N	N	N	N	N	N	N	N	N	N	N	N	N
						N	N	N	N	N	N	P	P	P	P	P	P	P	P	P
						P	P	P	P	P	P	P	P	P	P	P	P	P	P	P
						N	N	N	N	N	N	N	N	N	N	N	N	N	N	N
						N	N	N	N	N	N	N	N	N	N	N	N	N	N	N
						P	P	P	N	N	N	P	P	P	P	P	P	P	P	P
						N	N	N	N	N	N	N	N	N	N	N	N	N	N	N
						N	N	N	N	N	N	N	N	N	N	N	N	N	N	N
						N	N	N	N	N	N	P	P	P	P	P	P	P	P	P
						N	N	N	N	N	N	N	N	N	N	N	N	N	N	N
						N	N	N	N	N	N	N	N	N	N	N	N	N	N	N
						P	P	P	N	N	N	P	P	P	P	P	P	P	P	P
						N	N	N	N	N	N	N	N	N	N	N	N	N	N	N
						N	N	N	N	N	N	N	N	N	N	N	N	N	N	N
						P	P	P	P	P	P	P	P	P	P	P	P	P	P	P
						N	N	N	N	N	N	N	N	N	N	N	N	N	N	N
						P	P	P	P	N	N	P	P	P	P	P	P	P	P	P
						N	N	N	N	N	N	N	N	N	N	N	N	N	N	N
						N	N	N	N	N	N	P	P	P	P	P	P	P	P	P
						N	N	N	N	N	N	N	N	N	N	N	N	N	N	N
						N	N	N	N	N	N	N	N	N	N	N	N	N	N	N
						N	N	N	N	N	N	P	P	P	P	P	P	P	P	P
						N	N	N	N	N	N	N	N	N	N	N	N	N	N	N
						N	N	N	N	N	N	P	P	P	P	N	P	P	P	P
						N	N	N	N	N	N	N	N	N	N	N	N	N	N	N
						N	N	N	N	N	N	N	N	N	N	N	N	N	N	N
						N	N	N	N	N	N	N	N	N	N	N	N	N	N	N
						N	N	N	N	N	N	N	N	N	N	N	N	N	N	N
						P	P	P	N	N	N	P	P	P	P	P	P	P	P	P
						N	N	N	N	N	N	N	N	N	N	N	N	N	N	N
						P	P	P	P	P	P	P	P	P	P	P	P	P	P	P
						N	N	N	N	N	N	N	N	N	N	N	N	N	N	N
						N	N	N	N	N	N	N	N	N	N	N	N	N	N	N
						N	N	N	N	N	N	P	P	P	P	P	P	P	P	P
						N	N	N	N	N	N	N	N	N	N	N	N	N	N	N
						P	P	P	P	P	P	P	P	P	P	P	P	P	P	P
						N	N	N	N	N	N	P	P	P	P	P	P	P	P	P
						N	N	N	N	N	N	N	N	N	N	N	N	N	N	N
						N	N	N	N	N	N	N	N	N	N	N	N	N	N	N
						P	N	N	N	N	N	P	P	P	P	P	P	P	P	P
						N	N	N	N	N	N	P	P	P	P	P	P	P	P	P
						N	N	N	N	N	N	N	N	N	N	N	N	N	N	N
						N	N	N	N	N	N	P	P	P	P	P	P	P	P	P
						P	P	P	P	P	P	P	P	P	P	P	P	P	P	P
						N	N	N	N	N	N	N	N	N	N	N	N	N	N	N
						N	N	N	N	N	N	N	N	N	N	N	N	N	N	N
						N	N	N	N	N	N	N	N	N	N	N	N	N	N	N
						N	N	N	N	N	N	N	N	N	N	N	N	N	N	N
						N	N	N	N	N	N	N	N	N	N	N	N	N	N	N
						N	N	N	N	N	N	N	N	N	N	N	N	N	N	N
						N	N	N	N	N	N	N	N	N	N	N	N	N	N	N
						N	N	N	N	N	N	N	N	N	N	N	N	N	N	N
						N	N	N	N	N	N	P	P	P	P	P	P	P	P	P
						N	N	N	N	N	N	N	N	N	N	N	N	N	N	N
						N	N	N	N	N	N	P	P	P	P	P	P	P	P	P
						N	N	N	N	N	N	N	N	N	N	N	N	N	N	N
						N	N	N	N	N	N	N	N	N	N	N	N	N	N	N
						N	N	N	N	N	N	N	N	N	N	N	N	N	N	N
						N	N	N	N	N	N	N	N	N	N	N	N	N	N	N
						N	N	N	N	N	N	N	N	N	N	N	N	N	N	N
						N	N	N	N	N	N	N	N	N	N	N	N	N	N	N
						N	N	N	N	N	N	N	N	N	N	N	N	N	N	N
						P	N	N	N	N	N	P	P	P	P	P	P	P	P	P
						N	N	N	N	N	N	N	N	N	N	N	N	N	N	N
						N	N	N	N	N	N	N	N	N	N	N	N	N	N	N
						N	N	N	N	N	N	N	N	N	N	N	N	N	N	N
						N	N	N	N	N	N	N	N	N	N	N	N	N	N	N
						N	N	N	N	N	N	N	N	N	N	N	N	N	N	N
						N	N	N	N	N	N	N	N	N	N	N	N	N	N	N
						N	N	N	N	N	N	P	P	P	P	P	P	P	P	P
						N	N	N	N	N	N	N	N	N	N	N	N	N	N	N
						N	N	N	N	N	N	N	N	N	N	N	N	N	N	N
						N	N	N	N	N	N	N	N	N	N	N	N	N	N	N
						P	P	P	P	P	P	P	P	P	P	P	P	P	P	P
						N	N	N	N	N	N	N	N	N	N	N	N	N	N	N
						P	P	P	P	P	P	P	P	P	P	P	P	P	P	P
						P	P	P	P	P	P	P	P	P	P	P	P	P	P	P
						N	N	N	N	N	N	N	N	N	N	N	N	N	N	N
						N	N	N	N	N	N	P	N	N	N	N	N	N	N	N
						N	N	N	N	N	N	N	N	N	N	N	N	N	N	N
						P	P	P	P	P	P	P	P	P	P	P	P	P	P	P
						P	P	P	N	N	N	P	P	P	P	P	P	P	P	P
						N	N	N	N	N	N	N	N	N	N	N	N	N	N	N
						N	N	N	N	N	N	N	N	N	N	N	N	N	N	N
						N	N	N	N	N	N	N	N	N	N	N	N	N	N	N
						N	N	N	N	N	N	P	N	N	N	N	N	N	N	N
						N	N	N	N	N	N	N	N	N	N	N	N	N	N	N
						N	N	N	N	N	N	N	N	N	N	N	N	N	N	N
						N	N	N	N	N	N	N	N	N	N	N	N	N	N	N
						N	N	N	N	N	N	N	N	N	N	N	N	N	N	N
						N	N	N	N	N	N	N	N	N	N	N	N	N	N	N
						N	N	N	N	N	N	N	N	N	N	N	N	N	N	N
						N	N	N	N	N	N	N	N	N	N	N	N	N	N	N
						N	N	N	N	N	N	N	N	N	N	N	N	N	N	N
						N	N	N	N	N	N	N	N	N	N	N	N	N	N	N
						N	N	N	N	N	N	P	N	N	N	N	N	N	N	N
						P	P	P	P	P	P	P	P	P	P	P	P	P	P	P
						N	N	N	N	N	N	N	N	N	N	N	N	N	N	N
						N	N	N	N	N	N	N	N	N	N	N	N	N	N	N
						N	N	N	N	N	N	N	N	N	N	N	N	N	N	N
						N	N	N	N	N	N	N	N	N	N	N	N	N	N	N
						N	N	N	N	N	N	N	N	N	N	N	N	N	N	N
						N	N	N	N	N	N	N	N	N	N	N	N	N	N	N
						N	N	N	N	N	N	N	N	N	N	N	N	N	N	N
						N	N	N	N	N	N	N	N	N	N	N	N	N	N	N
						N	N	N	N	N	N	N	N	N	N	N	N	N	N	N
						P	P	P	P	P	P	P	P	P	P	P	P	P	P	P
						N	N	N	N	N	N	N	N	N	N	N	N	N	N	N
						N	N	N	N	N	N	N	N	N	N	N	N	N	N	N
						N	N	N	N	N	N	N	N	N	N	N	N	N	N	N
						N	N	N	N	N	N	P	N	N	N	N	N	N	N	N
						N	N	N	N	N	N	N	N	N	N	N	N	N	N	N
						P	P	P	P	P	P	P	P	P	P	P	P	P	P	P
						N	N	N	N	N	N	N	N	N	N	N	N	N	N	N
						P	P	P	P	P	P	P	P	P	P	P	P	P	P	P
						N	N	N	N	N	N	N	N	N	N	N	N	N	N	N
						N	N	N	N	N	N	N	N	N	N	N	N	N	N	N
						N	N	N	N	N	N	N	N	N	N	N	N	N	N	N
						N	N	N	N	N	N	N	N	N	N	N	N	N	N	N
						N	N	N	N	N	N	N	N	N	N	N	N	N	N	N
						N	N	N	N	N	N	N	N	N	N	N	N	N	N	N
						N	N	N	N	N	N	N	N	N	N	N	N	N	N	N
						N	N	N	N	N	N	P	N	N	N	N	N	N	N	N
						N	N	N	N	N	N	N	N	N	N	N	N	N	N	N
						N	N	N	N	N	N	N	N	N	N	N	N	N	N	N
						N	N	N	N	N	N	N	N	N	N	N	N	N	N	N
						P	P	P	P	P	P	P	P	P	P	P	P	P	P	P
						N	N	N	N	N	N	N	N	N	N	N	N	N	N	N
						P	P	P	P	P	P	P	P	P	P	P	P	P	P	P
						N	N	N	N	N	N	P	P	P	N	N	P	N	N	P
						N	N	N	N	N	N	P	P	P	P	P	P	P	P	P
						P	P	P	P	P	P	P	P	P	P	P	P	P	P	P
						N	N	N	N	N	N	N	N	N	N	N	N	N	N	N
						N	N	N	N	N	N	P	P	P	P	P	P	P	P	P
						N	N	N	N	N	N	N	N	N	N	N	N	N	N	N
						N	N	N	N	N	N	N	N	N	N	N	N	N	N	N
						N	N	N	N	N	N	P	P	P	P	P	P	P	P	P
						P	P	P	P	P	P	P	P	P	P	P	P	P	P	P
						N	N	N	N	N	N	N	N	N	N	N	N	N	N	N
						N	N	N	N	N	N	P	N	N	N	N	N	N	N	N
						N	N	N	N	N	N	N	N	N	N	N	N	N	N	N
						N	N	N	N	N	N	N	N	N	N	N	N	N	N	N
						N	N	N	N	N	N	N	N	N	N	N	N	N	N	N
						N	N	N	N	N	N	N	N	N	N	N	N	N	N	N
						N	N	N	N	N	N	N	N	N	N	N	N	N	N	N
						N	N	N	N	N	N	N	N	N	N	N	N	N	N	N
						N	N	N	N	N	N	N	N	N	N	N	N	N	N	N
						P	P	P	P	P	P	P	P	P	P	P	P	P	P	P
						N	N	N	N	N	N	N	N	N	N	N	N	N	N	N
						N	N	N	N	N	N	N	N	N	N	N	N	N	N	N
						N	N	N	N	N	N	N	N	N	N	N	N	N	N	N
						N	N	N	N	N	N	N	N	N	N	N	N	N	N	N
						P	P	P	N	N	N	P	P	P	P	P	P	P	P	P
						N	N	N	N	N	N	N	N	N	N	N	N	N	N	N
						N	N	N	N	N	N	N	N	N	N	N	N	N	N	N
						P	P	P	P	N	N	P	P	P	P	P	P	P	P	P
						N	N	N	N	N	N	N	N	N	N	N	N	N	N	N
						N	N	N	N	N	N	P	P	P	P	P	P	P	P	P
						N	N	N	N	N	N	N	N	N	N	N	N	N	N	N
						N	N	N	N	N	N	N	N	N	N	N	N	N	N	N
						N	N	N	N	N	N	N	N	N	N	N	N	N	N	N
						N	N	N	N	N	N	N	N	N	N	N	N	N	N	N
						N	N	N	N	N	N	N	N	N	N	N	N	N	N	N
						P	P	P	P	P	P	P	P	P	P	P	P	P	P	P
						N	N	N	N	N	N	N	N	N	N	N	N	N	N	N
						N	N	N	N	N	N	P	N	N	N	N	N	N	N	N
						N	N	N	N	N	N	P	P	P	P	P	P	P	P	P
						P	P	P	P	P	P	P	P	P	P	P	P	P	P	P
						N	N	N	N	N	N	P	P	P	P	P	P	P	P	P
						P	P	P	P	P	P	P	P	P	P	P	P	P	P	P
						P	P	P	P	P	P	P	P	P	P	P	P	P	P	P

## Sheet: Figure 6
AUC	1-Layer	2-Layer	3-Layer	4-Layer	5-Layer	6-Layer		Raw data	b	b	b	b	b	b	b	b	b	b	b	b
Relus	0.65	0.74	0.78	0.7	0.6	0.59			a	a	a	a	b	b	b	b	b	b	b	b
Sigmoid	0.45	0.48	0.3	0.15	0.11	0.1			b	b	b	b	b	b	b	b	b	b	b	b
									a	a	a	a	a	a	a	a	b	b	b	b
									a	a	a	a	a	a	a	a	a	a	b	b
									a	a	a	a	a	a	a	a	a	b	b	b
									a	a	a	a	a	a	a	a	b	b	b	b
									a	a	a	a	a	a	a	a	b	b	b	b
									b	b	b	b	b	b	b	b	b	b	b	b
									a	a	a	a	a	a	a	a	a	a	b	b
									a	a	a	a	a	a	a	a	a	b	b	b
									a	a	a	a	a	a	a	a	b	b	b	b
									b	b	a	b	b	b	b	b	b	b	b	b
									a	a	a	a	a	a	a	a	a	b	b	b
									a	a	a	a	a	a	a	a	a	a	a	a
									b	b	b	b	b	b	b	b	b	b	b	b
									a	a	a	a	a	a	a	a	a	a	a	b
									a	a	a	a	b	b	b	b	b	b	b	b
									a	a	a	a	a	a	a	a	a	a	a	a
									a	a	a	a	a	a	a	a	b	b	b	b
									a	a	a	a	a	a	a	a	a	a	a	a
									b	b	b	b	b	b	b	b	b	b	b	b
									b	b	b	b	b	b	b	b	b	b	b	b
									b	b	b	b	b	b	b	b	b	b	b	b
									b	b	b	b	b	b	b	b	b	b	b	b
									a	a	a	a	a	a	b	b	b	b	b	b
									a	a	a	a	a	a	a	a	a	b	b	b
									a	a	a	a	a	a	b	a	b	b	b	b
									a	a	a	a	b	b	b	b	b	b	b	b
									a	a	a	a	a	a	a	a	a	a	a	a
									a	a	a	a	a	a	a	a	a	a	b	b
									a	a	a	a	a	a	a	a	b	b	b	b
									a	a	a	a	a	a	a	a	a	a	b	b
									a	a	a	a	a	a	a	a	b	b	b	b
									a	a	a	a	a	a	b	b	b	b	b	b
									b	b	b	b	b	b	b	b	b	b	b	b
									b	b	b	b	b	b	b	b	b	b	b	b
									b	b	b	b	b	b	b	b	b	b	b	b
									a	a	a	a	a	a	a	a	a	a	a	a
									b	b	b	b	b	b	b	b	b	b	b	b
									b	b	b	b	b	b	b	b	b	b	b	b
									a	a	a	a	a	a	a	a	a	a	a	a
									a	a	a	a	a	a	a	a	a	a	a	a
									a	a	a	a	a	a	a	a	a	b	b	b
									a	a	a	a	a	a	b	b	b	b	b	b
									a	a	a	a	a	a	b	b	b	b	b	b
									a	a	a	a	a	a	a	a	a	b	b	b
									a	a	a	a	a	a	b	b	b	b	b	b
									a	a	a	a	b	b	b	b	b	b	b	b
									b	b	b	b	b	b	b	b	b	b	b	b
									b	b	b	b	b	b	b	b	b	b	b	b
									a	a	a	a	a	a	a	a	a	b	b	b
									a	a	a	a	a	a	a	a	a	a	a	a
									b	a	a	b	b	b	b	b	b	b	b	b
									b	a	a	a	b	b	b	b	b	b	b	b
									a	a	a	a	a	a	a	a	a	b	b	b
									b	a	a	a	b	b	b	b	b	b	b	b
									b	b	b	b	b	b	b	b	b	b	b	b
									a	a	a	a	a	a	a	a	a	b	b	b
									a	a	a	a	a	a	a	a	b	b	b	b
									b	b	b	b	b	b	b	b	b	b	b	b
									b	a	a	b	b	b	b	b	b	b	b	b
									b	b	b	b	b	b	b	b	b	b	b	b
									b	a	a	a	b	b	b	b	b	b	b	b
									a	a	a	a	a	a	a	a	a	b	b	b
									b	a	a	a	b	b	b	b	b	b	b	b
									a	a	a	a	a	a	b	b	b	b	b	b
									a	a	a	a	a	a	a	a	b	b	b	b
									b	b	b	b	b	b	b	b	b	b	b	b
									a	a	a	a	a	a	b	a	b	b	b	b
									a	a	a	a	a	a	a	a	b	b	b	b
									a	a	a	a	a	a	a	a	a	a	a	a
									a	a	a	a	a	a	a	a	a	b	b	b
									a	a	a	a	a	b	b	b	b	b	b	b
									a	a	a	a	b	b	b	b	b	b	b	b
									b	b	b	b	b	b	b	b	b	b	b	b
									b	b	b	b	b	b	b	b	b	b	b	b
									b	b	b	b	b	b	b	b	b	b	b	b
									a	a	a	a	b	b	b	b	b	b	b	b
									a	a	a	a	a	a	a	a	a	b	b	b
									b	b	a	b	b	b	b	b	b	b	b	b
									a	a	a	a	a	a	a	a	b	b	b	b
									a	a	a	a	a	a	a	a	a	a	b	b
									b	b	b	b	b	b	b	b	b	b	b	b
									a	a	a	a	a	a	a	a	a	b	b	b
									a	a	a	a	a	a	a	a	b	b	b	b
									b	b	b	b	b	b	b	b	b	b	b	b
									a	a	a	a	a	a	a	a	b	b	b	b
									a	a	a	a	a	a	a	a	a	b	b	b
									b	b	a	b	b	b	b	b	b	b	b	b
									b	a	a	b	b	b	b	b	b	b	b	b
									a	a	a	a	a	a	a	a	b	b	b	b
									a	a	a	a	a	a	a	a	b	b	b	b
									a	a	a	a	a	a	a	a	a	b	b	b
									a	a	a	a	b	b	b	b	b	b	b	b
									a	a	a	a	a	a	b	b	b	b	b	b
									b	a	a	b	b	b	b	b	b	b	b	b
									b	b	b	b	b	b	b	b	b	b	b	b
									a	a	a	a	a	a	b	b	b	b	b	b
									b	a	a	b	b	b	b	b	b	b	b	b
									b	b	b	b	b	b	b	b	b	b	b	b
									a	a	a	a	a	a	a	a	a	b	b	b
									b	b	b	b	b	b	b	b	b	b	b	b
									a	a	a	a	a	a	a	a	a	b	b	b
									b	b	b	b	b	b	b	b	b	b	b	b
									a	a	a	a	a	a	b	a	b	b	b	b
									a	a	a	a	b	b	b	b	b	b	b	b
									a	a	a	a	a	a	a	a	a	b	b	b
									a	a	a	a	a	a	a	a	a	a	b	b
									a	a	a	a	a	a	a	a	b	b	b	b
									a	a	a	a	a	a	a	a	a	a	b	b
									b	b	b	b	b	b	b	b	b	b	b	b
									b	b	b	b	b	b	b	b	b	b	b	b
									a	a	a	a	a	a	a	a	b	b	b	b
									b	b	a	b	b	b	b	b	b	b	b	b
									b	a	a	a	b	b	b	b	b	b	b	b
									b	a	a	a	b	b	b	b	b	b	b	b
									b	b	b	b	b	b	b	b	b	b	b	b
									a	a	a	a	a	a	a	a	a	a	a	a
									a	a	a	a	a	a	a	a	b	b	b	b
									a	a	a	a	a	a	b	b	b	b	b	b
									b	a	a	b	b	b	b	b	b	b	b	b
									a	a	a	a	a	a	a	a	b	b	b	b
									a	a	a	a	a	a	b	b	b	b	b	b
									a	a	a	a	a	a	b	b	b	b	b	b
									a	a	a	a	a	a	a	a	b	b	b	b
									b	b	b	b	b	b	b	b	b	b	b	b
									a	a	a	a	a	a	a	a	b	b	b	b
									a	a	a	a	a	a	a	a	b	b	b	b
									a	a	a	a	a	a	a	a	a	a	a	a
									a	a	a	a	a	a	a	a	a	b	b	b
									a	a	a	a	a	a	b	a	b	b	b	b
									a	a	a	a	a	a	a	a	a	b	b	b
									a	a	a	a	a	a	b	b	b	b	b	b
									a	a	a	a	a	a	b	b	b	b	b	b
									a	a	a	a	a	a	a	a	a	a	b	b
									a	a	a	a	a	a	a	a	a	a	a	a
									a	a	a	a	a	a	a	a	a	b	b	b
									a	a	a	a	a	a	a	a	a	b	b	b
									a	a	a	a	a	a	a	a	b	b	b	b
									a	a	a	a	a	a	a	a	b	b	b	b
									a	a	a	a	a	a	a	a	b	b	b	b
									a	a	a	a	a	a	a	a	a	a	a	a
									b	a	a	a	b	b	b	b	b	b	b	b
									b	b	b	b	b	b	b	b	b	b	b	b
									b	b	a	b	b	b	b	b	b	b	b	b
									a	a	a	a	a	a	b	a	b	b	b	b
									b	b	b	b	b	b	b	b	b	b	b	b
									a	a	a	a	a	a	a	a	a	b	b	b
									a	a	a	a	a	a	b	b	b	b	b	b
									a	a	a	a	a	a	a	a	a	a	a	a
									a	a	a	a	a	a	a	a	a	b	b	b
									a	a	a	a	a	a	a	a	a	a	a	b
									a	a	a	a	b	b	b	b	b	b	b	b
									b	b	b	b	b	b	b	b	b	b	b	b
									a	a	a	a	a	a	a	a	a	b	b	b
									a	a	a	a	a	a	b	b	b	b	b	b
									a	a	a	a	a	a	a	a	a	a	a	a
									b	b	b	b	b	b	b	b	b	b	b	b
									b	b	b	b	b	b	b	b	b	b	b	b
									a	a	a	a	a	a	a	a	a	a	a	a
									a	a	a	a	a	a	a	a	a	a	a	a
									a	a	a	a	a	a	b	b	b	b	b	b
									a	a	a	a	a	a	a	a	b	b	b	b
									b	b	a	b	b	b	b	b	b	b	b	b
									a	a	a	a	a	a	a	a	a	b	b	b
									a	a	a	a	b	b	b	b	b	b	b	b
									a	a	a	a	a	a	a	a	a	b	b	b
									a	a	a	a	a	a	b	a	b	b	b	b
									b	b	b	b	b	b	b	b	b	b	b	b
									a	a	a	a	a	a	a	a	a	b	b	b
									b	b	b	b	b	b	b	b	b	b	b	b
									b	b	a	b	b	b	b	b	b	b	b	b
									a	a	a	a	a	a	a	a	a	a	b	b
									a	a	a	a	a	a	a	a	a	a	a	a
									a	a	a	a	a	a	b	b	b	b	b	b
									a	a	a	a	a	a	a	a	a	b	b	b
									b	a	a	a	b	b	b	b	b	b	b	b
									a	a	a	a	a	a	a	a	b	b	b	b
									b	b	b	b	b	b	b	b	b	b	b	b
									b	b	b	b	b	b	b	b	b	b	b	b
									a	a	a	a	a	a	b	b	b	b	b	b
									b	b	b	b	b	b	b	b	b	b	b	b
									b	b	a	b	b	b	b	b	b	b	b	b
									a	a	a	a	a	a	a	a	b	b	b	b
									b	a	a	b	b	b	b	b	b	b	b	b
									a	a	a	a	a	b	b	b	b	b	b	b
									a	a	a	a	a	a	a	a	b	b	b	b
									b	b	b	b	b	b	b	b	b	b	b	b
									a	a	a	a	a	a	a	a	a	b	b	b
									a	a	a	a	a	a	a	a	b	b	b	b
									a	a	a	a	a	a	b	b	b	b	b	b
									a	a	a	a	a	a	b	b	b	b	b	b
									a	a	a	a	a	a	a	a	b	b	b	b
									b	b	b	b	b	b	b	b	b	b	b	b
									a	a	a	a	a	a	a	a	b	b	b	b
									b	a	a	a	b	b	b	b	b	b	b	b
									b	b	b	b	b	b	b	b	b	b	b	b
									a	a	a	a	a	a	a	a	a	a	a	a
									a	a	a	a	a	a	a	a	a	b	b	b
									b	a	a	b	b	b	b	b	b	b	b	b
									b	a	a	a	b	b	b	b	b	b	b	b
									a	a	a	a	a	a	b	b	b	b	b	b
									b	b	b	b	b	b	b	b	b	b	b	b
									a	a	a	a	a	a	b	b	b	b	b	b
									b	b	b	b	b	b	b	b	b	b	b	b
									a	a	a	a	a	a	a	a	a	b	b	b
									b	a	a	b	b	b	b	b	b	b	b	b
									a	a	a	a	a	a	b	b	b	b	b	b
									a	a	a	a	a	a	a	a	a	a	a	a
									a	a	a	a	a	a	b	b	b	b	b	b
									a	a	a	a	a	a	a	a	a	a	a	a
									b	a	a	a	b	b	b	b	b	b	b	b

## Sheet: Table 1
						Raw data	Male		Female		Male		Female		Female		Color		Size		Size		Color		Color
Customer number	Gender	Detail satisfaction	Detail deficiency	Average Satisfaction			a	b	a	b	a	b	a	b	a	b	c	d	c	d	c	d	c	d	c	d
1	Male	0.93	Color	0.934			a	b	a	b	a	b	a	b	a	b	c	d	c	d	c	d	c	d	c	d
2	Female	0.953	Size	0.941			a	b	a	b	a	b	a	b	a	b	c	d	c	d	c	d	c	d	c	d
3	Male	0.95	Size	0.938			a	b	a	b	a	b	a	b	a	b	c	d	c	d	c	d	c	d	c	d
4	Female	0.92	Color	0.927			a	b	a	b	a	b	a	b	a	b	c	d	c	d	c	d	c	d	c	d
5	Female	0.935	Color	0.933			a	b	a	b	a	b	a	b	a	b	c	d	c	d	c	d	c	d	c	d
							a	b	a	b	a	b	a	b	a	b	c	d	c	d	c	d	c	d	c	d
		Number of people satisfied/a	Total number of people surveyed/b				a	b	a	b	a	b	a	b	a	b	c	d	c	d	c	d	c	d	c	d
	Male	274	295				a	b	a	b	a	b	a	b	a	b	c	d	c	d	c	d	c	d	c	d
	Female	219	230				a	b	a	b	a	b	a	b	a	b	c	d	c	d	c	d	c	d	c	d
	Male	338	356				a	b	a	b	a	b	a	b	a	b	c	d	c	d	c	d	c	d	c	d
	Female	361	392				a	b	a	b	a	b	a	b	a	b	c	d	c	d	c	d	c	d	c	d
	Female	299	320				a	b	a	b	a	b	a	b	a	b	c	d	c	d	c	d	c	d	c	d
							a	b	a	b	a	b	a	b	a	b	c	d	c	d	c	d	c	d	c	d
		Number of people satisfied/c	Total number of people surveyed/d				a	b	a	b	a	b	a	b	a	b	c	d	c	d	c	d	c	d	c	d
	Color	252	270				a	b	a	b	a	b	a	b	a	b	c	d	c	d	c	d	c	d	c	d
	Size	209	222				a	b	a	b	a	b	a	b	a	b	c	d	c	d	c	d	c	d	c	d
	Size	255	272				a	b	a	b	a	b	a	b	a	b	c	d	c	d	c	d	c	d	c	d
	Color	226	244				a	b	a	b	a	b	a	b	a	b	c	d	c	d	c	d	c	d	c	d
	Color	348	373				a	b	a	b	a	b	a	b	a	b	c	d	c	d	c	d	c	d	c	d
							a	b	a	b	a	b	a	b	a	b	c	d	c	d	c	d	c	d	c	d
							a	b	a	b	a	b	a	b	a	b	c	d	c	d	c	d	c	d	c	d
							a	b	a	b	a	b	a	b	a	b	c	d	c	d	c	d	c	d	c	d
							a	b	a	b	a	b	a	b	a	b	c	d	c	d	c	d	c	d	c	d
							a	b	a	b	a	b	a	b	a	b	c	d	c	d	c	d	c	d	c	d
							a	b	a	b	a	b	a	b	a	b	c	d	c	d	c	d	c	d	c	d
							a	b	a	b	a	b	a	b	a	b	c	d	c	d	c	d	c	d	c	d
							a	b	a	b	a	b	a	b	a	b	c	d	c	d	c	d	c	d	c	d
							a	b	a	b	a	b	a	b	a	b	c	d	c	d	c	d	c	d	c	d
							a	b	a	b	a	b	a	b	a	b	c	d	c	d	c	d	c	d	c	d
							a	b	a	b	a	b	a	b	a	b	c	d	c	d	c	d	c	d	c	d
							a	b	a	b	a	b	a	b	a	b	c	d	c	d	c	d	c	d	c	d
							a	b	a	b	a	b	a	b	a	b	c	d	c	d	c	d	c	d	c	d
							a	b	a	b	a	b	a	b	a	b	c	d	c	d	c	d	c	d	c	d
							a	b	a	b	a	b	a	b	a	b	c	d	c	d	c	d	c	d	c	d
							a	b	a	b	a	b	a	b	a	b	c	d	c	d	c	d	c	d	c	d
							a	b	a	b	a	b	a	b	a	b	c	d	c	d	c	d	c	d	c	d
							a	b	a	b	a	b	a	b	a	b	c	d	c	d	c	d	c	d	c	d
							a	b	a	b	a	b	a	b	a	b	c	d	c	d	c	d	c	d	c	d
							a	b	a	b	a	b	a	b	a	b	c	d	c	d	c	d	c	d	c	d
							a	b	a	b	a	b	a	b	a	b	c	d	c	d	c	d	c	d	c	d
							a	b	a	b	a	b	a	b	a	b	c	d	c	d	c	d	c	d	c	d
							a	b	a	b	a	b	a	b	a	b	c	d	c	d	c	d	c	d	c	d
							a	b	a	b	a	b	a	b	a	b	c	d	c	d	c	d	c	d	c	d
							a	b	a	b	a	b	a	b	a	b	c	d	c	d	c	d	c	d	c	d
							a	b	a	b	a	b	a	b	a	b	c	d	c	d	c	d	c	d	c	d
							a	b	a	b	a	b	a	b	a	b	c	d	c	d	c	d	c	d	c	d
							a	b	a	b	a	b	a	b	a	b	c	d	c	d	c	d	c	d	c	d
							a	b	a	b	a	b	a	b	a	b	c	d	c	d	c	d	c	d	c	d
							a	b	a	b	a	b	a	b	a	b	c	d	c	d	c	d	c	d	c	d
							a	b	a	b	a	b	a	b	a	b	c	d	c	d	c	d	c	d	c	d
							a	b	a	b	a	b	a	b	a	b	c	d	c	d	c	d	c	d	c	d
							a	b	a	b	a	b	a	b	a	b	c	d	c	d	c	d	c	d	c	d
							a	b	a	b	a	b	a	b	a	b	c	d	c	d	c	d	c	d	c	d
							a	b	a	b	a	b	a	b	a	b	c	d	c	d	c	d	c	d	c	d
							a	b	a	b	a	b	a	b	a	b	c	d	c	d	c	d	c	d	c	d
							a	b	a	b	a	b	a	b	a	b	c	d	c	d	c	d	c	d	c	d
							a	b	a	b	a	b	a	b	a	b	c	d	c	d	c	d	c	d	c	d
							a	b	a	b	a	b	a	b	a	b	c	d	c	d	c	d	c	d	c	d
							a	b	a	b	a	b	a	b	a	b	c	d	c	d	c	d	c	d	c	d
							a	b	a	b	a	b	a	b	a	b	c	d	c	d	c	d	c	d	c	d
							a	b	a	b	a	b	a	b	a	b	c	d	c	d	c	d	c	d	c	d
							a	b	a	b	a	b	a	b	a	b	c	d	c	d	c	d	c	d	c	d
							a	b	a	b	a	b	a	b	a	b	c	d	c	d	c	d	c	d	c	d
							a	b	a	b	a	b	a	b	a	b	c	d	c	d	c	d	c	d	c	d
							a	b	a	b	a	b	a	b	a	b	c	d	c	d	c	d	c	d	c	d
							a	b	a	b	a	b	a	b	a	b	c	d	c	d	c	d	c	d	c	d
							a	b	a	b	a	b	a	b	a	b	c	d	c	d	c	d	c	d	c	d
							a	b	a	b	a	b	a	b	a	b	c	d	c	d	c	d	c	d	c	d
							a	b	a	b	a	b	a	b	a	b	c	d	c	d	c	d	c	d	c	d
							a	b	a	b	a	b	a	b	a	b	c	d	c	d	c	d	c	d	c	d
							a	b	a	b	a	b	a	b	a	b	c	d	c	d	c	d	c	d	c	d
							a	b	a	b	a	b	a	b	a	b	c	d	c	d	c	d	c	d	c	d
							a	b	a	b	a	b	a	b	a	b	c	d	c	d	c	d	c	d	c	d
							a	b	a	b	a	b	a	b	a	b	c	d	c	d	c	d	c	d	c	d
							a	b	a	b	a	b	a	b	a	b	c	d	c	d	c	d	c	d	c	d
							a	b	a	b	a	b	a	b	a	b	c	d	c	d	c	d	c	d	c	d
							a	b	a	b	a	b	a	b	a	b	c	d	c	d	c	d	c	d	c	d
							a	b	a	b	a	b	a	b	a	b	c	d	c	d	c	d	c	d	c	d
							a	b	a	b	a	b	a	b	a	b	c	d	c	d	c	d	c	d	c	d
							a	b	a	b	a	b	a	b	a	b	c	d	c	d	c	d	c	d	c	d
							a	b	a	b	a	b	a	b	a	b	c	d	c	d	c	d	c	d	c	d
							a	b	a	b	a	b	a	b	a	b	c	d	c	d	c	d	c	d	c	d
							a	b	a	b	a	b	a	b	a	b	c	d	c	d	c	d	c	d	c	d
							a	b	a	b	a	b	a	b	a	b	c	d	c	d	c	d	c	d	c	d
							a	b	a	b	a	b	a	b	a	b	c	d	c	d	c	d	c	d	c	d
							a	b	a	b	a	b	a	b	a	b	c	d	c	d	c	d	c	d	c	d
							a	b	a	b	a	b	a	b	a	b	c	d	c	d	c	d	c	d	c	d
							a	b	a	b	a	b	a	b	a	b	c	d	c	d	c	d	c	d	c	d
							a	b	a	b	a	b	a	b	a	b	c	d	c	d	c	d	c	d	c	d
							a	b	a	b	a	b	a	b	a	b	c	d	c	d	c	d	c	d	c	d
							a	b	a	b	a	b	a	b	a	b	c	d	c	d	c	d	c	d	c	d
							a	b	a	b	a	b	a	b	a	b	c	d	c	d	c	d	c	d	c	d
							a	b	a	b	a	b	a	b	a	b	c	d	c	d	c	d	c	d	c	d
							a	b	a	b	a	b	a	b	a	b	c	d	c	d	c	d	c	d	c	d
							a	b	a	b	a	b	a	b	a	b	c	d	c	d	c	d	c	d	c	d
							a	b	a	b	a	b	a	b	a	b	c	d	c	d	c	d	c	d	c	d
							a	b	a	b	a	b	a	b	a	b	c	d	c	d	c	d	c	d	c	d
							a	b	a	b	a	b	a	b	a	b	c	d	c	d	c	d	c	d	c	d
							a	b	a	b	a	b	a	b	a	b	c	d	c	d	c	d	c	d	c	d
							a	b	a	b	a	b	a	b	a	b	c	d	c	d	c	d	c	d	c	d
							a	b	a	b	a	b	a	b	a	b	c	d	c	d	c	d	c	d	c	d
							a	b	a	b	a	b	a	b	a	b	c	d	c	d	c	d	c	d	c	d
							a	b	a	b	a	b	a	b	a	b	c	d	c	d	c	d	c	d	c	d
							a	b	a	b	a	b	a	b	a	b	c	d	c	d	c	d	c	d	c	d
							a	b	a	b	a	b	a	b	a	b	c	d	c	d	c	d	c	d	c	d
							a	b	a	b	a	b	a	b	a	b	c	d	c	d	c	d	c	d	c	d
							a	b	a	b	a	b	a	b	a	b	c	d	c	d	c	d	c	d	c	d
							a	b	a	b	a	b	a	b	a	b	c	d	c	d	c	d	c	d	c	d
							a	b	a	b	a	b	a	b	a	b	c	d	c	d	c	d	c	d	c	d
							a	b	a	b	a	b	a	b	a	b	c	d	c	d	c	d	c	d	c	d
							a	b	a	b	a	b	a	b	a	b	c	d	c	d	c	d	c	d	c	d
							a	b	a	b	a	b	a	b	a	b	c	d	c	d	c	d	c	d	c	d
							a	b	a	b	a	b	a	b	a	b	c	d	c	d	c	d	c	d	c	d
							a	b	a	b	a	b	a	b	a	b	c	d	c	d	c	d	c	d	c	d
							a	b	a	b	a	b	a	b	a	b	c	d	c	d	c	d	c	d	c	d
							a	b	a	b	a	b	a	b	a	b	c	d	c	d	c	d	c	d	c	d
							a	b	a	b	a	b	a	b	a	b	c	d	c	d	c	d	c	d	c	d
							a	b	a	b	a	b	a	b	a	b	c	d	c	d	c	d	c	d	c	d
							a	b	a	b	a	b	a	b	a	b	c	d	c	d	c	d	c	d	c	d
							a	b	a	b	a	b	a	b	a	b	c	d	c	d	c	d	c	d	c	d
							a	b	a	b	a	b	a	b	a	b	c	d	c	d	c	d	c	d	c	d
							a	b	a	b	a	b	a	b	a	b	c	d	c	d	c	d	c	d	c	d
							a	b	a	b	a	b	a	b	a	b	c	d	c	d	c	d	c	d	c	d
							a	b	a	b	a	b	a	b	a	b	c	d	c	d	c	d	c	d	c	d
							a	b	a	b	a	b	a	b	a	b	c	d	c	d	c	d	c	d	c	d
							a	b	a	b	a	b	a	b	a	b	c	d	c	d	c	d	c	d	c	d
							a	b	a	b	a	b	a	b	a	b	c	d	c	d	c	d	c	d	c	d
							a	b	a	b	a	b	a	b	a	b	c	d	c	d	c	d	c	d	c	d
							a	b	a	b	a	b	a	b	a	b	c	d	c	d	c	d	c	d	c	d
							a	b	a	b	a	b	a	b	a	b	c	d	c	d	c	d	c	d	c	d
							a	b	a	b	a	b	a	b	a	b	c	d	c	d	c	d	c	d	c	d
							a	b	a	b	a	b	a	b	a	b	c	d	c	d	c	d	c	d	c	d
							a	b	a	b	a	b	a	b	a	b	c	d	c	d	c	d	c	d	c	d
							a	b	a	b	a	b	a	b	a	b	c	d	c	d	c	d	c	d	c	d
							a	b	a	b	a	b	a	b	a	b	c	d	c	d	c	d	c	d	c	d
							a	b	a	b	a	b	a	b	a	b	c	d	c	d	c	d	c	d	c	d
							a	b	a	b	a	b	a	b	a	b	c	d	c	d	c	d	c	d	c	d
							a	b	a	b	a	b	a	b	a	b	c	d	c	d	c	d	c	d	c	d
							a	b	a	b	a	b	a	b	a	b	c	d	c	d	c	d	c	d	c	d
							a	b	a	b	a	b	a	b	a	b	c	d	c	d	c	d	c	d	c	d
							a	b	a	b	a	b	a	b	a	b	c	d	c	d	c	d	c	d	c	d
							a	b	a	b	a	b	a	b	a	b	c	d	c	d	c	d	c	d	c	d
							a	b	a	b	a	b	a	b	a	b	c	d	c	d	c	d	c	d	c	d
							a	b	a	b	a	b	a	b	a	b	c	d	c	d	c	d	c	d	c	d
							a	b	a	b	a	b	a	b	a	b	c	d	c	d	c	d	c	d	c	d
							a	b	a	b	a	b	a	b	a	b	c	d	c	d	c	d	c	d	c	d
							a	b	a	b	a	b	a	b	a	b	c	d	c	d	c	d	c	d	c	d
							a	b	a	b	a	b	a	b	a	b	c	d	c	d	c	d	c	d	c	d
							a	b	a	b	a	b	a	b	a	b	c	d	c	d	c	d	c	d	c	d
							a	b	a	b	a	b	a	b	a	b	c	d	c	d	c	d	c	d	c	d
							a	b	a	b	a	b	a	b	a	b	c	d	c	d	c	d	c	d	c	d
							a	b	a	b	a	b	a	b	a	b	c	d	c	d	c	d	c	d	c	d
							a	b	a	b	a	b	a	b	a	b	c	d	c	d	c	d	c	d	c	d
							a	b	a	b	a	b	a	b	a	b	c	d	c	d	c	d	c	d	c	d
							a	b	a	b	a	b	a	b	a	b	c	d	c	d	c	d	c	d	c	d
							a	b	a	b	a	b	a	b	a	b	c	d	c	d	c	d	c	d	c	d
							a	b	a	b	a	b	a	b	a	b	c	d	c	d	c	d	c	d	c	d
							a	b	a	b	a	b	a	b	a	b	c	d	c	d	c	d	c	d	c	d
							a	b	a	b	a	b	a	b	a	b	c	d	c	d	c	d	c	d	c	d
							a	b	a	b	a	b	a	b	a	b	c	d	c	d	c	d	c	d	c	d
							a	b	a	b	a	b	a	b	a	b	c	d	c	d	c	d	c	d	c	d
							a	b	a	b	a	b	a	b	a	b	c	d	c	d	c	d	c	d	c	d
							a	b	a	b	a	b	a	b	a	b	c	d	c	d	c	d	c	d	c	d
							a	b	a	b	a	b	a	b	a	b	c	d	c	d	c	d	c	d	c	d
							a	b	a	b	a	b	a	b	a	b	c	d	c	d	c	d	c	d	c	d
							a	b	a	b	a	b	a	b	a	b	c	d	c	d	c	d	c	d	c	d
							a	b	a	b	a	b	a	b	a	b	c	d	c	d	c	d	c	d	c	d
							a	b	a	b	a	b	a	b	a	b	c	d	c	d	c	d	c	d	c	d
							a	b	a	b	a	b	a	b	a	b	c	d	c	d	c	d	c	d	c	d
							a	b	a	b	a	b	a	b	a	b	c	d	c	d	c	d	c	d	c	d
							a	b	a	b	a	b	a	b	a	b	c	d	c	d	c	d	c	d	c	d
							a	b	a	b	a	b	a	b	a	b	c	d	c	d	c	d	c	d	c	d
							a	b	a	b	a	b	a	b	a	b	c	d	c	d	c	d	c	d	c	d
							a	b	a	b	a	b	a	b	a	b	c	d	c	d	c	d	c	d	c	d
							a	b	a	b	a	b	a	b	a	b	c	d	c	d	c	d	c	d	c	d
							a	b	a	b	a	b	a	b	a	b	c	d	c	d	c	d	c	d	c	d
							a	b	a	b	a	b	a	b	a	b	c	d	c	d	c	d	c	d	c	d
							a	b	a	b	a	b	a	b	a	b	c	d	c	d	c	d	c	d	c	d
							a	b	a	b	a	b	a	b	a	b	c	d	c	d	c	d	c	d	c	d
							a	b	a	b	a	b	a	b	a	b	c	d	c	d	c	d	c	d	c	d
							a	b	a	b	a	b	a	b	a	b	c	d	c	d	c	d	c	d	c	d
							a	b	a	b	a	b	a	b	a	b	c	d	c	d	c	d	c	d	c	d
							a	b	a	b	a	b	a	b	a	b	c	d	c	d	c	d	c	d	c	d
							a	b	a	b	a	b	a	b	a	b	c	d	c	d	c	d	c	d	c	d
							a	b	a	b	a	b	a	b	a	b	c	d	c	d	c	d	c	d	c	d
							a	b	a	b	a	b	a	b	a	b	c	d	c	d	c	d	c	d	c	d
							a	b	a	b	a	b	a	b	a	b	c	d	c	d	c	d	c	d	c	d
							a	b	a	b	a	b	a	b	a	b	c	d	c	d	c	d	c	d	c	d
							a	b	a	b	a	b	a	b	a	b	c	d	c	d	c	d	c	d	c	d
							a	b	a	b	a	b	a	b	a	b	c	d	c	d	c	d	c	d	c	d
							a	b	a	b	a	b	a	b	a	b	c	d	c	d	c	d	c	d	c	d
							a	b	a	b	a	b	a	b	a	b	c	d	c	d	c	d	c	d	c	d
							a	b	a	b	a	b	a	b	a	b	c	d	c	d	c	d	c	d	c	d
							a	b	a	b	a	b	a	b	a	b	c	d	c	d	c	d	c	d	c	d
							a	b	a	b	a	b	a	b	a	b	c	d	c	d	c	d	c	d	c	d
							a	b	a	b	a	b	a	b	a	b	c	d	c	d	c	d	c	d	c	d
							a	b	a	b	a	b	a	b	a	b	c	d	c	d	c	d	c	d	c	d
							a	b	a	b	a	b	a	b	a	b	c	d	c	d	c	d	c	d	c	d
							a	b	a	b	a	b	a	b	a	b	c	d	c	d	c	d	c	d	c	d
							a	b	a	b	a	b	a	b	a	b	c	d	c	d	c	d	c	d	c	d
							a	b	a	b	a	b	a	b	a	b	c	d	c	d	c	d	c	d	c	d
							a	b	a	b	a	b	a	b	a	b	c	d	c	d	c	d	c	d	c	d
							a	b	a	b	a	b	a	b	a	b	c	d	c	d	c	d	c	d	c	d
							a	b	a	b	a	b	a	b	a	b	c	d	c	d	c	d	c	d	c	d
							a	b	a	b	a	b	a	b	a	b	c	d	c	d	c	d	c	d	c	d
							a	b	a	b	a	b	a	b	a	b	c	d	c	d	c	d	c	d	c	d
							a	b	a	b	a	b	a	b	a	b	c	d	c	d	c	d	c	d	c	d
							a	b	a	b	a	b	a	b	a	b	c	d	c	d	c	d	c	d	c	d
							a	b	a	b	a	b	a	b	a	b	c	d		d	c	d	c	d	c	d
							a	b	a	b	a	b	a	b	a	b	c	d		d	c	d	c	d	c	d
							a	b	a	b	a	b	a	b	a	b	c	d		d	c	d	c	d	c	d
							a	b	a	b	a	b	a	b	a	b	c	d		d	c	d	c	d	c	d
							a	b	a	b	a	b	a	b	a	b	c	d		d	c	d	c	d	c	d
							a	b	a	b	a	b	a	b	a	b	c	d		d	c	d	c	d	c	d
							a	b	a	b	a	b	a	b	a	b	c	d		d	c	d	c	d	c	d
							a	b	a	b	a	b	a	b	a	b	c	d		d	c	d	c	d	c	d
							a	b	a	b	a	b	a	b	a	b	c	d		d	c	d	c	d	c	d
							a	b	a	b	a	b	a	b	a	b	c	d		d	c	d	c	d	c	d
							a	b		b	a	b	a	b	a	b	c	d		d	c	d	c	d	c	d
							a	b		b	a	b	a	b	a	b	c	d		d	c	d	c	d	c	d
							a	b		b	a	b	a	b	a	b	c	d		d	c	d	c	d	c	d
							a	b		b	a	b	a	b	a	b	c	d			c	d	c	d	c	d
							a	b		b	a	b	a	b	a	b	c	d			c	d	c	d	c	d
							a	b		b	a	b	a	b	a	b	c	d			c	d	c	d	c	d
							a	b		b	a	b	a	b	a	b	c	d			c	d	c	d	c	d
							a	b		b	a	b	a	b	a	b	c	d			c	d		d	c	d
							a	b		b	a	b	a	b	a	b	c	d			c	d		d	c	d
							a	b		b	a	b	a	b	a	b	c	d			c	d		d	c	d
							a	b		b	a	b	a	b	a	b	c	d			c	d		d	c	d
							a	b			a	b	a	b	a	b	c	d			c	d		d	c	d
							a	b			a	b	a	b	a	b	c	d			c	d		d	c	d
							a	b			a	b	a	b	a	b	c	d			c	d		d	c	d
							a	b			a	b	a	b	a	b	c	d			c	d		d	c	d
							a	b			a	b	a	b	a	b	c	d			c	d		d	c	d
							a	b			a	b	a	b	a	b	c	d			c	d		d	c	d
							a	b			a	b	a	b	a	b	c	d			c	d		d	c	d
							a	b			a	b	a	b	a	b	c	d			c	d		d	c	d
							a	b			a	b	a	b	a	b	c	d			c	d		d	c	d
							a	b			a	b	a	b	a	b	c	d			c	d		d	c	d
							a	b			a	b	a	b	a	b	c	d			c	d		d	c	d
							a	b			a	b	a	b	a	b	c	d			c	d		d	c	d
							a	b			a	b	a	b	a	b	c	d			c	d		d	c	d
							a	b			a	b	a	b	a	b	c	d			c	d		d	c	d
							a	b			a	b	a	b	a	b	c	d			c	d			c	d
							a	b			a	b	a	b	a	b	c	d			c	d			c	d
							a	b			a	b	a	b	a	b	c	d			c	d			c	d
							a	b			a	b	a	b	a	b	c	d			c	d			c	d
							a	b			a	b	a	b	a	b	c	d			c	d			c	d
							a	b			a	b	a	b	a	b	c	d			c	d			c	d
							a	b			a	b	a	b	a	b	c	d			c	d			c	d
							a	b			a	b	a	b	a	b	c	d			c	d			c	d
							a	b			a	b	a	b	a	b		d			c	d			c	d
							a	b			a	b	a	b	a	b		d			c	d			c	d
							a	b			a	b	a	b	a	b		d			c	d			c	d
							a	b			a	b	a	b	a	b		d				d			c	d
							a	b			a	b	a	b	a	b		d				d			c	d
							a	b			a	b	a	b	a	b		d				d			c	d
							a	b			a	b	a	b	a	b		d				d			c	d
							a	b			a	b	a	b	a	b		d				d			c	d
							a	b			a	b	a	b	a	b		d				d			c	d
							a	b			a	b	a	b	a	b		d				d			c	d
							a	b			a	b	a	b	a	b		d				d			c	d
							a	b			a	b	a	b	a	b		d				d			c	d
							a	b			a	b	a	b	a	b		d				d			c	d
							a	b			a	b	a	b	a	b		d				d			c	d
							a	b			a	b	a	b	a	b		d				d			c	d
							a	b			a	b	a	b	a	b		d				d			c	d
							a	b			a	b	a	b	a	b		d				d			c	d
							a	b			a	b	a	b	a	b		d				d			c	d
							a	b			a	b	a	b	a	b						d			c	d
							a	b			a	b	a	b	a	b						d			c	d
							a	b			a	b	a	b	a	b									c	d
							a	b			a	b	a	b	a	b									c	d
								b			a	b	a	b	a	b									c	d
								b			a	b	a	b	a	b									c	d
								b			a	b	a	b	a	b									c	d
								b			a	b	a	b	a	b									c	d
								b			a	b	a	b	a	b									c	d
								b			a	b	a	b	a	b									c	d
								b			a	b	a	b	a	b									c	d
								b			a	b	a	b	a	b									c	d
								b			a	b	a	b	a	b									c	d
								b			a	b	a	b	a	b									c	d
								b			a	b	a	b	a	b									c	d
								b			a	b	a	b	a	b									c	d
								b			a	b	a	b	a	b									c	d
								b			a	b	a	b	a	b									c	d
								b			a	b	a	b	a	b									c	d
								b			a	b	a	b	a	b									c	d
								b			a	b	a	b	a	b									c	d
								b			a	b	a	b	a	b									c	d
								b			a	b	a	b	a	b									c	d
								b			a	b	a	b	a	b									c	d
								b			a	b	a	b	a	b									c	d
											a	b	a	b	a	b									c	d
											a	b	a	b	a	b									c	d
											a	b	a	b	a	b									c	d
											a	b	a	b	a	b									c	d
											a	b	a	b		b									c	d
											a	b	a	b		b									c	d
											a	b	a	b		b									c	d
											a	b	a	b		b									c	d
											a	b	a	b		b									c	d
											a	b	a	b		b									c	d
											a	b	a	b		b									c	d
											a	b	a	b		b									c	d
											a	b	a	b		b									c	d
											a	b	a	b		b									c	d
											a	b	a	b		b									c	d
											a	b	a	b		b									c	d
											a	b	a	b		b									c	d
											a	b	a	b		b									c	d
											a	b	a	b		b									c	d
											a	b	a	b		b									c	d
											a	b	a	b		b									c	d
											a	b	a	b		b									c	d
											a	b	a	b		b									c	d
											a	b	a	b		b									c	d
											a	b	a	b		b									c	d
											a	b	a	b											c	d
											a	b	a	b											c	d
											a	b	a	b											c	d
											a	b	a	b											c	d
											a	b	a	b											c	d
											a	b	a	b											c	d
											a	b	a	b											c	d
											a	b	a	b											c	d
											a	b	a	b											c	d
											a	b	a	b											c	d
											a	b	a	b											c	d
											a	b	a	b											c	d
											a	b	a	b											c	d
											a	b	a	b											c	d
											a	b	a	b											c	d
											a	b	a	b											c	d
											a	b	a	b											c	d
											a	b	a	b											c	d
												b	a	b											c	d
												b	a	b											c	d
												b	a	b											c	d
												b	a	b											c	d
												b	a	b											c	d
												b	a	b											c	d
												b	a	b											c	d
												b	a	b											c	d
												b	a	b											c	d
												b	a	b											c	d
												b	a	b												d
												b	a	b												d
												b	a	b												d
												b	a	b												d
												b	a	b												d
												b	a	b												d
												b	a	b												d
												b	a	b												d
													a	b												d
													a	b												d
													a	b												d
													a	b												d
													a	b												d
														b												d
														b												d
														b												d
														b												d
														b												d
														b												d
														b												d
														b												d
														b												d
														b												d
														b												d
														b												d
														b
														b
														b
														b
														b
														b
														b
														b
														b
														b
														b
														b
														b
														b
														b
														b
														b
														b
														b
